# Supplementary material
Source: publisher site journal article supplement (https://www.dovepress.com/article/394325)
Supplement: Supplementary file 1 [file get_supplementary_file.php]

**Supplementary materials**

**Supplementary Table S1** Clinical burden Embase

| Search | | Query | No of Citations |
| --- | --- | --- | --- |
| **Date of Search** | | **20 January 2021** |  |
| **Embase** | | **Search Terms** | **Results** |
| **Population** | 1 | exp chronic obstructive lung disease/ or (coad or copd or chronic airflow obstruction$ or chronic obstructive airway disease$ or chronic obstructive lung disease$ or chronic obstructive pulmonary disease$).ti,ab. | 165581 |
| 2 | (mild$ or (infrequent and exacerbat$) or nonexacerbator or non-exacerbator$ or less frequent exacerbation$ or no exacerbation$ or non-frequent exacerbat$ or GOLD A or GOLD B or ((GOLD or Global Initiative for Chronic Obstructive Lung Disease) adj2 (A or B or A-B)) or ((GOLD or Global Initiative for Chronic Obstructive Lung Disease) and (Group A or Group B or ABCD))).ti,ab. | 641333 |
| 3 | 1 and 2 | 8819 |
| **Outcome** | 4 | (burden adj5 (clinical or disease or illness)).ti,ab. | 65849 |
| 5 | exp morbidity/ or exp mortality/ or (morbid$ or mortal$).ti,ab. | 1880495 |
| 6 | (exacerbation$ or symptom$ or relapse$ or hospital$ or admission$ or emergency or outpatient or inpatient or discontinu$ or switch$).ti,ab. | 4590542 |
| 7 | or/4-6 | 5844449 |
| 8 | 3 and 7 | 5557 |
| **Study Design** | 9 | exp longitudinal study/ or (longitudinal study or retrospective study or prospective study or cohort$ or follow up or cross-sectional study or cross sectional study or followup study or observational study or registry or registries or real world or cross sectional).ti,ab. or exp retrospective study/ or exp prospective study/ or exp cohort analysis/ or exp cross-sectional study/ or exp cohort analysis/ or exp observational study/ | 4384296 |
| 10 | 8 and 9 | 2447 |
| **Filters** | 11 | 10 not ((exp animal/ or exp nonhuman/) not exp human/) | 2422 |
| 12 | (case report or case series or woman or man or child or adolescent or female or male or boy or girl or infant).ti. | 905171 |
| 13 | case report/ or case study/ or case report.jx. or case report$.jw. | 2636624 |
| 14 | exp book/ or exp theoretical study/ or (letter or editorial or erratum or note or short survey).pt. | 3832136 |
| 15 | review.pt. not (((systematic or meta) and analy$) or ((indirect or mixed) and treatment comparison)).ti,ab. | 2583067 |
| 16 | or/12-15 | 9060203 |
| 17 | 11 not 16 | 2250 |
| 18 | limit 17 to (english language and yr="2013-Current") | 1677 |
| 19 | limit 18 to (article or article in press) | 786 |
| 20 | limit 18 to (conference abstract and yr="2019-current") | 229 |
| 21 | 19 or 20 | 1015 |

**Supplementary Table S2** Economic burden Embase

| Search | | Query | No of Citations |
| --- | --- | --- | --- |
| **Date of Search** | | **20 January 2021** |  |
| **Embase** | | **Search Terms** | **Results** |
| **Population** | 1 | exp chronic obstructive lung disease/ or (coad or copd or chronic airflow obstruction$ or chronic obstructive airway disease$ or chronic obstructive lung disease$ or chronic obstructive pulmonary disease$).ti,ab. | 165581 |
| 2 | (mild$ or (infrequent and exacerbat$) or nonexacerbator or non-exacerbator$ or less frequent exacerbation$ or no exacerbation$ or non-frequent exacerbat$ or GOLD A or GOLD B or ((GOLD or Global Initiative for Chronic Obstructive Lung Disease) adj2 (A or B or A-B)) or ((GOLD or Global Initiative for Chronic Obstructive Lung Disease) and (Group A or Group B or ABCD))).ti,ab. | 641333 |
| 3 | 1 and 2 | 8819 |
| **Outcomes** | 4 | exp cost/ or exp budget/ or exp productivity/ or exp reimbursement/ or exp fee/ or exp hospitalization/ or exp work disability/ or exp absenteeism/ or exp sick leave/ or exp cost analysis/ or exp cost of illness/ or exp economics/ or exp hospital admission/ or exp inpatient/ or exp hospital patient/ or exp outpatient/ or exp health resource utilization/ or exp health care utilization/ or exp pharmacoeconomics/ or (cost$ or expenditure$ or resource utilization$ or resource utilization$ or economic$ or pharmacoeconomic$ or price$ or pricing or reimbursement or fee$ or hospitalization or hospitalization or work loss or work lost or absenteeism or presenteeism or sick leave or sick day$ or cost offset or cost of illness or economic$ or hru or hcru or emergency room visit$ or hospital admission$ or inpatient$ or outpatient$ or cost per patient treated or 'health resource use' or health resource utilization$ or health resource utilisation$ or health care consumption or 'medical resource use' or medical resource utilization$ or medical resource utilisation$ or medical resource consumption or economic evaluation).ti,ab. | 3337566 |
| 5 | exp Health Care Costs/ or exp Drug Costs/ or exp Hospital Costs/ or exp hospitalization cost/ or exp pharmacoeconomics/ or exp Cost of Illness/ or exp Direct Service Costs/ or (cost of drugs or hospitalization cost or hospitalisation cost or disease cost or treatment cost or direct cost or direct costs or direct medical cost or direct medical costs or medical direct costs or direct non-medical cost$ or total cost or total costs or cost per patient treated or cost burden or budget impact or societal cost or societal costs or administrative cost or administrative costs or travel cost$ or travel time).ti,ab. | 464644 |
| 6 | exp Absenteeism/ or exp Presenteeism/ or exp Sick Leave/ or (indirect costs or burden of illness or illness cost or illness burden or patient burden or economic burden or disability or functional status or physical function or impairment or disabilities or productivity or employment or retirement or medical leave or work disability or absenteeism or presenteeism or work absence or productivity loss or work impairment or homebound or sick leave or sick day or worktime loss or opportunity loss or job performance or years of life saved or year of life saved or life years saved or qaly or daly or disability adjusted life years).ti,ab. or (work adj2 loss).ti,ab. | 936275 |
| 7 | (healthcare resource$ or medical resource$ or health resource consumption or health care consumption or medical resource consumption or hospitali?ation or hospital admission$ or icu admission$ or emergency department visit$ or emergency room visit$ or er visit$ of ed visit$ or inpatient visit$ or in-patient visit$ or outpatient visit$ or out-patient visit$ or specialist visit$ or unscheduled doctor visit$ or unscheduled physician visit$ or general practitioner visit$).ti,ab. | 348168 |
| 8 | or/4-7 | 4068379 |
| 9 | 3 and 8 | 2827 |
| **Study Design** | 10 | exp longitudinal study/ or (longitudinal study or retrospective study or prospective study or cohort$ or follow up or cross-sectional study or cross sectional study or followup study or observational study or registry or registries or real world or cross sectional).ti,ab. or exp retrospective study/ or exp prospective study/ or exp cohort analysis/ or exp cross-sectional study/ or exp cohort analysis/ or exp observational study/ | 4384296 |
| 11 | exp "cost benefit analysis"/ or exp "cost utility analysis"/ or exp economic evaluation/ or exp "cost effectiveness analysis"/ or exp "cost minimization analysis"/ or (cost-consequence or cost-minimisation or cost minimisation or cost-minimization or cost minimization or cost effectiveness or icer or incremental cost effectiveness ratio or (cost effectiveness and ratio) or incremental cost-effectiveness ratio).ti,ab. | 330216 |
| 12 | 9 and (10 or 11) | 1377 |
| **Filters** | 13 | 12 not (animals/ not humans/) | 1377 |
| 14 | (case report or case series or woman or man or child or adolescent or female or male or boy or girl or infant).ti. | 905171 |
| 15 | case report/ or case study/ or case report.jx. or case report$.jw. | 2636624 |
| 16 | exp book/ or exp theoretical study/ or (letter or editorial or erratum or note or short survey).pt. | 3832136 |
| 17 | review.pt. not (((systematic or meta) and analy$) or ((indirect or mixed) and treatment comparison)).ti,ab. | 2583067 |
| 18 | or/14-17 | 9060203 |
| 19 | 13 not 18 | 1258 |
| 20 | limit 19 to english language | 1227 |
| 21 | limit 20 to yr="2013 -Current" | 896 |
| 22 | limit 21 to (article or article in press) | 426 |
| 23 | limit 21 to (conference abstract and yr="2019-current") | 108 |
| 24 | 22 or 23 | 534 |

**Supplementary Table S3** Clinical burden MEDLINE

| Search | | Query | No of Citations |
| --- | --- | --- | --- |
| **Date of Search** | | **20 January 2021** |  |
| **MEDLINE** | | **Search Terms** | **Results** |
| **Population** | 1 | exp pulmonary disease, chronic obstructive/ or (coad or copd or chronic airflow obstruction$ or chronic obstructive airway disease$ or chronic obstructive lung disease$ or chronic obstructive pulmonary disease$).ti,ab. | 90523 |
| 2 | (mild$ or (infrequent and exacerbat$) or nonexacerbator or non-exacerbator$ or less frequent exacerbation$ or no exacerbation$ or non-frequent exacerbat$ or GOLD A or GOLD B or ((GOLD or Global Initiative for Chronic Obstructive Lung Disease) adj2 (A or B or A-B)) or ((GOLD or Global Initiative for Chronic Obstructive Lung Disease) and (Group A or Group B or ABCD))).ti,ab. | 430130 |
| 3 | 1 and 2 | 4098 |
| **Outcome** | 4 | (burden adj5 (clinical or disease or illness)).ti,ab. | 42370 |
| 5 | exp morbidity/ or exp mortality/ or (morbid$ or mortal$).ti,ab. | 1708687 |
| 6 | (exacerbation$ or symptom$ or relapse$ or hospital$ or admission$ or emergency or outpatient or inpatient or discontinu$ or switch$).ti,ab. | 3125706 |
| 7 | or/4-6 | 4334494 |
| 8 | 3 and 7 | 2400 |
| **Study Design** | 9 | exp Longitudinal Studies/ or exp Retrospective Studies/ or exp Prospective Studies/ or exp Cohort Studies/ or exp Cross-Sectional Studies/ or exp Observational Study/ or (longitudinal study or retrospective study or prospective study or cohort$ or follow up or cross-sectional study or cross sectional study or followup study or observational study or registry or registries or real world or cross sectional).ti,ab. | 3442965 |
| 10 | 8 and 9 | 1182 |
| **Filters** | 11 | 10 not (animals/ not humans/) | 1182 |
| 12 | (case report or case series or woman or man or child or adolescent or female or male or boy or girl or infant).ti. | 818674 |
| 13 | case reports/ or case study/ or case report$.jw. | 2180956 |
| 14 | exp Books/ or exp Models, Theoretical/ or (letter or editorial or erratum or note or short survey).pt. | 3475224 |
| 15 | review.pt. not (((systematic or meta) and analy$) or ((indirect or mixed) and treatment comparison)).ti,ab. | 2649093 |
| 16 | or/12-15 | 8185417 |
| 17 | 11 not 16 | 995 |
| 18 | limit 17 to (english language and yr="2013-Current") | 647 |

**Supplementary Table S4** Economic burden MEDLINE

| Search | | Query | No of Citations |
| --- | --- | --- | --- |
| **Date of Search** | | **20 January 2021** |  |
| **MEDLINE** | | **Search Terms** | **Results** |
| **Population** | 1 | exp pulmonary disease, chronic obstructive/ or (coad or copd or chronic airflow obstruction$ or chronic obstructive airway disease$ or chronic obstructive lung disease$ or chronic obstructive pulmonary disease$).ti,ab. | 90523 |
| 2 | (mild$ or (infrequent and exacerbat$) or nonexacerbator or non-exacerbator$ or less frequent exacerbation$ or no exacerbation$ or non-frequent exacerbat$ or GOLD A or GOLD B or ((GOLD or Global Initiative for Chronic Obstructive Lung Disease) adj2 (A or B or A-B)) or ((GOLD or Global Initiative for Chronic Obstructive Lung Disease) and (Group A or Group B or ABCD))).ti,ab. | 430130 |
| 3 | 1 and 2 | 4098 |
| **Outcomes** | 4 | exp cost/ or exp budget/ or exp productivity/ or exp reimbursement/ or exp fee/ or exp hospitalization/ or exp work disability/ or exp absenteeism/ or exp sick leave/ or exp cost analysis/ or exp cost of illness/ or exp economics/ or exp hospital admission/ or exp inpatient/ or exp hospital patient/ or exp outpatient/ or exp health resource utilization/ or exp health care utilization/ or exp pharmacoeconomics/ or (cost$ or expenditure$ or resource utilization$ or resource utilization$ or economic$ or pharmacoeconomic$ or price$ or pricing or reimbursement or fee$ or hospitalization or hospitalization or work loss or work lost or absenteeism or presenteeism or sick leave or sick day$ or cost offset or cost of illness or economic$ or hru or hcru or emergency room visit$ or hospital admission$ or inpatient$ or outpatient$ or cost per patient treated or 'health resource use' or health resource utilization$ or health resource utilisation$ or health care consumption or 'medical resource use' or medical resource utilization$ or medical resource utilisation$ or medical resource consumption or economic evaluation).ti,ab. | 2489193 |
| 5 | exp Health Care Costs/ or exp Drug Costs/ or exp Hospital Costs/ or exp hospitalization cost/ or exp pharmacoeconomics/ or exp Cost of Illness/ or exp Direct Service Costs/ or (cost of drugs or hospitalization cost or hospitalisation cost or disease cost or treatment cost or direct cost or direct costs or direct medical cost or direct medical costs or medical direct costs or direct non-medical cost$ or total cost or total costs or cost per patient treated or cost burden or budget impact or societal cost or societal costs or administrative cost or administrative costs or travel cost$ or travel time).ti,ab. | 114900 |
| 6 | exp Absenteeism/ or exp Presenteeism/ or exp Sick Leave/ or (indirect costs or burden of illness or illness cost or illness burden or patient burden or economic burden or disability or functional status or physical function or impairment or disabilities or productivity or employment or retirement or medical leave or work disability or absenteeism or presenteeism or work absence or productivity loss or work impairment or homebound or sick leave or sick day or worktime loss or opportunity loss or job performance or years of life saved or year of life saved or life years saved or qaly or daly or disability adjusted life years).ti,ab. or (work adj2 loss).ti,ab. | 673060 |
| 7 | (healthcare resource$ or medical resource$ or health resource consumption or health care consumption or medical resource consumption or hospitali?ation or hospital admission$ or icu admission$ or emergency department visit$ or emergency room visit$ or er visit$ of ed visit$ or inpatient visit$ or in-patient visit$ or outpatient visit$ or out-patient visit$ or specialist visit$ or unscheduled doctor visit$ or unscheduled physician visit$ or general practitioner visit$).ti,ab. | 207462 |
| 8 | or/4-7 | 3025306 |
| 9 | 3 and 8 | 1149 |
| **Study Design** | 10 | exp Longitudinal Studies/ or exp Retrospective Studies/ or exp Prospective Studies/ or exp Cohort Studies/ or exp Cross-Sectional Studies/ or exp Observational Study/ or (longitudinal study or retrospective study or prospective study or cohort$ or follow up or cross-sectional study or cross sectional study or followup study or observational study or registry or registries or real world or cross sectional).ti,ab. | 3442965 |
| 11 | exp Cost-Benefit Analysis/ or exp "Costs and Cost Analysis"/ or (cost-consequence or cost-minimisation or cost minimisation or cost-minimization or cost minimization or cost effectiveness or icer or incremental cost effectiveness ratio or (cost effectiveness and ratio) or incremental cost-effectiveness ratio).ti,ab. | 269842 |
| 12 | 9 and (10 or 11) | 653 |
| **Filters** | 13 | 12 not (animals/ not humans/) | 653 |
| 14 | (case report or case series or woman or man or child or adolescent or female or male or boy or girl or infant).ti. | 818674 |
| 15 | case report/ or case study/ or case report$.jw. | 2180956 |
| 16 | exp Books/ or exp Models, Theoretical/ or (letter or editorial or erratum or note or short survey).pt. | 3475224 |
| 17 | review.pt. not (((systematic or meta) and analy$) or ((indirect or mixed) and treatment comparison)).ti,ab. | 2649093 |
| 18 | or/14-17 | 8185417 |
| 19 | 13 not 18 | 538 |
| 20 | limit 19 to english language | 507 |
| 21 | limit 20 to yr="2013 -Current" | 341 |

**Supplementary Table S5** Economic burden Econ Lit

| Search | | Query | No of Citations |
| --- | --- | --- | --- |
| **Date of Search** | | **20 January 2021** |  |
| **Econ Lit** | | **Search Terms** | **Results** |
| **Population** | 1 | (coad or copd or chronic airflow obstruction$ or chronic obstructive airway disease$ or chronic obstructive lung disease$ or chronic obstructive pulmonary disease$).ti,ab. | 66 |
| 2 | (mild$ or (infrequent and exacerbat$) or nonexacerbator or non-exacerbator$ or less frequent exacerbation$ or no exacerbation$ or non-frequent exacerbat$ or GOLD A or GOLD B or ((GOLD or Global Initiative for Chronic Obstructive Lung Disease) adj2 (A or B or A-B)) or ((GOLD or Global Initiative for Chronic Obstructive Lung Disease) and (Group A or Group B or ABCD))).ti,ab. | 3150 |
| 3 | 1 and 2 | 2 |

**Supplementary Table S6** Humanistic burden Embase

| Search | | Query | No of Citations |
| --- | --- | --- | --- |
| **Date of Search** | | **20 January 2021** |  |
| **Embase** | | **Search Terms** | **Results** |
| **Population** | 1 | exp chronic obstructive lung disease/ or (coad or copd or chronic airflow obstruction$ or chronic obstructive airway disease$ or chronic obstructive lung disease$ or chronic obstructive pulmonary disease$).ti,ab. | 165581 |
| 2 | (mild$ or (infrequent and exacerbat$) or nonexacerbator or non-exacerbator$ or less frequent exacerbation$ or no exacerbation$ or non-frequent exacerbat$ or GOLD A or GOLD B or ((GOLD or Global Initiative for Chronic Obstructive Lung Disease) adj2 (A or B or A-B)) or ((GOLD or Global Initiative for Chronic Obstructive Lung Disease) and (Group A or Group B or ABCD))).ti,ab. | 641333 |
| 3 | 1 and 2 | 8819 |
| **Outcome** | 4 | exp Quality of Life/ or (qol or quality of life or hrql or hrqol or quality adjusted life year or quality adjusted life years or qaly or patient reported outcome or patient reported outcomes or satisfaction or preference$ or activities of daily living or adl or assessment of quality of life or aqol or quality of well being scale).ti,ab. | 1022361 |
| 5 | ((utilit* and health) or (utilit* and scor*) or (utilit* and valu*) or (disutilit* and health) or (disutilit* and scor*) or (disutilit* and valu*) or daly or dalys or disability adjusted life year$ or standard gamble or time trade off or time tradeoff or visual analog scale or visual analogue scale or discrete choice experiment or qwb or 15d or health utilities index or hui or hui1 or hui2 or hui3).ti,ab. | 198075 |
| 6 | (sf36 or sf 36 or sf6 or sf 6 or short form 6 or sf6d or sf 6d or short form 6d or eq 5d or eq5d or euroqol or euro qol or health status or hye or hyes or health$ year$ equivalent$ or rosser index or quality of wellbeing or qwb or st george$ respiratory questionnaire$ or SGRQ or Chronic Obstructive Pulmonary Disease Assessment Test or Chronic Respiratory Disease Questionnaire or CRQ or Severe Respiratory Insufficiency or SRI or Clinical Chronic Obstructive Pulmonary Disease Questionnaire or CCQ or Shortness of Breath Questionnaire or SOBQ or Airways Questionnaire 20 or AQ20 or Breathing Problems Questionnaire or BPQ or Short Form 1210 or SF1210 or SF-1210 or Functional Assessment of Chronic Illness Therapy-Fatigue or FACIT-F or Psychological General Well-being Index or PGWBI).ti,ab. | 150940 |
| 7 | or/4-6 | 1251698 |
| 8 | 3 and 7 | 1635 |
| **Study Design** | 9 | exp longitudinal study/ or (longitudinal study or retrospective study or prospective study or cohort$ or follow up or cross-sectional study or cross sectional study or followup study or observational study or registry or registries or real world or cross sectional).ti,ab. or exp retrospective study/ or exp prospective study/ or exp cohort analysis/ or exp cross-sectional study/ or exp cohort analysis/ or exp observational study/ | 4384296 |
| 10 | exp "cost utility analysis"/ or exp "cost minimization analysis"/ or exp economic evaluation/ or exp "cost benefit analysis"/ or exp "cost effectiveness analysis"/ or (cost-consequence or cost-minimisation or cost minimisation or cost-minimization or cost minimization or cost effectiveness or icer or incremental cost effectiveness ratio or (cost effectiveness and ratio) or incremental cost-effectiveness ratio).ti,ab. | 330216 |
| 11 | 8 and (9 or 10) | 769 |
| **Filters** | 12 | 11 not ((exp animal/ or exp nonhuman/) not exp human/) | 756 |
| 13 | (case report or case series or woman or man or child or adolescent or female or male or boy or girl or infant).ti. | 905171 |
| 14 | case report/ or case study/ or case report.jx. or case report$.jw. | 2636624 |
| 15 | exp book/ or exp theoretical study/ or exp case report/ or (letter or editorial or erratum or note or short survey).pt. | 6105151 |
| 16 | review.pt. not (((systematic or meta) and analy$) or ((indirect or mixed) and treatment comparison)).ti,ab. | 2583067 |
| 17 | or/13-16 | 9060203 |
| 18 | 12 not 17 | 706 |
| 19 | limit 18 to (english language and yr="2013 -Current") | 519 |
| 20 | limit 19 to (article or article in press) | 240 |
| 21 | limit 19 to (conference abstract and yr="2019-current") | 68 |
| 22 | 20 or 21 | 308 |

**Supplementary Table S7** Humanistic burden MEDLINE

| Search | | Query | No of Citations |
| --- | --- | --- | --- |
| **Date of Search** | | **20 January 2021** |  |
| **MEDLINE** | | **Search Terms** | **Results** |
| **Population** | 1 | exp pulmonary disease, chronic obstructive/ or (coad or copd or chronic airflow obstruction$ or chronic obstructive airway disease$ or chronic obstructive lung disease$ or chronic obstructive pulmonary disease$).ti,ab. | 90523 |
| 2 | (mild$ or (infrequent and exacerbat$) or nonexacerbator or non-exacerbator$ or less frequent exacerbation$ or no exacerbation$ or non-frequent exacerbat$ or GOLD A or GOLD B or ((GOLD or Global Initiative for Chronic Obstructive Lung Disease) adj2 (A or B or A-B)) or ((GOLD or Global Initiative for Chronic Obstructive Lung Disease) and (Group A or Group B or ABCD))).ti,ab. | 430130 |
| 3 | 1 and 2 | 4098 |
| **Outcomes** | 4 | exp Quality of Life/ or (qol or quality of life or hrql or hrqol or quality adjusted life year or quality adjusted life years or qaly or patient reported outcome or patient reported outcomes or satisfaction or preference$ or activities of daily living or adl or assessment of quality of life or aqol or quality of well being scale).ti,ab. | 660422 |
| 5 | ((utilit* and health) or (utilit* and scor*) or (utilit* and valu*) or (disutilit* and health) or (disutilit* and scor*) or (disutilit* and valu*) or daly or dalys or disability adjusted life year$ or standard gamble or time trade off or time tradeoff or visual analog scale or visual analogue scale or discrete choice experiment or qwb or 15d or health utilities index or hui or hui1 or hui2 or hui3).ti,ab. | 133287 |
| 6 | (sf36 or sf 36 or sf6 or sf 6 or short form 6 or sf6d or sf 6d or short form 6d or eq 5d or eq5d or euroqol or euro qol or health status or hye or hyes or health$ year$ equivalent$ or rosser index or quality of wellbeing or qwb or st george$ respiratory questionnaire$ or SGRQ or Chronic Obstructive Pulmonary Disease Assessment Test or Chronic Respiratory Disease Questionnaire or CRQ or Severe Respiratory Insufficiency or SRI or Clinical Chronic Obstructive Pulmonary Disease Questionnaire or CCQ or Shortness of Breath Questionnaire or SOBQ or Airways Questionnaire 20 or AQ20 or Breathing Problems Questionnaire or BPQ or Short Form 1210 or SF1210 or SF-1210 or Functional Assessment of Chronic Illness Therapy-Fatigue or FACIT-F or Psychological General Well-being Index or PGWBI).ti,ab. | 104740 |
| 7 | or/4-6 | 826186 |
| 8 | 3 and 7 | 719 |
| **Study Design** | 9 | exp Longitudinal Studies/ or exp Retrospective Studies/ or exp Prospective Studies/ or exp Cohort Studies/ or exp Cross-Sectional Studies/ or exp Observational Study/ or (longitudinal study or retrospective study or prospective study or cohort$ or follow up or cross-sectional study or cross sectional study or followup study or observational study or registry or registries or real world or cross sectional).ti,ab. | 3442965 |
| 10 | exp Cost-Benefit Analysis/ or exp "Costs and Cost Analysis"/ or (cost-consequence or cost-minimisation or cost minimisation or cost-minimization or cost minimization or cost effectiveness or icer or incremental cost effectiveness ratio or (cost effectiveness and ratio) or incremental cost-effectiveness ratio).ti,ab. | 269842 |
| 11 | 8 and (9 or 10) | 372 |
| **Filters** | 12 | 11 not (animals/ not humans/) | 372 |
| 13 | (case report or case series or woman or man or child or adolescent or female or male or boy or girl or infant).ti. | 818674 |
| 14 | case report/ or case study/ or case report$.jw. | 2180956 |
| 15 | exp Books/ or exp Case Reports/ or exp Models, Theoretical/ or (letter or editorial or erratum or note or short survey).pt. | 5403711 |
| 16 | review.pt. not (((systematic or meta) and analy$) or ((indirect or mixed) and treatment comparison)).ti,ab. | 2649093 |
| 17 | or/13-16 | 8185417 |
| 18 | 12 not 17 | 322 |
| 19 | limit 18 to (english language and yr="2013 -Current") | 207 |

**Supplementary Table S8** Clinical burden EBSCO PsycInfo

| Search | | Query | No of Citations |
| --- | --- | --- | --- |
| **Date of Search** | | **20 January 2021** |  |
| **EBSCO – PsycInfo** | | **Search Terms** | **Results** |
| **Population** | 1 | exp Chronic Obstructive Pulmonary Disease/ or (coad or copd or chronic airflow obstruction$ or chronic obstructive airway disease$ or chronic obstructive lung disease$ or chronic obstructive pulmonary disease$).ti,ab. | 2866 |
| 2 | (mild$ or (infrequent and exacerbat$) or nonexacerbator or non-exacerbator$ or less frequent exacerbation$ or no exacerbation$ or non-frequent exacerbat$ or GOLD A or GOLD B or ((GOLD or Global Initiative for Chronic Obstructive Lung Disease) adj2 (A or B or A-B)) or ((GOLD or Global Initiative for Chronic Obstructive Lung Disease) and (Group A or Group B or ABCD))).ti,ab. | 63805 |
| 3 | 1 and 2 | 117 |
| **Outcome** | 4 | (burden adj5 (clinical or disease or illness)).ti,ab. | 6115 |
| 5 | exp morbidity/ or exp "death and dying"/ or (morbid$ or mortal$).ti,ab. | 88966 |
| 6 | (exacerbation$ or symptom$ or relapse$ or hospital$ or admission$ or emergency or outpatient or inpatient or discontinu$ or switch$).ti,ab. | 591027 |
| 7 | 4 OR 5 OR 6 | 658430 |
| 8 | 3 and 7 | 65 |
| **Study Design** | 9 | (longitudinal study or retrospective study or prospective study or cohort$ or follow up or cross-sectional study or cross sectional study or followup study or observational study or registry or registries or real world or cross sectional).ti,ab. | 334782 |
| 10 | 8 and 9 | 26 |
| **Filters** | 11 | Limit 10 to (english language and yr="2013-current) | 15 |

**Supplementary Table S9** Humanistic burden EBSCO PsycInfo

| Search | | Query | No of Citations |
| --- | --- | --- | --- |
| **Date of Search** | | **20 January 2021** |  |
| **EBSCO – PsycInfo** | | **Search Terms** | **Results** |
| **Population** | 1 | exp Chronic Obstructive Pulmonary Disease/ or (coad or copd or chronic airflow obstruction$ or chronic obstructive airway disease$ or chronic obstructive lung disease$ or chronic obstructive pulmonary disease$).ti,ab. | 2866 |
| 2 | (mild$ or (infrequent and exacerbat$) or nonexacerbator or non-exacerbator$ or less frequent exacerbation$ or no exacerbation$ or non-frequent exacerbat$ or GOLD A or GOLD B or ((GOLD or Global Initiative for Chronic Obstructive Lung Disease) adj2 (A or B or A-B)) or ((GOLD or Global Initiative for Chronic Obstructive Lung Disease) and (Group A or Group B or ABCD))).ti,ab. | 63805 |
| 3 | 1 and 2 | 117 |
| **Outcomes** | 4 | exp Quality of Life/ or (qol or quality of life or hrql or hrqol or quality adjusted life year or quality adjusted life years or qaly or patient reported outcome or patient reported outcomes or satisfaction or preference$ or activities of daily living or adl or assessment of quality of life or aqol or quality of well being scale).ti,ab. | 281899 |
| 5 | ((utilit* and health) or (utilit* and scor*) or (utilit* and valu*) or (disutilit* and health) or (disutilit* and scor*) or (disutilit* and valu*) or daly or dalys or disability adjusted life year$ or standard gamble or time trade off or time tradeoff or visual analog scale or visual analogue scale or discrete choice experiment or qwb or 15d or health utilities index or hui or hui1 or hui2 or hui3).ti,ab. | 29419 |
| 6 | (sf36 or sf 36 or sf6 or sf 6 or short form 6 or sf6d or sf 6d or short form 6d or eq 5d or eq5d or euroqol or euro qol or health status or hye or hyes or health$ year$ equivalent$ or rosser index or quality of wellbeing or qwb or st george$ respiratory questionnaire$ or SGRQ or Chronic Obstructive Pulmonary Disease Assessment Test or Chronic Respiratory Disease Questionnaire or CRQ or Severe Respiratory Insufficiency or SRI or Clinical Chronic Obstructive Pulmonary Disease Questionnaire or CCQ or Shortness of Breath Questionnaire or SOBQ or Airways Questionnaire 20 or AQ20 or Breathing Problems Questionnaire or BPQ or Short Form 1210 or SF1210 or SF-1210 or Functional Assessment of Chronic Illness Therapy-Fatigue or FACIT-F or Psychological General Well-being Index or PGWBI).ti,ab. | 26917 |
| 7 | 4 or 5 or 6 | 322787 |
| 8 | 3 and 7 | 39 |
| **Study Design** | 9 | (longitudinal study or retrospective study or prospective study or cohort$ or follow up or cross-sectional study or cross sectional study or followup study or observational study or registry or registries or real world or cross sectional).ti,ab. | 334782 |
| 10 | (cost-consequence or cost-minimisation or cost minimisation or cost-minimization or cost minimization or cost effectiveness or icer or incremental cost effectiveness ratio or (cost effectiveness and ratio) or incremental cost-effectiveness ratio).ti,ab. | 7663 |
| 11 | 8 and (9 or 10) | 17 |
| **Filter** | 12 | limit 11 to (english language and yr="2013-Current") | 8 |

# Supplementary Table S10 Prevalence Embase

| Search | | Query | No of Citations |
| --- | --- | --- | --- |
| **Date of Search** | | **20 January 2021** |  |
| **Embase** | | **Search Terms** | **Results** |
| **Population & Outcome** | 1 | exp chronic obstructive lung disease/ or (coad or copd or chronic airflow obstruction$ or chronic obstructive airway disease$ or chronic obstructive lung disease$ or chronic obstructive pulmonary disease$).ti,ab. | 165581 |
| 2 | (mild$ or (infrequent and exacerbat$) or nonexacerbator or non-exacerbator$ or less frequent exacerbation$ or no exacerbation$ or non-frequent exacerbat$ or GOLD A or GOLD B or ((GOLD or Global Initiative for Chronic Obstructive Lung Disease) adj2 (A or B or A-B)) or ((GOLD or Global Initiative for Chronic Obstructive Lung Disease) and (Group A or Group B or ABCD))).ti,ab. | 641333 |
| 3 | 1 and 2 | 8819 |
| 4 | exp prevalence/ or prevalence.ti,ab. | 1122258 |
| 5 | 3 and 4 | 1144 |
| **Study Design** | 6 | exp longitudinal study/ or (longitudinal study or retrospective study or prospective study or cohort$ or follow up or cross-sectional study or cross sectional study or followup study or observational study or registry or registries or real world or cross sectional).ti,ab. or exp retrospective study/ or exp prospective study/ or exp cohort analysis/ or exp cross-sectional study/ or exp cohort analysis/ or exp observational study/ | 4384296 |
| 7 | 5 and 6 | 562 |
| **Filters** | 8 | 7 not (animals/ not humans/) | 562 |
| 9 | (case report or case series or woman or man or child or adolescent or female or male or boy or girl or infant).ti. | 905171 |
| 10 | case report/ or case study/ or case report$.jx. or case report$.jw. | 2636624 |
| 11 | exp book/ or exp theoretical study/ or (letter or editorial or erratum or note or short survey).pt. | 3832136 |
| 12 | review.pt. not (((systematic or meta) and analy$) or ((indirect or mixed) and treatment comparison)).ti,ab. | 2583067 |
| 13 | or/9-12 | 9060203 |
| 14 | 8 not 13 | 541 |
| 15 | limit 14 to (english language and yr="2013-Current") | 407 |
| 16 | limit 15 to (article or article in press) | 200 |
| 17 | limit 15 to (conference abstract and yr="2019-current") | 46 |
| 18 | 16 or 17 | 246 |

# Supplementary Table S11 Prevalence MEDLINE

| Search | | Query | No of Citations |
| --- | --- | --- | --- |
| **Date of Search** | | **20 January 2021** |  |
| **MEDLINE** | | **Search Terms** | **Results** |
| **Population & Outcome** | 1 | exp pulmonary disease, chronic obstructive/ or (coad or copd or chronic airflow obstruction$ or chronic obstructive airway disease$ or chronic obstructive lung disease$ or chronic obstructive pulmonary disease$).ti,ab. | 90523 |
| 2 | (mild$ or (infrequent and exacerbat$) or nonexacerbator or non-exacerbator$ or less frequent exacerbation$ or no exacerbation$ or non-frequent exacerbat$ or GOLD A or GOLD B or ((GOLD or Global Initiative for Chronic Obstructive Lung Disease) adj2 (A or B or A-B)) or ((GOLD or Global Initiative for Chronic Obstructive Lung Disease) and (Group A or Group B or ABCD))).ti,ab. | 430130 |
| 3 | 1 and 2 | 4098 |
| 4 | exp prevalence/ or prevalence.ti,ab. | 740472 |
| 5 | 3 and 4 | 510 |
| **Study Design** | 6 | exp Longitudinal Studies/ or exp Retrospective Studies/ or exp Prospective Studies/ or exp Cohort Studies/ or exp Cross-Sectional Studies/ or exp Observational Study/ or (longitudinal study or retrospective study or prospective study or cohort$ or follow up or cross-sectional study or cross sectional study or followup study or observational study or registry or registries or real world or cross sectional).ti,ab. | 3442965 |
| 7 | 5 and 6 | 267 |
| **Filters** | 8 | 7 not (animals/ not humans/) | 267 |
| 9 | (case report or case series or woman or man or child or adolescent or female or male or boy or girl or infant).ti. | 818674 |
| 10 | case report/ or case study/ or case report$.jw. | 2180956 |
| 11 | exp Books/ or exp Models, Theoretical/ or (letter or editorial or erratum or note or short survey).pt. | 3475224 |
| 12 | review.pt. not (((systematic or meta) and analy$) or ((indirect or mixed) and treatment comparison)).ti,ab. | 2649093 |
| 13 | or/9-12 | 8185417 |
| 14 | 8 not 13 | 229 |
| 15 | limit 14 to (english language and yr="2013-Current") | 154 |

# Supplementary Table S12 PECOS selection criteria

| Selection Criteria | Inclusion Criteria | | | | Exclusion Criteria |
| --- | --- | --- | --- | --- | --- |
| **SLR topic1**  **Clinical Burden** | **SLR topic 2**  **Economic Burden (Indirect)** | **SLR topic 3**  **Humanistic Burden** | **SLR topic 4**  **Prevalence** | **All SLR topics** |
| **Population** | - Adults (aged 18 years or older) with physician diagnosed mild or mild-to-moderate COPD treated, specifically, GOLD A/B target cohort as defined by the GOLD 2013, 2017 or 2020 criteria - Patients who can be indirectly (but definitively) mapped to the GOLD A/B category based on exacerbation history - During screening studies will be tagged according to the GOLD classification used. Should there be sufficient studies using the 2017 or 2020 criteria to address the research questions, data extraction and reporting will be limited to this evidence to help ensure comparability of study findings, given the changes that the occurred in the GOLD classification between the 2013 and 2017 versions of the guidelines | | | | - Children and adolescents < 18 years old - Studies that classified patients using the 2011 or earlier versions of the GOLD classification of COPD - Mixed populations in which the outcomes are not separable for target cohort - Studies evaluating fewer than 50 COPD patients in target cohort |
| **Exposures/Comparator Exposuresa** | Any or none of the following exposures indicating greater disease severity:   - Poorer lung function as measured by FEV1, expressed as % predicted - Worse GOLD group of COPD severity, as defined by 2013, 2017 or 2020 criteria (among those in the A/B cohort) - More frequent mild (self-managed) or moderate (outpatient-treated) exacerbations - Higher symptom burden as measured by a symptom score (MRC/mMRC Dyspnoea Scale/CAT/SGRQ) | | | | None |
| **Baseline characteristicsb and Outcomes** | - FEV1 % predicted - Exacerbation history - Symptom score (MRC/mMRC Dyspnoea Scale; CAT/SGRQ) - Smoking history - COPD medication history (including history of pharmaco-therapy failure/ switching) - Current COPD medication - Comorbidities (as reported by % of patients with specific comorbidities or measured on comorbidity severity scale e.g., CCI) - Current clinical status (clinically stable vs. current/ recent exacerbation) - Clinical burden - Symptoms - Any exacerbations (mild, moderate, severe) - Mortality - Risk factors for clinical burden outcomes (in multivariate analysis) | - FEV1 % predicted - Exacerbation history - Symptom score (MRC/mMRC Dyspnoea Scale; CAT/SGRQ) - Smoking history - COPD medication history (including history of pharmaco-therapy failure/ switching) - Current COPD medication - Comorbidities (as reported by % of patients with specific comorbidities or measured on comorbidity severity scale e.g., CCI) - Current clinical status (clinically stable vs. current/recent exacerbation)   **Costs (total and disaggregated):**   - Direct - Indirect - Resource use - Physician visits - Specialist visits - Hospitalisations - ED visits - Length of stay - Prescriptions for COPD medications (proportion of patients taking and/or number of prescriptions per patient) | - FEV1 % predicted - Exacerbation history - Symptom score (MRC/mMRC Dyspnoea Scale; CAT/SGRQ) - Smoking history - COPD medication history (including history of pharmaco-therapy failure/ switching) - Current COPD medication - Comorbidities (as reported by % of patients with specific comorbidities or measured on comorbidity severity scale e.g., CCI) - Current clinical status (clinically stable vs. current/recent exacerbation)   **Disease-specific and generic measures:**   - AQ20 - BPQ - CCQ - CAT - CRQ - EQ-5D - FACIT-F - PGWBI - SF-36/SF-12 - SGRQ - SOBQ - SRI Questionnaire - Risk factors for humanistic burden outcomes (in multivariate analysis) | - FEV1 % predicted - Exacerbation history - Symptom score (MRC/mMRC Dyspnoea Scale; CAT/SGRQ) - Smoking history - COPD medication history (including history of pharmaco-therapy failure/ switching) - Current COPD medication - Comorbidities (as reported by % of patients with specific comorbidities or measured on comorbidity severity scale e.g., CCI) - Current clinical status (clinically stable vs. current/recent exacerbation)   **Prevalence of patients in target cohort among the following:**   - the general population - all patients with COPD | Publications that do not report on the epidemiology or burden topics listed in the inclusion criteria |
| **Study Design** | - Observational cohort studies: prospective; retrospective (case-control, cross-sectional, database, registry) - Post-hoc analyses of clinical trialsc - SLR of observational studies published within the previous three years will have their bibliographies checked for potentially relevant studies but will not be processed further in the proposed SLR. | | | | - Case reports, editorials, comments / commentary, guidelines, news, or narrative reviews - Animal studies, in-vitro/ex-vivo studies, gene expression / protein expression studies - Clinical trials/randomised controlled studies/ interventional studies reporting treatment outcomes |
| **Time Limits** | - Full-text articles: 2013–2020 - Conference abstracts: last two occurrences 2019–2020 | | | | - Full-text articles published prior to 2013 - Conference abstracts presented prior to 2019 |

AQ20 = airways questionnaire 20, BPQ = breathing problems questionnaire, CAT = COPD Assessment Test, CCI = Charlson comorbidity index, CCQ = clinical chronic obstructive pulmonary disease questionnaire, COPD = chronic obstructive pulmonary disease, CRQ = chronic respiratory disease questionnaire, ED = emergency department, EQ-5D = EuroQoL five dimension scale, FACIT-F = functional assessment of chronic illness therapy-fatigue, FEV1 = forced expiratory volume in one second, GOLD = Global Initiative for Chronic Obstructive Lung Disease, MRC = Medical Research Council, mMRC = modified Medical Research Council, PGWBI = psychological general well-being index, SF-36 = 36-item short form survey, SF-12 = 12-item short form survey, SGRQ = St. George’s Respiratory Questionnaire, SLR = systematic literature review, SOBQ = shortness of breath questionnaire, SRI = severe respiratory insufficiency.

aStudies were not excluded based on whether or not they reported outcomes of interest according to exposures indicating greater severity of COPD. However, any such data on relationship between the listed exposures and outcomes in eligible studies was captured during data extraction

bBaseline characteristics of the target population i.e., GOLD A/B COPD cohort as defined by the GOLD 2013, 2017 or 2020 criteria described in studies that report any of the outcomes of interest was captured during data extraction

cInterventional studies in which outcomes were reported according to the allocated treatment were excluded. However, a post-hoc analysis of a large, long-term clinical trial (such as TIOSPIR) was considered potentially eligible observational data, if it assessed disease outcomes rather than outcomes of the treatment(s) allocated in the original interventional study.

# Supplementary Table S13 Study characteristics

| **Publication** | **GOLD classification** | **Geographic location** | **Study design** | **Study setting** | **Data source** | **Study period** | **Follow-up duration** | **Study population** | **Sample size** |
| --- | --- | --- | --- | --- | --- | --- | --- | --- | --- |
| Agarwal 2018 [1] | 2017 | India | Cross-sectional study | Inpatients and outpatient | NR | NR | NA | GOLD A and GOLD B | 150 |
| Bhatt 2016 [2] | 2013 | US | Prospective cohort study (Prospective follow-up of a clinical trial) | NR | COPD Gene multicentre study (NCT00608764) | NR | 2.1 years | GOLD A and GOLD B | 3464 |
| Bikov 2018 [3] | 2016, 2017 | Hungary | Prospective cohort study | Outpatient | Subjects from two Hungarian cohort studies | NR | 1.5 years | GOLD A and GOLD B | 834 |
| Brat 2018 [4] | 2017 | Czech Republic | Prospective cohort study | NR | CMRD | Aug 2013–Dec 2016a | 5 years | GOLD A and GOLD B | 725 |
| Brusselle 2015 [5] | 2013 | UK | Retrospective cohort study | Outpatient | OPCRD | 2002–2010 | 2 years post diagnosis | GOLD A and GOLD B | 11,858 |
| Candemir 2018 [6] | 2017 | Turkey | Retrospective cohort study | Outpatient | NR | Jan 2013–May 2017 | NR | GOLD A and GOLD B | 427 |
| Casanova 2014 [7] | 2013 | Spain | Prospective cohort study | Outpatient | COPD History Assessment In Spain (CHAIN) study (NCT01122758) | Jan 2010–Mar 2012a | 1 year | GOLD A and GOLD B | 828 |
| Chai 2019 [8] | Indirect mapping | Malaysia | Cross-sectional study | Outpatient | NR | Jun 2017–May 2018 | NA | GOLD AB combined | 189 |
| Chai 2020 [9] | Indirect mapping | Malaysia | Cross-sectional study | Outpatient | NR | Jan 2018–Jan 2019 | NA | GOLD AB combined | 185 |
| Chalmers 2018 [10] | 2017 | UK | Retrospective cohort study | Outpatient | CPRD | Jul 2005–Jun 2015 | 2.6 years | GOLD A and GOLD B | Pre-matching: 4009  Post-matching: 3478 |
| Chen 2015 [11] | 2013 | Taiwan | Prospective cohort study | Outpatient | NR | Jan 2006–Dec 2012 | 2.8 yearsb | GOLD A and GOLD B | Mortality: 354  Exacerbation rate: 262 |
| Cheng 2017 [12] | Indirect mapping | China | Retrospective cohort study | Inpatient | NR | Nov 2015–Oct 2016 | NR | GOLD AB combined | 142 |
| Cho 2019 [13] | 2017 | Republic of Korea | Prospective cohort study | Unclear | KOLD [17 centres] since June 2005, and 2) KOCOSS (NCT02800499) [48 centres] since Dec 2011 | Jun 2005–Apr 2017a  Dec 2011– Apr 2017a KOCOSS | 11 years | GOLD A only | 340 |
| Choi 2018 [14] | 2017 | Korea | Prospective cohort study | Outpatient | KOCOSS (NCT02800499) | Dec 2011–Jul 2017 (enrolment period) | 1 year | GOLD B only | 2010 |
| Criner 2019 [15] | 2017 | US | Prospective cohort study | Unclear | COPD Gene cohort (NCT00608764) | NR (Study only included patients whose vital status was available as of Oct 2016 and exacerbation data was available to Oct 2013) | 6.8 years | GOLD A and GOLD B | 4469 |
| Crisafulli 2017 [16] | 2013 | Italy | Prospective cohort study | Outpatient | NR | Jan 2014–Feb 2016 | 2.2 yearsb | GOLD A and GOLD B | 202 |
| Ding 2017 [17] | 2014 | France, Germany, Italy, Spain, the UK, and the USA | Cross-sectional study | Outpatient | Respiratory Disease Specific Program | Third quarter of 2013 (Information collection) | NA | GOLD A and GOLD B | 1641 |
| Ding 2018 [18] | 2017 | US | Cross-sectional study | Unclear | NR | Jan 2017–Jun 2017 | NA | GOLD A and GOLD B | 1775 |
| Donaldson 2013 [19] | Indirect mapping | UK | Prospective cohort study | Outpatient | ECLIPSE Study | NR | 2 years | Indirect mapping to GOLD AB combined | 1832 |
| Dua 2019 [20] | 2017 | India | Retrospective cohort study | NR | Hospital medical records | NR | NR | GOLD A and GOLD B | 413 |
| Duarte-de-Araújo 2019 [21] | 2017 | Portugal | Cross-sectional study | Outpatient | NR | Mar 2016–May 2017 | NA | GOLD A and GOLD B | 303 |
| Echazarreta 2018 [22] | 2017 | Argentina | Cross-sectional study | Unclear | NR | Aug 2014–May 2016 | NA | GOLD A and GOLD B | 3469 |
| Faner 2018 [23] | 2017 | Multicentre international study | Prospective cohort study | Outpatient |  | NR | 3 years | GOLD A and GOLD B | 2101 |
| Garcia Castillo 2020 [24] | 2015 and 2019 | Multicentre international study (11 countries – names not reported) | Prospective cohort study | Inpatient and outpatient | 3CIA | 1999–2017a | 5 years | GOLD A and GOLD B | 8823 |
| Gayle 2018 [25] | 2013, 2017 | UK | Cross-sectional study | Outpatient | CPRD | Jan 2016–Dec 2016 | NA | GOLD A and GOLD B | 19,268 |
| Gedebjerg 2018 [26] | 2017 | Denmark | Prospective cohort study | Outpatient | Danish registry for COPD | Jan 2008– Nov 2013 | 2.2 years | GOLD A and GOLD B | 33,765 |
| Golpe 2015 [27] | 2014 | Spain | Retrospective cohort study | Outpatient | Hospital medical records | 2009–2014 | 2.1 yearsb BS-COPD: 2.6 years T-COPD: 2.4 years | GOLD A and GOLD B | 612 |
| Graf 2018 [28] | 2017 | Germany | Prospective cohort study | Unclear | COPD and COSYCONET | Sep 2010–Dec 2013a (Visit 1)  2014–2015a (Vist 2&3) | 7.5 years | GOLD A and GOLD B | 2281 |
| Grewe 2020 [29] | 2014 | Switzerland | Prospective cohort study | Inpatient and outpatient | The Obstructive Pulmonary Disease Outcomes Cohort Study (TOPDOCS) | Oct 2010–Dec 2016 | 2.03 years | GOLD A and GOLD B | 305 |
| Gunen 2015 [30] | 2013 | Turkey | Cross-sectional study | Outpatient | NR | Jun 2013–Dec 2013 | NA | GOLD A and GOLD B | 1610 |
| Gupta 2018 [31] | 2016 | India | Cross-sectional study | Inpatient and outpatient | NR | Aug 2015–Jul 2016 | NA | GOLD A and GOLD B | 109 |
| Halpin 2019 [32] | 2017 | UK | Prospective cohort study | Outpatient | OPCRD | Jan 2013–Dec 2016 (Period of registration of included patients in the data source) | 2 years | GOLD A and GOLD B | Cohort 1: 11,409  Cohort 2:  699 |
| Han 2018 [33] | 2013 and 2017 | Taiwan | Retrospective cohort study | Outpatient | NR | Jan 2006–Dec 2017 | 5.18 years | GOLD A and GOLD B | 553 |
| Hogman 2018 [34] | 2014 and 2017 | Sweden | Cross-sectional study | Outpatient | NR | Sep 2014–Sep 2016a | NA | GOLD A and GOLD B | 571 |
| Horner 2020 [35] | 2019 | Austria | Cross-sectional study | Outpatient | CLARA Project | NR | NA | GOLD A and GOLD B | 850 |
| Hsieh 2018 [36] | 2017 | Taiwan | Retrospective cohort study | Outpatient | TOLD | Nov 2012–Aug 2013a | NR | GOLD A and GOLD B | 1053 |
| Hussey 2020 [37] | 2017 (classification NR assumed GOLD 2017 based on publication date) | NR | Prospective cohort study | Outpatient | NR | NR | 0.98 years | GOLD A and GOLD B | Real-world population: 569  RCT population: 72  Real-world population meeting RCT eligibility: 129 |
| Ierodiakonou 2020 [38] | 2019 | Greece | Cross-sectional study | Outpatient | NR | 2015–2016 | NA | GOLD A and GOLD B | 257 |
| Ivanov 2018 [39] | 2013 | Bulgaria | Prospective cohort study | Outpatient | NR | Aug 2013–Dec 2014 (enrolment period) | NR | GOLD A and GOLD B | 718 |
| Jones 2014 [40] | 2013 | France, Germany, Italy, Spain and UK | Cross-sectional study | Outpatient | DSP | Jun 2011–Sep 2011 | NA | GOLD A and GOLD B | 1041 |
| Jung 2015 [41] | 2013 | South Korea | Cross-sectional study | Outpatient | NR | Mar 2013–Jul 2014a | GOLD A: 0.96 years  GOLD B: 1.25 years | GOLD A and GOLD B | 118 |
| Kahnert 2018 [42] | 2017 | Germany | Cross-sectional study | Unclear | COPD and COSYCONET (NCT01245933) | Sep 2010–Dec 2013a | NA | GOLD A and GOLD B | 2228 |
| Kamusheva 2017 [43] | 2015 | Bulgaria | Cross-sectional study | NR | NR | NR | NA | GOLD A and GOLD B | 426 |
| Kim 2015 [44] | 2014 | South Korea | Prospective cohort study | Outpatient | KOLD | Jun 2005–Oct 2012a | 4 years | GOLD A and GOLD B | 175 |
| Kobayashi 2018 [45] | 2013 and 2017 | Japan | Prospective cohort study | NR | ICON Registry | May 2015–Aug 2017 (Registration period) | 1 year | GOLD A and GOLD B | 401 |
| Kupryś-Lipińska 2014 [46] | 2013 | Poland | Cross-sectional study | Outpatient | Data collected from patients by physicians during routine visits using questionnaire | Jan 2012–Apr 2012 | NA | GOLD A and GOLD B | 2967  (Number of questionnaires analysed) |
| Lawrence 2017 [47] | 2016 | UK | Prospective cohort study | Unclear | COPDMAP prospective observational cohort study | NR | 2 years | GOLD A and GOLD B | 370 |
| Le 2019 [48] | 2017 | Norway | Prospective cohort study | NR | GenKOLS study | 2003–2005 | 6.4 years | GOLD A and GOLD B | 912 |
| Lee 2019 [49] | 2017 | South Korea | Prospective cohort study | Outpatient | NR | Oct 2011–Sep 2013a | 5.1 years | GOLD A and GOLD B | 149 |
| Leivseth 2013 [50] | 2013 | Norway | Prospective cohort study | NR | HUNT2 Lung study | Aug 1995–May 2012 | 14.6 years | GOLD A and GOLD B | 1540 |
| Li 2020 [51] | 2017 (reported as GOLD 2016 and referenced to GOLD 2017) | US | Retrospective cohort study | Inpatient and outpatient | Humana Inc administrative claims database | Cohort 1: Jan 2012 and Dec 2014  Cohort 2: Jan 2013 and Nov 2016 (Identification period) | Cohort 1: 2 years  Cohort 2: 1 year | GOLD AB combined | Cohort 1: 230,442  Cohort 2: 19,645 |
| Løkke 2021 [52] | 2017 (classification NR assumed GOLD 2017 based on publication date) | Denmark | Prospective cohort study | Inpatient and outpatient | Danish health registries | 2008–2017a | 1 year | GOLD A and GOLD B | 82,633 |
| Loh 2018 [53] | 2017 | Malaysia | Prospective cohort study | Outpatient | NR | Sep 2013–Jun 2017 | 2.75 years | GOLD A and GOLD B | 112 |
| Lopez 2018 [54] | 2015 and 2017 | Spain and US | Prospective cohort study | Outpatient | NR | 1997–2016 | 5 years | GOLD A and GOLD B | 819 |
| Marçôa 2018 [55] | 2017 | Portugal | Prospective cohort study | Outpatient | NR | Jan 2015–Dec 2015 | 1 year | GOLD A and GOLD B | 200 |
| Mehta 2014 [56] | 2013 | India | Cross-sectional study | Outpatient | NR | Sep 2013–Nov 2013 | NA | GOLD A and GOLD B | 59 |
| Menezes 2017 [57] | 2013 and 2017 | US | Prospective cohort study | Unclear | The PLATINO study | 2002–2004 | 9 years | GOLD A and GOLD B | 524 |
| Merinopoulou 2016 [58] | 2013 | UK | Prospective cohort study | Inpatient and outpatient | CPRD | Jan 2011–Dec 2013 | NR | GOLD A and GOLD B | 44,201 |
| Miravitlles 2015 [59] | Indirect mapping | Spain | Cross-sectional study | Outpatient | NR | NR | NA | GOLD AB combined | 3125 |
| Moya-Álvarez 2020 [60] | 2017 | Spain | Cross-sectional study | Outpatient | NR | Sep 2017–Dec 2018 (Inclusion period) | NA | GOLD A and GOLD B | 169 |
| Ngo 2019 [61] | 2017 | Vietnam | Cross-sectional study | Inpatient | Respiratory Center of Bach Mai Hospital | Aug 2018–Sep 2018 | NA | GOLD A and GOLD B | 57 |
| Nurwidhiyasari 2019 [62] | 2017 | Indonesia | Cross-sectional study | Outpatient | NR | May 2018–Jun 2018 | NA | GOLD A and GOLD B | 200 |
| Ocheltree 2019 [63] | 2017 | US | Prospective cohort study | NR | SPIROMICS cohort study | NR | NR | GOLD A and GOLD B | 2981 |
| Oishi 2018 [64] | 2015 and 2017 | Japan | Cross-sectional study | Outpatient | CAP study database | Apr 2013–May 2014 | NA | GOLD A only | 1168 |
| Palmiotti 2018 [65] | 2015 | Italy | Cross-sectional study | Inpatient and outpatient | NR | May 2015–Dec 2016 | NA | GOLD A and GOLD B | 693 |
| Plutinsky 2019 [66] | 2011–2016, 2017 | Czech Republic | Prospective cohort study | Unclear | CMRD (NCT01923051) | 2013–Dec 2016 (enrolment period) | 4 years | GOLD A and GOLD B | 720 |
| Price 2014 [67] | 2013 | UK | Retrospective cohort study | Outpatient | OPCRD | Data extracted on May 2013 | NR | GOLD A and GOLD B | 24,957 |
| Price 2016 [68] | 2016 (Study does not report GOLD year Obtained year from Reference 3 Assuming it to be an update of GOLD 2013) | UK | Retrospective cohort study | Outpatient | UK Optimum Patient Care Research Database | 2009–2012 | 4 years | GOLD A and GOLD B | 2217 |
| Radovanovic 2019 [69] | 2017 | Italy | Retrospective cohort study | Outpatient | Hospital medical records | Oct 2014–Nov 2016 | NR | GOLD A and GOLD B | 1360 |
| Rajnoveanu 2020 [70] | 2017 | Romania | Retrospective cohort study | Outpatient | Hospital medical records | Feb 2018–Apr 2018 | NR | GOLD A and GOLD B | 348 |
| Raluy-Callado 2015 [71] | 2013 | UK | Retrospective cohort study | Outpatient | CPRD | Jan 2009–Dec 2013 | NR | GOLD A and GOLD B | Prevalent cohort: 49,286  Incident cohort: 27,224 |
| Song 2018 [72] | 2017 | South Korea | Prospective cohort study | Unclear | KOCOSS (NCT02800499), KOLD, and SNU airway registry (NCT02527486) | NR | 1 year | GOLD A and GOLD B | 1880 |
| Stafyla 2018 [73] | 2016 (Assuming it to be an update of GOLD 2013) | Greece | Retrospective cohort study | Outpatient | Medical records, face to face interviews | Jan 2014–Dec 2015a | NA | GOLD A and GOLD B | 245 |
| Sun 2017 [74] | 2017 | China | Cross-sectional study | Outpatient | NR (Study was a retrospective database analysis, but data source not reported) | 2007–2008a | NA | GOLD A and GOLD B | 1532 |
| Sundh 2017 [75] | 2017 | Sweden | Retrospective cohort studyb (analysis of retrospectively collected cross-sectional data from two timepoints) | Inpatients and outpatient | PRAXIS study COPD cohort | 2005–2014 | NR | GOLD A and GOLD B | 1329 |
| Tashiro 2020 [76] | Indirect mapping | Japan | Retrospective cohort study | NR | NR | 2009–2019 | NR | GOLD AB combined | 481 |
| Thomsen 2013 [77] | 2013 | Denmark | Prospective cohort study | NR | Copenhagen City Heart Study and the Copenhagen General Population Study | Till Aug 2010 (Study start NR) | 4 years | GOLD A and GOLD B | 6574 |
| Vestbo 2019 [78] | 2017 | France, Germany, Italy, Spain, and the UK | Cross-sectional study | Outpatient | DSP | Jan 2017–Mar 2017 (DSP 2017 survey collected data in the first three months of the year) | NA | GOLD A and GOLD B | 1528 |
| Von Siemens 2019 [79] | 2017 | Germany | Cross-sectional study | Unclear | COPD and COSYCONET | Sep 2011–Dec 2013 | NR | GOLD A and GOLD B | 2255 |
| Yazar 2020 [80] | 2017 | Turkey | Cross-sectional study | Outpatient | NR | NR | NA | GOLD A and GOLD B | 251 |
| Yeung 2016 [81] | 2013 | Hong Kong | Cross-sectional study | Outpatient | CDARS | Jan 2014–May 2014 | NA | GOLD A and GOLD B | 139 |
| Zeng 2020 [82] | 2017 | China | Prospective cohort study | Outpatient | NR | Dec 2016–Oct 2019 | 1 year | GOLD A and GOLD B | 4796 |
| Zhou 2020 [83] | 2017 | China | Cross-sectional study | Outpatient | NR | Nov 2015–Dec 2018 | NA | GOLD A and GOLD B | 1241 |

DSP = Adelphi Respiratory Disease Specific Programme, COSYCONET = Systemic Consequences-Comorbidities Network, CMRD = Czech Multicentre Research Database, KOCOSS = Korean COPD Subgroup Study, KOLD = The Korean Obstructive Lung Disease Cohort Study, SNU = Seoul National University, TOLD = Taiwan Obstructive Lung Disease study, CPRD = Clinical Practice Research Datalink, CAP = COPD Assessment in Practice, 3CIA = COPD Cohorts Collaborative International Assessment, ECLIPSE = Evaluation of COPD longitudinally to identify predictive surrogate, GOLD = Global Initiative for Chronic Obstructive Lung Disease, NR = not reported, OPCRD = Optimum Patient Care Research Database, ICON = Ishinomaki COPD Network, CDARS = Hospital Authority’s Clinical Data Analysis and Reporting System, RCT = randomised controlled trial, UK = United Kingdom, US = United States.

aRecruitment period.

bCalculated from months.

# Supplementary Table S14 Patient baseline characteristics

| **Publication** | **GOLD classification** | **GOLD groups reported** | **Sample size and type/ setting** | **GOLD A n (%)** | **GOLD B n (%)** | **Age, mean (SD) [median] [IQR]** | **Male, n (%)** | **Smoking status, n (%) A/B** | **Comorbidities**  **A/B** | **Charlson comorbidity 0/1/2/≥ 3** |
| --- | --- | --- | --- | --- | --- | --- | --- | --- | --- | --- |
| Gedebjerg 2018 [26] | 2017 | GOLD A and  GOLD B | 33,765  Hospital outpatient | 5974 (17.7%) | 9585 (28.4%) | GOLD A: 65.4 (10.9)  GOLD B: 69.5 (10.5) | GOLD A: 3184 (53.3%)  GOLD B: 4752 (49.6%) | Never smoked: 292(4.9%)/ 237 (2.5%)  Current smoker: 2388(40%)/ 2911 (30.4%)  Ex-smoker: 3294 (55.1%)/ 6437 (67.2%) | NR/NR | GOLD A:  3538 (59.2%)/ 1095 (18.3%)/ 774 (13.0%)/ 567 (9.5%)  GOLD B: 4385 (45.7%)/ 2050 (21.4%)/ 1521 (15.9%)/ 1629 (17.0%) |
| Bhatt 2016 [2] | 2013 | GOLD A and  GOLD B | 3464  Unclear | 719 (20.8%)a | 856 (24.7%)a | Overall population (GOLD A/B/C/D):  63.4 (8.5) | Overall population (GOLD A/B/C/D): 1927 (55.6%)a | NR/NR | CAD: 12.9%/16.5% | NR/NR/NR/NR |
| Bikov 2018 [3] | 2016, 2017 | GOLD A and  GOLD B | 834  Secondary care outpatient | NR (46%) | NR (44%) | Overall population (GOLD A/B/C/D):  62 (10) | Overall population (GOLD A/B/C/D):  175 (48%) | NR/NR | CAD: 17%/24%  Hypertension: 56%/56%  Cardiac arrhythmia: 7%/8%  Osteoporosis: 7%/11%  Diabetes: 10%/13% | NR/NR/NR/NR |
| Brat 2018 [4] | 2017 | GOLD A and  GOLD B | 725  NR | 60 (8.3%) | 383 (53.0%) | Overall population (GOLD A/B/C/D):  66.7 (9.4) | Overall population (GOLD A/B/C/D):  520 (71.7%) | NR/NR | NR/NR | NR/NR/NR/NR |
| Gayle 2018 [25] | 2013, 2017 | GOLD A and  GOLD B | 19,268  Primary care | 7792 (48%) | 5839 (36%) | GOLD A:  70 (10)  GOLD B:  71 (11) | GOLD A: 4337 (55.6%)  GOLD B: 3017 (51.7%)a | Current smoker:  2755 (46%)/ 2226 (37%)  Never smoked:  648 (53%)/ 401 (33%)  Ex-smoker: 3601 (48%)/ 2642 (35%) | Concurrent asthma: 37%/39%  Ischemic heart disease: 11%/16%  Heart failure: 4%/8%  Osteoporosis: 12%/16%  Anxiety/ depression: 33%/40%  Lung cancer: 1%/2%  Bronchiectasis: 3%/4%  Diabetes: 12%/17% | NR/NR/NR/NR |
| 2013, 2017 | GOLD A and  GOLD B | 19,268  Primary care | 4793 (29%) | 2816 (17%) | GOLD A:  69 (10)  GOLD B:  72 (11) | GOLD A: 2589 (54%)  GOLD B: 1334 (47.4%)a | Current smoker:  1682 (28%)/ 1095 (18%)  Never smoked:  406 (33%)/ 194 (16%)  Ex-smoker: 2216 (30%)/ 1254 (17%) | Concurrent asthma: 37%/39%  Ischemic heart disease: 11%/16%  Heart failure: 4%/8%  Osteoporosis: 12%/16%  Anxiety/ depression: 33%/40%  Lung cancer: 1%/2%  Bronchiectasis: 3%/4%  Diabetes: 12%/17% | NR/NR/NR/NR |
| Miravitlles 2015 [59] | GOLD criteria is not explicitly stated in the study but was mapped directly from exacerbations. | Indirect mapping GOLD AB combined | 3125  Primary care | Non-exacerbators (combined GOLD A/B): 1894 (60.6%) | Non-exacerbators (combined GOLD A/B): 1894 (60.6%) | Non-exacerbators (combined GOLD A/B): 66.6 (9.7) | Non-exacerbators (combined GOLD A/B): 1617 (85.4%) | Non-exacerbators (combined GOLD A/B)  Current smoker:  482 (26.7%) | NR/NR | NR/NR/NR/NR |
| Brusselle 2015 [5] | 2013 | GOLD A and  GOLD B | 11,858  Primary care | 4882 (41%) | 2933 (25%) | Overall population (GOLD A/B/C/D): 66 (IQR 60–74) | Overall population (GOLD A/B/C/D): 6383 (53.8%) | NR/NR | NR/NR | NR/NR/NR/NR |
| Chalmers 2018 [10] | 2017 | GOLD A and  GOLD B | Pre-match  N = 4009  Post-match  N = 3478  Primary care | Pre-matching:  ICS group: 1044 (59.8%)  Non-ICS group:  1479 (65.3%)  Post matching:  ICS group: 1044 (60%)  Non-ICS: group:  1068 (61.4%) | Pre-matching:  ICS group:  701 (40.2%)  Non-ICS group:  785 (34.7%)  Post matching:  ICS group: 695 (40.0%)  Non-ICS group: 671 (38.6%) | Overall matched cohort (GOLD A/B combined): 67.8 (10) GOLD A/B  Pre-matching: ICS group 67.6 (10.3),  Non-ICS group:  68.0 (10.3) GOLD A/B  Post-matching  ICS group: 67.6 (10.3)  Non-ICS group:  67.9 (10.2) | Overall matched cohort (GOLD A/B combined): 60.5%  Pre-matching: ICS group: 1066 (61.1%)a  Non-ICS group:  1358 (60%)a  Post-matching: ICS group 1063 (61.1%)a  Non-ICS group:  1042 (59.9%)a | GOLD A/B combined  Pre-matching  ICS group  Current smoker:  726 (41.6%)  Never smoked:  90 (5.2%)  Ex-smoker: 773 (44.3%)  Non-ICS group  Current smoker:  994 (43.9%)  Never smoked: 85 (3.8%)  Ex-smoker: 972 (42.9%)  Post-matching  ICS group  Current smoker:  725 (41.7%)  Never smoked:  88 (5.1%)  Ex-smoker: 770 (44.3%)  Non-ICS group  Current smoker:  750 (43.1%)  Never smoked: 67 (3.9%)  Ex-smoker: 761 (43.8%) | GOLD A/B combined  Pre-matching ICS group  Eosinophilia  (> 0.4 × 109/L): 6.8%  Eosinophilia  (> 0.3 × 109/L): 18.7%  Asthma diagnosed  > 1 year prior: 17.8%  Type II diabetes: 15.5%  Osteoporosis/ osteopenia: 13.0%  Stroke: 6.8%  MI: 9.5%  Pneumonia: 20.5%  Non-ICS group  Eosinophilia  (> 0.4 × 109/L): 6.8%  Eosinophilia  (> 0.3 × 109/L): 17.6%  Asthma diagnosed  > 1 year prior: 13.4%  Type II diabetes: 15.0%  Osteoporosis/ osteopenia: 12.6%  Stroke: 6.4%  MI: 10.5%  Pneumonia: 19.6%  Post-matching  ICS group: Eosinophilia  (> 0.4 × 109/L): 6.8%  Eosinophilia  (> 0.3 × 109/L): 7.3%  Asthma diagnosed  > 1 year prior: 17.5%  Type II diabetes: 15.5%  Osteoporosis/ osteopenia: 13.1%  Stroke: 6.7%  MI: 9.5%  Pneumonia: 20.5%  Non-ICS group  Eosinophilia  (> 0.4 × 109/L): 7.3%  Eosinophilia  (> 0.3 × 109/L): 17.7%  Asthma diagnosed  > 1 year prior: 15.7%  Type II diabetes: 15.4%  Osteoporosis/ osteopenia: 12.9%  Stroke: 6.6%  MI: 9.5%  Pneumonia: 20.5% | NR/NR/NR/NR |
| Chen 2015 [11]c | 2013 | GOLD A and  GOLD B | N = 354 for mortality  N = 262 for exacerbation rate  Hospital outpatient | 78 (22%) | 83 (23.4%) | GOLD A:  74.7 (5.6)  GOLD B:  77.9 (6.5) | GOLD A: (96%)  GOLD B: (90%) | Current smoker: 69.2%/68.7% | CVD: 35.9%/28.9%  Cancer: NR/12.1% | NR/NR/NR/NR |
| Cho 2019 [13] | 2017 | GOLD A only | 340  Unclear | 100% | 0% | GOLD A  No regular treatment  Pre-matching: 67.4 (7.3)  Post-matching: 67.8 (7.0)  Regular treatment  Pre-matching: 67.2 (7.0)  Post-matching: 67.3 (6.9) | GOLD A  No regular treatment  Pre-matching: 131 (96.3%)  Post-matching:  103 (96.3%)  Regular treatment  Pre-matching: 200 (98.0%)  Post-matching:  105 (98.1%) | Current smoker  No regular treatment  Pre-matching: 46 (33.8%)  Post-matching:  36 (33.6%)  Regular treatment  Pre-matching: 69 (33.8%),  Post-matching: 32 (29.9%)  Ex-smoker  No regular treatment  Pre-matching: 90 (66.2%)  Post-matching:  71 (66.4%)  Regular treatment  Pre-matching: 135 (66.2%)  Post-matching:  75 (70.1%)/ NA (Study included only GOLD A patients) | NR/NA (Study only included GOLD A patients) | NR/NR/NR/NR |
| Choi 2018 [14] | 2017 | GOLD B only | 2010  Hospital outpatient | 433 (21.5%) | 1261 (62.7%) | GOLD B:  70.1 (8.0) | GOLD B: 1379 (92.1%) | NA (only GOLD B patients)  Current smoker:  358 (28.6%) | NA (Study included only GOLD B patients)  Hypertension: 39.2%  Diabetes mellitus: 15.9%  Heart failure: 3.6%  MI: 4.6%  Chronic bronchitis: 16.2%  GERD: 8.6%  Pneumonia: 12.9% | NR/NR/NR/NR |
| Crisafulli 2017 [16] | 2013 | GOLD A and  GOLD B | 202  Hospital outptient | Overall  GOLD A:  70 (35%)  Patients with SAD:  34 (23.0%)  Patients without SAD: 36 (67.3%)a | Overall  GOLD B:  43 (21%)  Patients with SAD:  38 (26%)  Patients without SAD: 5 (9%)a | Overall population (GOLD A/B/C/D):  67.4 (9.2) | Overall population (GOLD A/B/C/D):  152 (75%) | NR/NR | NR/NR | NR/NR/NR/NR |
| Faner 2018 [23] | 2017 | GOLD A and  GOLD B | 2101  Hospital outpatient | 650(NR%) | 534(NR%) | NR | NR | NR/NR | NR/NR | NR/NR/NR/NR |
| Ivanov 2018 [39] | 2013 | GOLD A and  GOLD B | 718  Hospital outpatient | 107 (13.4%)a | 209 (26.3%)a | Overall population (GOLD A/B/C/D): 66.75 (9.31) | Overall population (GOLD A/B/C/D):  466 (64.9%) | NR/NR | NR/NR | NR/NR/NR/NR |
| Kahnert 2018 [42] | 2017 | GOLD A and  GOLD B | 2228  Unclear | According to CAT: 244 (11%)a  According to mMRC:  863 (38.7%)a | According to CAT: 1177 (52.8%)a  According to mMRC:  558 (25%)a | GOLD A  According to CAT:  66.7 (8.3)  According to mMRC:  65.0 (8.5)  GOLD B  According to CAT:  65.3 (8.4)  According to mMRC:  66.3 (8.1) | GOLD A  According to CAT:  163 (67%)  According to mMRC:  546 (63%)  GOLD B  According to CAT:  730 (62%)  According to mMRC:  347 (62%) | NR/NR | NR/NR | NR/NR/NR/NR |
| Loh 2018 [53] | 2017 | GOLD A and  GOLD B | 112  Hospital outpatient | 35 (31.3%) | 33 (29.5%) | Overall population (GOLD A/B/C/D):  67 (7.4) | Overall population (GOLD A/B/C/D):  105 (93.7%) | NR/NR | NR/NR | NR/NR/NR/NR |
| Marçôa 2018 [55] | 2017 | GOLD A and  GOLD B | 200  Hospital outpatient | 42 (21%) | 100 (50%) | Overall population (GOLD A/B/C/D):  69 (10) | Overall population (GOLD A/B/C/D):  175 (87.5%) | NR/NR | NR/NR | NR/NR/NR/NR |
| Menezes 2017 [57] | 2013 and 2017 | GOLD A and  GOLD B | 524  Unclear | 376 (71.8%)a | 92 (17.6%)a | NR  (≥ 40 years) | Overall population (GOLD A/B/C/D): 281 (53.6%) | NR/NR | NR/NR | NR/NR/NR/NR |
| 2013 and 2017 | GOLD A and  GOLD B | 524  Unclear | GOLD A:  363 (69.3%)  GOLD 1A: 253 (48.3%)  GOLD 2A:  98 (18.7%)  GOLD 3A:  11 (2.1%)  GOLD 4A:  1 (< 1%) | GOLD B:  134 (25.6%)  GOLD 1B:  62 (11.8%)  GOLD 2B:  58 (11.1%)  GOLD 3B:  11 (2.1%)  GOLD 4B:  3 (< 1%) | GOLD 1A: 64.7  GOLD 2A: 62.4  GOLD 3A: 67.7  GOLD 4A: 74.5  GOLD 1B: 66.9  GOLD 2B: 63.8  GOLD 3B: 62.4  GOLD 4B: 56.8 (SD not reported for any category) | GOLD 1A: 64%  GOLD 2A: 61.2%  GOLD 3A: 54.6%  GOLD 4A: 100%  GOLD 1B: 21%  GOLD 2B: 36.2%  GOLD 3B: 27.3%  GOLD 4B: 66.7% | NR/NR | NR/NR | NR/NR/NR/NR |
| Merinopoulou 2016 [58] | 2013 | GOLD A and  GOLD B | 44,201  Primary care and secondary care: outpatient and inpatient | 12,493 (28.3%) | 7752 (17.5%) | Age at index date (Jan 1, 2011)  GOLD A:  69.9 (10.4)  GOLD B:  73.9 (10.6)  Age at diagnosis  GOLD A:  65.3 (10.2)  GOLD B: 68.6 (10.7) | GOLD A: 6802 (54%)  GOLD B: 3810 (49%) | Current smoker:  3331 (26.7%)/ 1904 (24.6%)  Never smoked:  1136 (9.1%)/ 617 (8.0%)  Ex-smoker: 6619 (53.0%)/ 4230 (54.6%) | MI: 6.8%/10.5%  Diabetes: 14.4%/19.9%  Hypertension: 34.4%/39.3%  Osteoporosis: 6.9%/10.5%  Anxiety: 1.7%/1.4%  Depression: 2.4%/2.6% | NR/NR/NR/NR |
| Plutinsky 2019 [66] | 2011–2016, 2017 | GOLD A and  GOLD B | 720  Unclear | GOLD 2011–2016:  35 (4.9%)  GOLD 2017: 61 (8.5%) | GOLD 2011–2016:  150 (20.8%)  GOLD 2017: 380 (52.8%) | Overall population (GOLD A/B/C/D)  Age at inclusion  (n = 720):  66.6 (9.3)  Age at COPD diagnosis  (n = 682): 58.7 (10.9) | Overall population (GOLD A/B/C/D): 526 (73.1%) | NR/NR | NR/NR | NR/NR/NR/NR |
| Sun 2017 [74] | 2017 | GOLD A and  GOLD B | 1532  Hospital outpatient | 557 (36.4%) | 405 (26.4%) | GOLD A:  65.0 (10.2)  GOLD B:  65.8 (10.9) | GOLD A:  370 (66.4%)  GOLD B:  266 (65.7%) | Never smoked:  182 (32.7%)/ 119 (29.4%)  Ex-smoker:  224 (40.2%)/ 185 (45.7%)  Current smoker:  151 (27.1%)/ 101 (24.9%) | Hypertension: 25.5%/27.2%  CAD: 10.2%/13.8%  Diabetes mellitus: 5.7%/6.9%  Stroke: 3.9%/3.7%  Chronic bronchitis: 68.4%/74.1% | NR/NR/NR/NR |
| Duarte-de-Araújo 2019 [21] | 2017 | GOLD A and  GOLD B | 303  Hospital outpatient | 70 (23.1%) | 120 (39.6%) | Overall population (GOLD A/B/C/D):  67.5 (10.2) | Overall population (GOLD A/B/C/D):  241 (79.5%) | NR/NR | Chronic bronchitis: 10.3%/27.8% | NR/NR/NR/NR |
| Gunen 2015 [30] | 2013 | GOLD A and  GOLD B | 1610  Hospital outpatient | 661 (41.1%) | 335 (20.8%) | GOLD A:  61.0 (10.0)  GOLD B:  65.2 (10.0) | GOLD A:  550 (83.2%)  GOLD B:  290 (86.6%) | Current smoker:  238 (36.0%)/ 96 (28.7%)  Ex-smoker: 423 (64.0%)/ 239 (71.3%) | CVD: 36.5%/46%  Musculoskeletal disease: 1.5%/2.7%  Psychiatric disease: 2.3%/2.7%  Diabetes mellitus: 11%/12.8%  Others: 2%/2.1% | NR/NR/NR/NR |
| Jung 2015 [41] | 2013 | GOLD A and  GOLD B | 118  Hospital inpatient | 27 (22.9%) | 45 (38.1%) | GOLD A:  67.8 (9.5)  GOLD B:  69.5 (8.2) | GOLD A:  26 (96.3%)  GOLD B:  40 (88.9%)a | NR/NR | NR/NR | NR/NR/NR/NR |
| Kupryś-Lipińska 2014 [46] | 2013 | GOLD A and  GOLD B | 2967 (Number of question-naires analysed)  Primary care | 1499 (52.67%) | 305 (10.72%) | Overall population (GOLD A/B/C/D): 61.15 (10.25) | GOLD A:  953 (63.6%)  GOLD B:  193 (63.3%)a | Smoker:  935 (62.4%)/ 153 (50.2%)  Ex-smoker: 555 (37.0%)a/ 148 (48.5%)a | NR/NR | NR/NR/NR/NR |
| Ngo 2019 [61] | 2017 | GOLD A and  GOLD B | 57  Hospital inpatient | NR | NR | Overall population (GOLD A/B/C/D):  67.8 (8) | Overall population (GOLD A/B/C/D):  53 (93%) | NR/NR | NR/NR | NR/NR/NR/NR |
| Price 2014 [67] | 2013 | GOLD A and  GOLD B | 24,957  mMRC: 23,294  CAT:  5882  Primary care | Based on mMRC:  9140 (39.2%)  Based on CAT: 'n' not reported: (13.4%) | Based on mMRC: 4651 (20%)  Based on CAT: 'n' not reported: (46.1%) | GOLD A:  69.7 (10.6)  GOLD B:  74.1 (10.8) | GOLD A: 4889 (53.5%)  GOLD B: 2249 (48.4%) | Current smoker:  3034 (33.2%)/ 1365 (29.3%)  Ex-smoker: 4824 (52.8%)/ 2691 (57.9%)  Non-smoker: 1280 (14%)/ 595 (12.8%) | Anxiety or depression: 28.9%/34.6%  Asthma: 27%/27.1%  Diabetes: 16.9%/22.1%  CKD  (stage ≥ 3): 14%/25%  Ischemic heart disease: 12.5%/24.3%  Osteoporosis: 10.5%/16.4%  Rhinitis: 12.8%/11.2%  GERD: 11%/12.4%  Heart failure: 4.7%/11.7% | NR/NR/NR/NR |
| Raluy-Callado 2015 [71] | 2013 | GOLD A and  GOLD B | Prevalent cohort: 49,286  Incident cohort: 27,224  Primary care | NR Combined distribution of GOLD A/B:  Prevalent cohort: 32,723 (66.4%)  Incident cohort: 18,709 (68.7%) | NR Combined distribution of GOLD A/B:  Prevalent cohort: 32,723 (66.4%)  Incident cohort: 18,709 (68.7%) | Age at diagnosis:  Prevalent cohort (GOLD A/B):  64.3 (11.0)  Incident cohort (GOLD A/B):  66.8 (11.5) | Prevalent cohort (GOLD A/B): 16,725 (51.1%)  Incident cohort (GOLD A/B): 10,008 (53.5%) | GOLD A/B combined Prevalent cohort  Unknown: 4643 (14.2%)  Current smoker:  8852 (27.1%)  Never smoked:  3176 (9.7%)  Ex-smoker: 16,052 (49.1%)  Incident cohort  Unknown: 2411 (12.9%)  Current smoker:  7554 (40.4%)  Never smoked:  1272 (6.8%)  Ex-smoker: 7472 (39.9%) | GOLD A/B combined  Prevalent cohort  MI:  2620 (8.0%)  Diabetes:  6227 (19%)  Hypertension: 11,361 (34.7%)  Osteoporosis: 3430 (10.5%)  Anxiety:  564 (1.7%)  Depression: 902 (2.8%)  Incident cohort  MI: 1358 (7.3%)  Diabetes:  2429 (13%)  Hypertension: 5763 (30.8%)  Osteoporosis: 1153 (6.2%)  Anxiety:  405 (2.2%)  Depression: 675 (3.6%) | NR/NR/NR/NR |
| Thomsen 2013 [77] | 2013 | GOLD A and  GOLD B | 6574  NR | 5088 (77.4%)a | 928 (14.1%)a | GOLD A: 65 (IQR 57–74)  GOLD B: 73 (IQR 64–79) | GOLD A: 2433 (48%)  GOLD B:  411 (44%) | Current smoker:  1944 (38%)/ 369 (40%)  Ex-smoker:  1932 (38%)/ 397 (108%) | NR/NR | NR/NR/NR/NR |
| Candemir 2018 [6] | 2017 | GOLD A and  GOLD B | 427  Hospital outpatient | 73 (17%) | 103 (24%) | GOLD A:  59 (8)  GOLD B:  64 (9) | GOLD A:  73 (100%)  GOLD B:  103 (100%) | NR/NR | NR/NR | NR/NR/NR/NR |
| Casanova 2014 [7] | 2013 | GOLD A and  GOLD B | 828  Hospital outpatient | 147 (17.8%) | 314 (37.9%) | GOLD A:  66 (8)  GOLD B:  68 (9) | GOLD A:  125 (85%)  GOLD B:  255 (81.2%)a | Active smoker: 40%/38% | Heart disease: 10.1%/15.2%  Anxiety: 43%/80.4%  Depression: 21%/47.8% | NR/NR/NR/NR |
| Vestbo 2019 [78] | 2017 | GOLD A and  GOLD B | 1528  Primary care | 183 (12%) | 935 (61.1%) | GOLD A: 61.7  GOLD B: 65.8 (SD Not reported) | GOLD A: (73.8%)  GOLD B: (65%) | Current smokers 23.2%/29.3%  Ex-smokers: 71.3%/62.1% | Hypertension: 53.9%/66%  Elevated cholesterol/hy-perlipidaemia: 26.1%/25.6%  Diabetes: 13.3%/13.3%  Anxiety: 6.1%/11.8%  GERD: 6.1%/10.6% | NR/NR/NR/NR |
| Von Siemens 2019 [79] | 2017 | GOLD A and  GOLD B | 2255  Unclear | 871 (38.6%)a | 567 (25.1%)a | GOLD A:  65.1 (8.5)  GOLD B:  66.2 (8.1) | GOLD A:  548 (62.9%  GOLD B:  352 (62.1%)a | Smoking status  Active:  260 (29.9%)/ 130 (22.9%)  Not active: 581 (66.7%)a/ 437 (77.1%)a | Asthma: 15.7%/16.2%  Sleep apnoea: 7.6%/11.6%  Diabetes: 10.9%/13.4%  Hyperlipidaemia43.7%/39.5%  Hyperuricemia: 14.1%/20.1%  GI disorders: 38.9%/45.3%  Hypertension: 52.9%/59.3%  Coronary heart disease: 13.1%/20.6%  MI: 7.5%/10.2%  Heart failure: 2.8%/5.5%  Osteoporosis: 11.6%/16.6%  Arthritis: 7.7%/9.2%  Mental disorders: 16.1%/21.5% | NR/NR/NR/NR |
| Zhou 2020 [83] | 2017 | GOLD A and  GOLD B | 1241  Hospital outpatient | 123 (9.9%) | 579 (46.7%) | Overall population (GOLD A/B/C/D): 63.31 (8.93) | Overall population (GOLD A/B/C/D): 1066 (85.9%) | NR/NR | NR/NR | NR/NR/NR/NR |
| Agarwal 2018 [1] | 2017 | GOLD A and  GOLD B | 150  Hospital inpatient and outpatient | 7 (4.7%)a | 61 (40.7%)a | NR | Overall population (GOLD A/B/C/D):  COPD patients with depression: 29 (63.04%)  COPD patients without depression: 81 (77.88%) | NR/NR | Depression: 0%/9.8%a | NR/NR/NR/NR |
| Yazar 2020 [80] | 2017 | GOLD A and  GOLD B | 251  Primary care | ‘n' not reported (31.9%) | ‘n' not reported (25.1%) | GOLD A:  64 (7.8)  GOLD B:  65 (8) | GOLD A:  76 (95%)  GOLD B:  51 (81%) | NR/NR | Hypertension: 31.3%/39.7%  CAD: 16.3%/15.9%  Diabetes mellitus: 8.8%/14.3%  GERD: 7.5%/7.9% | NR/NR/NR/NR |
| Chai 2019 [8] | GOLD criteria is not explicitly stated in the study but was mapped directly from exacerbations. | Indirect mapping GOLD AB combined | 189  Hospital outpatient | Non-exacerbators (combined GOLD A/B): 54 (28.6%) | Non-exacerbators (combined GOLD A/B): 54 (28.6%) | Non-exacerbators (combined GOLD A/B): 74.1 (8.1) | Non-exacerbators (combined GOLD A/B): 50 (92.6%) | Non-exacerbator (combined GOLD A/B)  Never smoked:  2 (3.7%)  Ex-smoker:  40 (74.1%)  Current smoker:  12 (22.2%) | Non-exacerbators (combined GOLD A/B)  Chronic bronchitis: 46.3%  Emphysema: 53.7% | NR/NR/NR/NR |
| Chai 2020 [9] | GOLD criteria is not explicitly stated in the study but was mapped directly from exacerbations | Indirect mapping GOLD AB combined | 185  Hospital outpatient | Non-exacerbators (combined GOLD A/B): 108 (58.4%) | Non-exacerbators (combined GOLD A/B): 108 (58.4%) | Non-exacerbators (combined GOLD A/B): 60.5 (11.6) | Non-exacerbators (combined GOLD A/B): 83 (76.9%) | Non-exacerbator (combined GOLD A/B):  Never smoked:  35 (32.4%)  Ex- or current smoker:  73 (67.6%) | NR/NR | NR/NR/NR/NR |
| Cheng 2017 [12] | GOLD criteria not explicitly stated in the study report but was mapped directly from information on exacerbations | Indirect mapping GOLD AB combined | 142  Hospital inpatient | Infrequent-exacerbators (GOLD A/B combined):  82 (57.8%)a | Infrequent-exacerbators (GOLD A/B combined):  82 (57.8%)a | Infrequent-exacerbators (GOLD A/B combined): 66.72 (10.97) | Infrequent exacerbators: 62 (75.6%)a | All 82 patients in the infrequent exacerbators group | Infrequent exacerbators  Systemic hypertension: 15.8%  Coronary heart disease: 2.4%  Diabetes mellitus: 2.4%  Chronic bronchitis: 32.9%  Emphysema: 46.3%  ACOS: 20.7%a | NR/NR/NR/NR |
| Criner 2019 [15] | 2017 | GOLD A and  GOLD B | 4469  Unclear | Based on mMRC: 'n' not reported (37%)  Based on SGRQ: 'n' not reported (32.1%) | Based on mMRC: 'n' not reported (36.3%)  Based on SGRQ: 'n' not reported (41.2%) | Overall population (GOLD A/B/C/D):   63.1 (8.6) | Overall population (GOLD A/B/C/D):  (55.9%)a | NR/NR | NR/NR | NR/NR/NR/NR |
| Ocheltree 2019 [63] | 2017 | GOLD A and  GOLD B | 2981  NR | NR | Based on mMRC: 'n' not reported (12.08%)  Based on CAT: 'n' not reported (36.68%) | GOLD A (remained in GOLD A using mMRC and CAT):  67.5 (7.2)  GOLD B (shifted from mMRC GOLD A to CAT GOLD B): 65.4 (7.5) | NR | Current smoker: [GOLD A using mMRC and CAT] 32.6%/18.2% [shifted from mMRC GOLD A to CAT GOLD B] | NR/NR | NR/NR/NR/NR |
| Lee 2019 [49] | 2017 | GOLD A and  GOLD B | 149  Hospital outpatient | 35 (23.5%) | 77 (51.7%) | GOLD A:  70.3 (7.51)  GOLD B:  71.2 (7.62) | GOLD A:  35 (100%)  GOLD B: (83.1%) | Current smoker:  12 (34.3%)/ 33 (42.9%)  Ex-smoker:  23 (65.7%)/ 44 (57.1%) | Hypertension: 20%/18.2%  Diabetes: 8.6%/7.8%  CVD: 22.9%/11.7% | NR/NR/NR/NR |
| Ding 2017 [17] | 2014 (Assuming it to be an update of GOLD 2013) | GOLD A and  GOLD B | 1641  Primary care | 169 (10.3%)a | 742 (45.2%) | GOLD A:  62.6 (10.1)  GOLD B:  65 (10.2) | GOLD A:  112 (66.3%)  GOLD B:  510 (68.7%) | Current smoker:  58 (34.5%)/ 246 (33.2%)  Ex-smoker:  98 (58.3%)/ 450 (60.6%)  Never smoked:  12 (7.1%)/ 46 (6.2%) | NR/NR | NR/NR/NR/NR |
| Garcia Castillo 2020 [24] | 2015 and 2019 (Assuming them to be update of GOLD 2013 and GOLD 2017) | GOLD A and  GOLD B | 8823  Hospital inpatient and outpatient | GOLD 2015: 'n' not reported (29.9%)  GOLD 2019: 'n' not reported (37.7%) | GOLD 2015: 'n' not reported (16.4%)  GOLD 2019: 'n' not reported (38.6%) | Overall population (GOLD A/B/C/D):  63.9 (9.8) | Overall population (GOLD A/B/C/D): 5552 (62.9%) | NR/NR | NR/NR | NR/NR/NR/NR |
| Grewe 2020 [29] | 2014 (Assuming it to be an update of GOLD 2013) | GOLD A and  GOLD B | 305  Hospital inpatient and outpatient | NR | NR | Overall population (GOLD A/B/C/D):  62.3 (7.3) | Overall population (GOLD A/B/C/D):  201 (65.9%) | NR/NR | NR/NR | NR/NR/NR/NR |
| Gupta 2018 [31] | 2016 (Study does not report GOLD year Obtained year from Reference 3 Assuming it to be an update of GOLD 2013) | GOLD A and  GOLD B | 109  Hospital inpatient and outpatient | 47 (43.1%) | 30 (27.5%) | GOLD A: 57.57 (6.55)  GOLD B: 59.10 (8.28) | GOLD A:  34 (72.3%)  GOLD B:  16 (53.3%) | NR/NR | Ascites and hepatomegaly: 2.1%/NR  Pulmonary hypertension Mild: 48.8%  Moderate: 0%  Severe: 0%/Mild: 43.9%  Moderate: 27.3%  Severe: 0% | NR/NR/NR/NR |
| Halpin 2019 [32] | 2017 | GOLD A and  GOLD B | Cohort 1: 11,409  Cohort 2: 699  Primary care | GOLD 2014  Cohort 1: 5053 (44.3%)  Cohort 2: 316 (45.2%)  GOLD 2016  Cohort 1: 'n' not reported (41.4%)  Cohort 2: 'n' not reported (47.9%) | GOLD 2014  Cohort 1: 2938 (25.7%)  Cohort 2: 199 (28.5%)  GOLD 2016  Cohort 1: 'n' not reported (28.1%)  Cohort 2: 'n' not reported (28.3%) | Cohort 1  GOLD A: 70.4 (9.5)  GOLD B: 72.1 (9.6)  Cohort 2  GOLD A: 67.9 (9.9)  GOLD B: 69.8 (11.7) | Cohort 1  GOLD A: 56.9%  GOLD B: 55%  Cohort 2  GOLD A: 59.5%  GOLD B: 58.3% | Cohort 1  Current smoker:  1571 (31.3%)/ 906 (31%)  Ex-smoker: 2886 (57.4%)/ 1713 (58.6%)  Never smoked:  569 (11.3%)/ 306 (10.4%)  Cohort 2  Current smoker:  147 (46.7%)/ 89 (44.7%)  Ex-smoker: 143 (45.4%)/ 93 (46.7%)  Never smoked:  25 (7.9%)/ 17 (8.6%) | Cohort 1  Diabetes mellitus: 13.8%/19.4%  Osteoporosis: 6.2%/7.6%  CVD: 8.9%/12.2%  Heart failure: 0.7%/2%  Anxiety/ depression: 16.7%/21.7%  Hypertension: 45.3%/51.1%  Ischaemic heart disease: 14.8%/24.3%  GERD: 13.2%15.4%  Pneumonia: 0.5%/0.5%  Asthma: 17.4%/17.8%  Cohort 2  Diabetes mellitus: 13.3%/18.6%  Osteoporosis: 2.5%/7%  CVD: 8.2%/11.1%  Heart failure: 0.9%/2.5%  Anxiety/ depression: 17.1%/20.1%  Hypertension: 39.9%/47.2%  Ischaemic heart disease: 15.5%/23.6%  GERD: 10.8%/16.1%  Pneumonia: 0.6%/0.5%  Asthma: 11.7%/10.1% | NR/NR/NR/NR |
| Jones 2020 [40] | 2013 | GOLD A and  GOLD B | 1041  Primary and secondary care outpatient | Based on mMRC:  393 (37.8%)  Based on CAT:  97 (9.3%) | Based on mMRC:  209 (20.1%)  Based on CAT:  505 (48.5%) | GOLD A  Based on mMRC: 62.6  Based on CAT: 61.9  GOLD B  Based on mMRC: 64.5  Based on CAT 63.6 % [SD Not reported] | GOLD A  Based on mMRC: 73%  Based on CAT: 72%  GOLD B  Based on mMRC: 72%  Based on CAT: 72% | Current smoker mMRC: 32%/29%  CAT: 29%/32% | Aggregate data  Angina pectoris: 3.1%/4.5%  Cardiac arrythmias: 4.1%/9.3%  CHF: 0.0%/3.4%  Elevated cholesterol/ hyperlipidaemia13.4%/29.5%  Hypertension: 38.1%/55.4%  PVD: 1.0%/4.7%  Anxiety: 2.1%/5.1%  Arthritis: 3.1%/5.5%  Depression: 0.0%/4.7%  Diabetes: 4.1%/15.8%  Obesity: 2.1%/12.3%  Osteoporosis: 4.1%/4.7%  Prostate disorder: 4.1%/5.7%  Other: 7.2%/6.1%  Based on mMRC  Diabetes: 13%/15.8%  Hypertension: 49.9%/57.9%  Hyperlipidaemia24.9%/30.6%  CAD: 4.8%/5.7%  Based on CAT  Diabetes: 4.1%/15.8%  Hypertension: 38.1%/55.4%  Hyperlipidaemia13.4%/29.5%  CAD: 3.1%/5.5% | NR/NR/NR/NR |
| Lawrence 2017 [47] | 2016 (Assuming it to be an update of GOLD 2013) | GOLD A and  GOLD B | 370  Unclear | 34 (9.2%) | 107 (28.9%) | Overall population (GOLD A/B/C/D):  70.2 (8.8) | GOLD A: (58.8%)  GOLD B: (67.3%) | Current smoker: 15.2%/36.5% | Any CV comorbidity: 61.8%/82.2%  Any comorbidities: 35.3%/16.8%  Chronic bronchitis: 21.2%/57.4% | NR/NR/NR/NR |
| Kim 2015 [44] | 2014 (Assuming it to be an update of GOLD 2013) | GOLD A and  GOLD B | 175  Hospital outpatient | 58 (33.1%) | 45 (25.7%) | GOLD A:  66.1 (7.6)  GOLD B:  64.9 (6.6) | GOLD A:  57 (98.3%)  GOLD B:  42 (93.3%) | Current smoker:  22 (37.9%)/ 12 (26.7%) | NR/NR | NR/NR/NR/NR |
| Stafyla 2018 [73] | 2016 (Assuming it to be an update of GOLD 2013) | GOLD A and  GOLD B | 245  Hospital outpatient | 57 (23.3%) | 38 (15.5%) | Overall population (GOLD A/B/C/D):  69.5 (8.8) | Overall population (GOLD A/B/C/D):  231 (94.3%) | NR/NR | NR/NR | NR/NR/NR/NR |
| Li 2020 [51] | 2017 (reported as GOLD 2016 and referenced to GOLD 2017) | GOLD AB combined | Cohort 1: 23,0442  Cohort 2: 19,645  Hospital inpatient and outpatient | Cohort 1: NR  Cohort 2: GOLD A/B: 11,790 (60%) | Cohort 1: NR  Cohort 2: GOLD A/B: 11,790 (60%) | Cohort 1: NR  Cohort 2: GOLD A/B: 70.45 (8.46) | Cohort 1: NR  Cohort 2: GOLD A/B: 6145 (52.1%)a | NR/NR | NR/NR | Cohort 1: NR/NR/NR/NR  Cohort 2 Overall population (GOLD A/B/C/D):  1569 (8.0%)/ 6855 (34.9%)/ 3824 (19.5%)/ 2612 (13.3%) |
| Donaldson 2013 [19] | GOLD criteria is not explicitly stated in the study but was mapped directly from exacerbations | Indirect mapping GOLD AB combined | 1832  Hospital outpatient | Infrequent exacerbators (GOLD A/B combined): 1289 (70%) | Infrequent exacerbators (GOLD A/B combined): 1289 (70%) | Infrequent exacerbators (GOLD A/B combined):  64 (7) | Infrequent exacerbators (GOLD A/B combined): (68%)a | Infrequent exacerbators  Active smoker: 37%/37% | Infrequent exacerbators (GOLD A/B combined): Diabetes: 10%  CV (excluding hypertension): 33%  Reflux/ heartburn: 23%  Anxiety: 14%  Depression symptoms: 21% | NR/NR/NR/NR |
| Oishi 2018 [64] | 2015 and 2017 (Assuming GOLD 2015 to be an update of GOLD 2013) | GOLD A only | 1168  Hospital outpatient | GOLD 2015: (41.4%)  GOLD 2017: 569 (48.7%)  mMRC grade 0 and no exacerbation: 179 (15.3%)  mMRC grade 0 and a history of one exacerbation: 35 (3.0%)  mMRC grade 1 and no exacerbation history:  273 (23.4%)  mMRC grade 1 and a history of one exacerbation: 82 (7%) | GOLD 2015: 'n' not reported (18.8%)  GOLD 2017: 451 (38.6%) | GOLD A: 70.6 (8.3)  mMRC 0: 71 (IQR: 66–77)  mMRC 1: 71 (IQR: 66–77)]  GOLD B–D: 73.5 (8.1) | GOLD A: 519 (91.2%) mMRC 0: 195 (91.1%)  mMRC 1: 324 (91.3%)]  GOLD B–D: 516 (86.1%) | Never smoked:  24 (4.2%)  Ex-smoker: 456 (80.2%)  Current smoker:  89 (15.6%)  mMRC 0:  Never smoked:  7 (3.3%)  Ex-smoker: 172 (80.3%)  Current smoker:  35 (16.4%)  mMRC 1:  Never smoked:  17 (4.8%)  Ex-smoker: 286 (80.6%)  Current smoker:  52 (14.6%)]/ NR (Study reported data for combined group B–D) | NR/NR | NR/NR/NR/NR |
| Lopez 2018 [54] | 2015 and 2017 (Assuming GOLD 2015 to be an update of GOLD 2013) | GOLD A and  GOLD B | 819  Hospital outpatient | GOLD 2015: 'n' not reported (42.86%)  GOLD 2017: 'n' not reported (53.36%) | GOLD 2015: 'n' not reported (14.04%)  GOLD 2017: 'n' not reported (26.74%) | Overall population (GOLD A/B/C/D):  66 (9) | Overall population (GOLD A/B/C/D):  686 (84%) | NR/NR | NR/NR | NR/NR/NR/NR |
| Echazarreta 2018 [22] | 2017 | GOLD A and  GOLD B | 3469  Unclear | n' not  reported (52%) | ‘n' not reported (43%) | Overall population (GOLD A/B/C/D):  58.8 (11.6) | Overall population (GOLD A/B/C/D): 1461 (42.1%) | NR/NR | NR/NR | NR/NR/NR/NR |
| Løkke 2020 [52] | 2017 (Abstract does not report GOLD year Since published in 2020, assuming GOLD 2017) | GOLD A and  GOLD B | 82,633  Hospital inpatient and outpatient | NR | NR | NR | NR | NR/NR | NR/NR | NR/NR/NR/NR |
| Han 2018 [33] | 2013 and 2017 | GOLD A and  GOLD B | 553  Hospital outpatient | GOLD 2013: 143 (25.9%)  GOLD 2017: 157 (28.4%) | GOLD 2013: 128 (23.1%)  GOLD 2017: 186 (33.6%) | GOLD A: 67.55 (11.23)  GOLD B: 72.37 (9.66) | GOLD A: (93%)  GOLD B: (93%) | Current smoker: 'n' not reported (54.1%)/'n' not reported (59.6%) | Major CVD (including old MI, CAD, and CHF): 20.4%/23.7% | NR/NR/NR/NR |
| Hogman 2018 [34] | 2014 and 2017 (Assuming GOLD 2014 to be an update of GOLD 2013) | GOLD A and  GOLD B | 571  Primary and secondary care outpatient | GOLD A:  188 (32.9%)a (Group C changing to group A: 33 Group A remaining in group A: 155) | GOLD B:  244 (42.7%)a (Group D changing to group B: 96 Group B remaining in group B: 148) | GOLD A (Group C changing to group A):  65 (9)  GOLD A (Group A remaining in group A):  68 (7)  GOLD B (Group D changing to group B):  71 (8)  GOLD B (Group B remaining in group B):  69 (8) | GOLD A (Group C changing to group A):  13 (39%)  GOLD A (Group A remaining in group A):  75 (48%)  GOLD B (Group D changing to group B):  42 (44%)  GOLD B (Group B remaining in group B):  65 (44%)a | Smoking history  Group C Changing to group A:  9 (27%)  Group A remaining in group A:  50 (32%)  Group D changing to group B:  24 (25%)  Group B remaining in group B:  41 (28%) | Group C changing to group A  Asthma: 36%  Chronic bronchitis: 18%  Heart disease: 6%  Hypertension: 33%  Diabetes: 9%  Anxiety/ depression: 18%  Group A remaining in group A  Asthma: 26%  Chronic bronchitis: 13%  Heart disease: 16%  Hypertension: 40%  Diabetes: 8%  Anxiety/ depression: 15%  Group D changing to group B  Asthma: 29%  Chronic bronchitis: 44%  Heart disease: 20%  Hypertension: 54%  Diabetes: 13%  Anxiety/ depression: 20%  Group B remaining in group B  Asthma: 30%  Chronic bronchitis: 37%  Heart disease: 25%  Hypertension: 52%  Diabetes: 10%  Anxiety/ depression: 29% | NR/NR/NR/NR |
| Hogman 2018 [34] | 2014 and 2017 (Assuming GOLD 2014 to be an update of GOLD 2013) | GOLD A and  GOLD B | 571  Primary and secondary care outpatient | 155 (27.1%)a | 148 (26%)a | GOLD A:  68 (7)  GOLD B:  69 (8) | GOLD A:  75 (48%)a  GOLD B:  65 (44%)a | Smoking history:  50 (32%)/ 41 (28%) | Asthma: 26%/30%  Chronic bronchitis: 13%/37%  Heart disease: 16%/25%  Hypertension: 40%/52%  Diabetes: 8%/10%  Anxiety/ depression: 15%/ 29% | NR/NR/NR/NR |
| Leivseth 2013 [50] | 2013 | GOLD A and  GOLD B | 1540  NR | Women:  278 (59.4%)  Men:  453 (61.6%) | Women:  100 (21.4%)  Men:  116 (15.8%) | Women  GOLD A:  61.9 (13.9)  GOLD B:  62.3 (12.2)  Men  GOLD A:  62.8 (12.9)  GOLD B:  66.2 (11.7) | GOLD A:  453 (61.6%)  GOLD B:  116 (15.8%) | Ever smoked  Women  179 (69.4%)/ 75 (77.3%)  Men:  371 (85.5%)/ 109 (95.6%) | CVD  Women: 11.2%/13%  Men: 17.7%/35.3% | NR/NR/NR/NR |
| Tashiro 2020 [76] | GOLD criteria is not explicitly stated in the study but was mapped directly from exacerbations. | Indirect mapping GOLD AB combined | 481  NR | GOLD A/B combined  Non-exacerbators: 393 (81.7%)a  Infrequent exacerbators: 61 (12.7%)a | GOLD A/B combined  Non-exacerbators: 393 (81.7%)a  Infrequent exacerbators: 61 (12.7%)a | GOLD A/B combined  Non-exacerbators: 71.6 (0.4)  Infrequent exacerbators: 74.0 (1.2) | GOLD A/B combined  Non-exacerbators: 371 (94.4%)a | NR/NR | GOLD A/B combined  Non-exacerbators  Hypertension: 47.1%  Diabetes mellitus: 19.7%  Hyperlipidaemia15.4%  CVD: 15.4%.  Infrequent exacerbators-Hypertension: 49.2%  Diabetes mellitus: 16.4%  Hyperlipidaemia19.7%  CVD: 31.2% | NR/NR/NR/NR |
| Yeung 2016 [81] | 2013 | GOLD A and  GOLD B | 139  Primary care | According to CAT:  73 (52.5%)  According to mMRC:  72 (51.8%) | According to CAT:  34 (24.5%)  According to mMRC:  35 (25.2%) | Overall population (GOLD A/B/C/D):  73.4 (10.3) | Overall population (GOLD A/B/C/D):  119 (85.6%) | NR/NR | NR/NR | NR/NR/NR/NR |
| Nurwidhiyasari 2019 [62] | 2017 | GOLD A and  GOLD B | 200  Hospital outpatient | 35 (17.5%)a | 95 (47.5%)a | GOLD A:  58.9 (Range: 22–77)  GOLD B: 61.44 (Range: 36–84) | GOLD A: 20 (10%)  GOLD B: 58 (29%) | Smoking habits:  14 (7.0%)/ 46 (23.0%)  No smoking habits:  21 (10.5%)/ 49 (24.5%) | No comorbidity: 6.5%/19.5%  1 comorbidity: 6%/17%  > 1 comorbidity: 5%/11% | NR/NR/NR/NR |
| Horner 2020 [35] | 2019 (Assuming it to be an update of GOLD 2017) | GOLD A and  GOLD B | 850  Hospital outpatient | NR | NR | Overall population (GOLD A/B/C/D):  66.2 (0.3) | Overall population (GOLD A/B/C/D):  534 (62.8%) | NR/NR | NR/NR | NR/NR/NR/NR |
| Kamusheva 2017 [43] | 2015 (Assuming it to be an update of GOLD 2013) | GOLD A and  GOLD B | 426  NR | 30 (7.06%) | 149 (35.06%) | NR | Overall population (GOLD A/B/C/D):  296 (69.48%) | NR/NR | ≥ 2 diseases: 50%/66.4%  Only 1 disease: 33.3%/18.8%  No comorbidity: 16.7%a/14.8%a | NR/NR/NR/NR |
| Palmiotti 2018 [65] | 2015 (Assuming it to be an update of GOLD 2013) | GOLD A and  GOLD B | 693  Hospital inpatient and outpatient | 142 (20.60%) | 238 (32.30%) | Overall population (GOLD A/B/C/D):  71 (9) | Overall population (GOLD A/B/C/D):  589 (85%)a | NR/NR | NR/NR | NR/NR/NR/NR |
| Price 2016 [68] | 2016 (Study does not report GOLD year obtained year from Reference 3 in publication’s bibliography Assuming it to be an update of GOLD 2013) | GOLD A and  GOLD B | 2217  Primary care | 803 (36.9%) | 461 (21.2%) | NR | Overall population (GOLD A/B/C/D): 1229 (55.4%) | NR/NR | Asthma: 16.7%/17.6%a  Rhinitis: 8.5%/7.8% (Calculated)  GERD: 8.8%/9.8% (Calculated)  Ischaemic heart disease: 11.6%/23% (Calculated)  Heart failure: 5.1%/11.7% (Calculated)  Anxiety/ depression: 26.7% /25.2% (Calculated)  Osteoporosis: 10.5%/14.3%  CKD: 14.2%/20.8%  Diabetes (Type 1 and Type 2): 19.1%/28.9%  Pneumonia: 5.5%/5.4% | NR/NR/NR/NR |
| Golpe 2015 [27] | 2014 (Assuming it to be an update of GOLD 2013) | GOLD A and  GOLD B | 612  Hospital outpatient | 159 (25.9 %)  Biomass group:  36 (25.3 %)  Tobacco group:  123 (26.2 %) | 104 (17.0 %)  Biomass group:  43 (30.3 %)  Tobacco group:  61 (12.9 %) | Overall population (GOLD A/B/C/D):  69.7 (9.8) | Overall population (GOLD A/B/C/D):  491 (80.2 %) | NR/NR | NR/NR | NR/NR/ > 1: 289 (47.2%) |
| Sundh 2017 [75] | 2017 | GOLD A and  GOLD B | 2014 Overall Cohort (GOLD A/B/C/D): 1329  Primary and secondary care outpatient and inpatient | n' Not reported (21%) | n' Not reported (45%) | NR | 2014 Overall cohort (GOLD A/B/C/D):  584 (44%) | NR/NR | NR/NR | NR/NR/NR/NR |
| Zeng 2020 [82] | 2017 | GOLD A and  GOLD B | 4796  Hospital outpatient | 321 (8.0%) | 2219 (55.5%) | Overall population (GOLD A/B/C/D):  64.5 (8.9) | Overall population (GOLD A/B/C/D): 4205 (87.7%) | NR/NR | NR/NR | NR/NR/NR/NR |
| Moya-Álvarez 2020 [60] | 2017 | GOLD A and  GOLD B | 169  Primary care | Based on CAT: 61 (36.1%)  Based on mMRC:  108 (63.9%) | Based on CAT: 65 (38.5%)  Based on mMRC:  18 (10.7%) | Overall population (GOLD A/B/C/D): 67.64 (9.77) | Overall population (GOLD A/B/C/D):  116 (68.6%) | NR/NR | NR/NR | NR/NR/NR/NR |
| Ierodiakonou 2020 [38] | 2019 (Assuming it to be an update of GOLD 2017) | GOLD A and  GOLD B | 257  Primary care | Based on CAT:  11 (5.4%)  Based on mMRC:  57 (27.5%) | Based on CAT:  115 (56.4%)  Based on mMRC:  71 (34.3%) | Overall population (GOLD A/B/C/D):  65 (12.3) | Overall population (GOLD A/B/C/D):  204 (79.4%) | NR/NR | Based on CAT:  At least 2 comorbidities: 45.5%/75.5% | NR/NR/NR/NR |
| Hussey 2020 [37] | 2017 (Abstract does not report GOLD year Since published in 2020, assuming GOLD 2017) | GOLD A and  GOLD B | Real-world population: 569  RCT population: 72  Real-world population meeting RCT eligibility: 129 | NR | NR | NR | NR | NR/NR | NR/NR | NR/NR/NR/NR |
| Kobayashi 2018 [45] | 2013 and 2017 | GOLD A and  GOLD B | 401  NR | GOLD 2013: 206 (51.4%)a  GOLD 2017: 240 (59.9%) | GOLD 2013: 67 (16.7%)a  GOLD 2017: 122 (30.4%) | GOLD A:  73.3 (6.8)  GOLD B:  77.8 (7.6) | GOLD A:  216 (90.0%)  GOLD B:  110 (90.2%) | NR/NR | NR/NR | NR/NR/NR/NR |
| Le 2019 [48] | 2017 | GOLD A and  GOLD B | 921  NR | 225 (24.7%) | 476 (52.2%) | GOLD A:  62 (9)  GOLD B:  66 (10) | GOLD A: (66%)  GOLD B: (61%) | Current smoker: 59%/46% | Heart attack/angina: 12%/19% | NR/NR/NR/NR |
| Graf 2018 [28] | 2017 | GOLD A and  GOLD B | 2281  Unclear | Based on mMRC:  878 (38.5%)  Based on CAT:  247 (10.8%) | Based on mMRC:  576 (25.3%)  Based on CAT:  1207 (52.9%) | Overall population (GOLD A/B/C/D):  65.1 (8.4) | Overall population (GOLD A/B/C/D): (61%)a | NR/NR | NR/NR | NR/NR/NR/NR |
| Hsieh 2018 [36] | 2017 | GOLD A and  GOLD B | 1053  Hospital outpatient | 245 (23.3%) | 666 (63.2%) | Overall population (GOLD A/B/C/D):  72.8 (9.6) | Overall population (GOLD A/B/C/D):  995 (94.5%) | NR/NR | NR/NR | NR/NR/NR/NR |
| Song 2018 [72] | 2017 | GOLD A and  GOLD B | 1880  Unclear | 335 (17.8%) | 701 (37.5%) | GOLD A:  68.5 (9.1)  GOLD B:  69.8 (9.1) | GOLD A:  308 (96.3%)  GOLD B:  601 (92.5%) | NR/NR | NR/NR | NR/NR/NR/NR |
| 2017 | GOLD A and  GOLD B | 1880  Unclear | 418 (22.2%) | 1150 (61.2%) | GOLD A [Migrated in GOLD A from GOLD C (2013)]:  69.0 (9.2)  GOLD B [Migrated in GOLD B from GOLD D (2013)]:  68.3 (8.0) | GOLD A [Migrated in GOLD A from GOLD C (2013)]:  73 (92.4%)  GOLD B [Migrated in GOLD B from GOLD D (2013)]:  390 (96.5%) | NR/NR | NR/NR | NR/NR/NR/NR |
| Ding 2018 [18] | 2017 | GOLD A and  GOLD B | 1775  Unclear | 257 (14.8%) | 812 (46.6%) | Overall population (GOLD A/B/C/D):  65.2 (SD Not reported) | Overall population (GOLD A/B/C/D):  978 (55.1%) | NR/NR | NR/NR | NR/NR/NR/NR |
| Rajnoveanu 2020 [70] | 2017 | GOLD A and  GOLD B | 348  Hospital outpatient | 21 (6.03%) | 143 (41.09%) | Overall population (GOLD A/B/C/D): 68.61 (10.61) | Overall population (GOLD A/B/C/D):  252 (72.41%) | Current smoker: 28.57%/ 17.48% | NR/NR | NR/NR/NR/NR |
| Dua 2019 [20] | 2017 | GOLD A and  GOLD B | 413  NR | (48.9%) | (36.9%) | NR | NR | NR/NR | NR/NR | NR/NR/NR/NR |
| Mehta 2014 [56] | 2013 | GOLD A and  GOLD B | 59  Hospital outpatient | 10 (16.9%)a | 11 (18.6%)a | GOLD A:  63.4 (7.3)  GOLD B:  58.5 (9.7) | GOLD A:  9 (90%)  GOLD B:  11 (100%)a | Current smoker:  4 (40%)a/ 4 (36.4%)a | Psychiatric illness: 0%/9.1%  Depression: 10%/45.5%  Anxiety: 10%/27.3%a | NR/NR/NR/NR |
| Radovanovic 2019 [69] | 2017 | GOLD A and  GOLD B | 1360  Hospital outpatent | 285 (22.4%) | 391 (30.7%) | Overall population (GOLD A/B/C/D): 73 (IQR 66–79) | Overall population (GOLD A/B/C/D):  998 (73.4%) | NR/NR | NR/NR | NR/NR/NR/NR |

ACOS = asthma-COPD overlap syndrome, CAD = coronary artery disease, CAT = COPD Assessment Test, CHF = congestive heart failure, CKD = chronic kidney disease, COPD = chronic obstructive pulmonary disease, CV = cardiovascular, CVD = cardiovascular disease, GERD = gastroesophageal reflux disease, GI = gastrointestinal, GOLD = Global Initiative for Chronic Obstructive Lung Disease, ICS = inhaled corticosteroid, IQR = interquartile range, MI = myocardial infarction, mMRC = modified Medical Research Council, NA = not applicable, NR = not reported, PVD = peripheral vascular disease, RCT = randomised controlled trial,
SD = standard deviation, SGRQ = St. George’s Respiratory Questionnaire.

aCalculated.

# Supplementary Table S15 Exacerbation outcomes

| **Publication** | **GOLD classification** | **Study Population** | **Sample size, n** | **GOLD A and GOLD B, %** | **Specific clinical outcome** | **Exposure for exacerbations**  **GOLD A/B** | **Exacerbation outcomes** | **Exacerbations HR/OR/RR  (95% CI)** |
| --- | --- | --- | --- | --- | --- | --- | --- | --- |
| Bhatt 2016 [2] | GOLD 2013 | GOLD A and GOLD B | 3464 | GOLD A: 20.8a  GOLD B 24.7a | Rate of exacerbation | NR | NR | With vs without beta-bIocker  RR  GOLD A: Total exacerbation: 2.02 (1.20–3.38), p = 0.008  GOLD B: Total exacerbation: 0.45 (0.28–0.72), p = 0.002.  Severe exacerbation: 0.27 (0.09–0.76), p = 0.014 |
| Chen 2015 [11] | GOLD 2013 | GOLD A and GOLD B | 262 | GOLD A: 22  GOLD B: 23.4 | 1-year exacerbation rate | Worse GOLD group of COPD severity, as defined by 2013, 2017 or 2020 criteria (among those in the A/B cohort) | NR | OR  GOLD A: 1 (ref)  GOLD B: Total exacerbations: 1.7 (0.6–4.3),  p = 0.30.  Severe exacerbations: 3.5 (0.9–13.5),  p = 0.07 |
| Cho 2019 [13] | GOLD 2017 | GOLD A only | 340 | GOLD A: 100%  GOLD B: 0% | Incidence rates of moderate or severe exacerbations | Worse GOLD group of COPD severity, as defined by 2013, 2017 or 2020 criteria (among those in the A/B cohort) | GOLD A  **Past exacerbations**  Patients on Regular treatment, number of moderate or severe exacerbations: 117  No regular treatment number of moderate or severe exacerbations: 116 | Regular treatment vs without regular treatment  IRR  GOLD A  Before Propensity score matchingb  Regular treatment:  0.42 (0.31–0.53)  No regular treatment:  0.27 (0.18–0.37)  IRR:  1.54 (1.00–2.37)  Post-matching propensity scoreb  Regular treatment: 0.39 (0.22 to 0.55)  No regular treatment:  0.31 (0.18 to 0.44)  IRR:  1.24 (0.68–2.25) |
| Choi 2018 [14] | GOLD 2017 | GOLD B only | 2010 | GOLD A: 21.5%  GOLD B: 62.7% | Number of exacerbations in GOLD B patients | Worse GOLD group of COPD severity, as defined by 2013, 2017 or 2020 criteria (among those in the A/B cohort) | GOLD A: NR  GOLD B: mean exacerbation in last 1 year:  0.09 (0.29)  (The frequency of exacerbations during the previous 1 year was lower in the GOLD B group than in the GOLD D group) | GOLD A: NR  GOLD B: multivariate analysis, present Age, mMRC and SGRQ-S  scores, and the % predicted FEV1 were significantly associated with progression from GOLD B to GOLD D at 1 year in the KOCOSS cohort  Severe symptoms, poorer health status, and greater airflow limitation increased patients’ risk of exacerbation and progression from group B to group D when the 2017 GOLD criteria were applied. (after adjusting for sex, BMI, the presence of chronic bronchitis, the SGRQ-A, SGRQ total and CAT scores, a history of GERD, and exacerbation frequency at baseline) |
| Casanova 2014 [7] | GOLD 2013 | GOLD A and GOLD B | 828 | GOLD A: 17.8%  GOLD B: 37.9% | Proportion of patients experiencing  ≥ 2 COPD exacerbations | Worse GOLD group of COPD severity, as defined by 2013, 2017 or 2020 criteria (among those in the A/B cohort) | Patients experiencing  ≥ 2 exacerbations (1 year changes following index)  GOLD A: 3.3%  GOLD B: 6.7% | NR |
| Faner 2018 [23] | GOLD 2017 | GOLD A and GOLD B | 2101 | GOLD A: NR  GOLD B NR | Proportion of patients with change in exacerbation rate  3-year follow-up | Worse GOLD group of COPD severity, as defined by 2013, 2017 or 2020 criteria (among those in the A/B cohort) | Increase in exacerbation  GOLD A: 12%  GOLD B: 24% | NR |
| Jung 2015 [41] | GOLD 2013 | GOLD A and GOLD B | 118 | GOLD A: 22.9%  GOLD B: 38.1% | NR | NR | NR | Multivariate analysis revealed that no parameter was significantly associated with acute moderate exacerbation in low risk group (GOLD A and B) |
| Kupryś-Lipińska 2014 [46] | GOLD 2013 | GOLD A and GOLD B | 2967 Number of question-naires analysed | GOLD A: 52.67%  GOLD B: 10.72% | NR | NR | NR | Exacerbations were more frequently reported by past smokers, irrespective of sex |
| Marçôa 2018 [55] | GOLD 2017 | GOLD A and GOLD B | 200 | GOLD A: 21%  GOLD B: 50% | Proportion of patients with one or more exacerbations during the year of follow-up | Worse GOLD group of COPD severity, as defined by 2013, 2017 or 2020 criteria (among those in the A/B cohort) | Exacerbations  GOLD A:  12 (28.6%)  GOLD B:  42 (42%) | Univariate analysis  OR  GOLD A: 1 (ref)  GOLD B:  1.15 (0.33–4.02), p = 0.002 |
| Marçôa 2018 [55] | GOLD 2017 | GOLD A and GOLD B | 200 | Proportion of patients with one or more exacerbations during the year of follow-up |  | Poorer lung function as measured by FEV1, expressed as % predicted | GOLD B  Patients with FEV1 ≥ 50%: 57.7%,  FEV1 < 50%: 25% | NR |
| Merinopoulou 2016 [58] | GOLD 2013 | GOLD A and GOLD B | 44,201 | GOLD A: 28.3%  GOLD B: 17.5% | Annual rate of exacerbations at study start (2011) | Worse GOLD group of COPD severity, as defined by 2013, 2017 or 2020 criteria (among those in the A/B cohort) | Rate per person-year:  GOLD A:  0.69 (0.67–0.71)  GOLD B:  1.01 (0.98–1.04)  (p = significant, value NR) | NR |
| Annual rate of exacerbations in 2012 | Worse GOLD group of COPD severity, as defined by 2013, 2017 or 2020 criteria (among those in the A/B cohort) | Rate per  person-year  GOLD A:  0.87 (NR)  GOLD B:  1.21 (NR)  (p = significant, value NR) | NR |
| Annual rate of exacerbations at study end (2013) | Worse GOLD group of COPD severity, as defined by 2013, 2017 or 2020 criteria (among those in the A/B cohort) | Rate per  person-year  GOLD A:  0.97 (0.94–1.00)  GOLD B:  1.33 (1.28–1.38)  (p = significant, value NR) | NR |
| Rate of exacerbations during the follow-up period (per person-year) | Worse GOLD group of COPD severity, as defined by 2013, 2017 or 2020 criteria (among those in the A/B cohort) | Rate per  person-year  GOLD A:  0.83 (0.81–0.85)  GOLD B:  1.17 (1.14–1.19) | NR |
| Plutinsky 2019 [66] | More than one GOLD criteria used | GOLD A and GOLD B | 720 | GOLD A:  4.9%  GOLD B: 20.8% | Risk of exacerbations based on pre 2017 classification  (48 months) | Worse GOLD group of COPD severity, as defined by 2013, 2017 or 2020 criteria (among those in the A/B cohort) | GOLD A:  7 (20%)  GOLD B:  43 (28.7%) | Risk of exacerbation:  GOLD A: 25.8%  GOLD B: 57.3% |
| Probability of not having experienced a first exacerbation based on pre 2017 classification at 12 months | Worse GOLD group of COPD severity, as defined by 2013, 2017 or 2020 criteria (among those in the A/B cohort) | NR | Probability of not having experienced a first exacerbation at 12 months  GOLD A: 0.912 (0.816–1.000)  GOLD B: 0.864 (0.807–0.921)  (p < 0.001 across GOLD groups) |
| Probability of not having experienced a first exacerbation based on pre 2017 classification at 24 months | Worse GOLD group of COPD severity, as defined by 2013, 2017 or 2020 criteria (among those in the A/B cohort) | NR | Probability of not having experienced a first exacerbation at 24 months  GOLD A: 0.848 (0.725–0.971)  GOLD B: 0.717 (0.634–0.801)  (p < 0.001 across GOLD groups) |
| Probability of not having experienced a first exacerbation based on pre 2017 classification at 36 months | Worse GOLD group of COPD severity, as defined by 2013, 2017 or 2020 criteria (among those in the A/B cohort) | NR | Probability of not having experienced a first exacerbation at 36 months:  GOLD A: 0.809 (0.670–0.948)  GOLD B: 0.656 (0.561–0.752)  (p < 0.001 across GOLD groups) |
| Probability of not having experienced a first exacerbation based on pre 2017 classification at 48 months | Worse GOLD group of COPD severity, as defined by 2013, 2017 or 2020 criteria (among those in the A/B cohort) | NR | Probability of not having experienced a first exacerbation at 48 months  GOLD A: 0.742 (0.562–0.921)  GOLD B: 0.427 (0.244–0.610)  (p < 0.001 across GOLD groups) |
| GOLD A:  8.5%  GOLD B: 52.8% | Risk of exacerbations based on 2017 classification (48 months) | Worse GOLD group of COPD severity, as defined by 2013, 2017 or 2020 criteria (among those in the A/B cohort) | GOLD A:  15 (24.6%)  GOLD B:  138 (36.3%) | Risk of exacerbation  GOLD A: 29.5%  GOLD B: 55.3% |
| Probability of not having experienced a first exacerbation based on 2017 classification at 12 months | Worse GOLD group of COPD severity, as defined by 2013, 2017 or 2020 criteria (among those in the A/B cohort) | NR | Probability of not having experienced a first exacerbation at 12 months  GOLD A: 0.896 (0.818–0.975)  GOLD B: 0.810 (0.769–0.851)  (p < 0.001 across GOLD groups) |
| Probability of not having experienced a first exacerbation based on 2017 classification at 24 months | Worse GOLD group of COPD severity, as defined by 2013, 2017 or 2020 criteria (among those in the A/B cohort) | NR | Probability of not having experienced a first exacerbation at 24 months  GOLD A: 0.764 (0.651–0.877)  GOLD B: 0.641 (0.586–0.696)  (p < 0.001 across GOLD groups) |
| Probability of not having experienced a first exacerbation based on 2017 classification at 36 months | Worse GOLD group of COPD severity, as defined by 2013, 2017 or 2020 criteria (among those in the A/B cohort) | NR | Probability of not having experienced a first exacerbation at 36 months  GOLD A: 0.741 (0.623–0.859)  GOLD B: 0.551 (0.489–0.612)  (p < 0.001 across GOLD groups) |
| Probability of not having experienced a first exacerbation based on 2017 classification at 48 months | Worse GOLD group of COPD severity, as defined by 2013, 2017 or 2020 criteria (among those in the A/B cohort) | NR | Probability of not having experienced a first exacerbation at 48 months  GOLD A: 0.705 (0.574–0.837)  GOLD B: 0.447 (0.359–0.535)  (p < 0.001 across GOLD groups) |
| Thomsen 2013 [77] | GOLD 2013 | GOLD A and GOLD B | 6574 | GOLD A: 77.4%  GOLD B: 14.1% | Risk of having exacerbations | Worse GOLD group of COPD severity, as defined by 2013, 2017 or 2020 criteria (among those in the A/B cohort) | GOLD A/B combined, patients with ≥ 1 exacerbation during follow-up: 651a  Patients with frequent exacerbations during follow-up: 238a  Absolute risk of having frequent exacerbations in those with 3 high biomarkers (vs no high biomarkers): 24% | Risk of frequent exacerbations over 5 years  Adjusted HR stratified by no. of high inflammatory biomarkers (0–3 C-reactive protein (CRP), fibrinogen, and leukocytes) for combined GOLD A/B population  Risk of having at least 1 exacerbation  0: 1 [Reference]  1: 1.2 (1.0–1.5)  2: 1.5 (1.3–1.9)  3: 1.7 (1.3–2.3),  p = 2 x 10-6  Risk of having frequent exacerbations:  0: 1 [Reference]  1: 1.4 (1.0–2.0)  2: 1.9 (1.4–2.7)  3: 2.6 (1.7–4.0)  p = 2 x 10-6 [Adjusted for age (as time scale), sex, FEV in 1 second percent predicted, smoking, use of any inhaled medication, BMI, history of frequent exacerbations, and time since most recent prior exacerbation] |
| Risk of having at least 1 exacerbation and having frequent exacerbations (Frequent exacerbations defined as ≥ 2, less than 1 year apart) | More frequent mild (self-managed) or moderate (outpatient-treated) exacerbations | GOLD A/B combined Patients with no history of frequent exacerbations in past year: 6439a  No. of patients with a history of frequent exacerbations in past year: 127a  No. of patients with ≥ 1 exacerbation during follow-up who had no history of frequent exacerbations: 826a  No. of patients with ≥ 1 exacerbations during follow-up who had a history of frequent exacerbations: 105a  No. of patients with frequent exacerbations during follow-up who had no history of frequent exacerbations: 331a  No. of patients with frequent exacerbations during follow-up who had a history of frequent exacerbations: 92a  Absolute 5-year risk of having frequent exacerbations in those with 3 high biomarkers (vs no high biomarkers) in patients with no history of frequent exacerbations: 64%  Absolute 5-year risk of having frequent exacerbations in those with 3 high biomarkers (vs no high biomarkers) in patients with a history of frequent exacerbations: 98% | Adjusted HR stratified by no. of high inflammatory biomarkers (0–3)  Risk of having  ≥ 1 exacerbation in patients with no history of frequent exacerbations  0: 1 [Reference]  1: 1.2 (1.0–1.4)  2: 1.4 (1.2–1.7)  3: 1.9 (1.5–2.4)  p-value for trend: 4 x 10-8  Risk of having  ≥1 exacerbation in patients with a history of frequent exacerbations  0: 1 [Reference]  1: 1.0 (0.5–2.2)  2: 0.8 (0.4–1.6)  3: 1.7 (0.8–4.0)  p-value for trend: 0.32  Risk of having frequent exacerbations in patients with no history of frequent exacerbations  0: 1 [Reference]  1: 1.5 (1.2–2.0)  2: 1.6 (1.2–2.2)  3: 2.5 (1.7–3.6)  p-value for trend: 1 x 10-6  Risk of having frequent exacerbations in patients with a history of frequent exacerbations  0: 1 [Reference]  1: 0.8 (0.4–1.6)  2: 1.1 (0.5–2.2)  3: 1.8 (1.0–3.6)  p-value for trend: 0.07  [Adjusted for age (as time scale), sex, forced expiratory volume in 1 second percent predicted, smoking, use of any inhaled medication, body mass index, history of frequent exacerbations, and time since most recent prior exacerbation] |
| Vestbo 2019 [78] | GOLD 2017 | GOLD B only | 1528 | GOLD A:  12%  GOLD B: 61.1% | Exacerbations (severe) | Worse GOLD group of COPD severity, as defined by 2013, 2017 or 2020 criteria (among those in the A/B cohort) | GOLD A: NR  GOLD B  Patients with a history of severe exacerbations in last 12 months  N = 935 (100%) patients without a history of severe exacerbations in last 12 months.  78.5% Patients without a history of moderate/severe exacerbations  21.5% patients with a history of 1 moderate/severe exacerbation in last 12 months. | NR |
| Yazar 2020 [80] | GOLD 2017 | GOLD A and GOLD B | 251 | GOLD A: 31.9%  GOLD B: 25.1% | Moderate/severe number of exacerbations | Worse GOLD group of COPD severity, as defined by 2013, 2017 or 2020 criteria (among those in the A/B cohort) | Exacerbations in previous year (moderate and severe) [Mean (SD)]  GOLD A: 0.3 (0.5)  GOLD B: 0.3 (0.6) | NR |
| Criner 2019 [15] | GOLD 2017 | GOLD A and GOLD B | 4469 | GOLD A  mMRC: 37%  SGRQ: 32.1%  GOLD B  mMRC: 36.3%  SGRQ: 41.2% | Exacerbations | Worse GOLD group of COPD severity, as defined by 2013, 2017 or 2020 criteria (among those in the A/B cohort) | Annual rate, Mean (SD)  mMRC:  GOLD A: 0.2 (0.6)  GOLD B0.6 (1.1)  SGRQ:  GOLD A: 0.2 (0.6)  GOLD B: 0.2 (1.6)  GOLD B based on mMRC: GOLD B based on SGRQ: | HR  GOLD A: 1 (Ref)  GOLD A vs B based on mMRC: 2.7 (2.4–3)  GOLD A vs B based on SGRQ: 3.1 (2.7–3.6) [adjusted for demographics, cardiovascular comorbidities, cardiovascular risk factors, musculoskeletal disease, and asthma] |
| Ocheltree 2019 [63] | GOLD 2017 | GOLD A and GOLD B | 2981 | GOLD A: NR  GOLD B  mMRC: 12.08%  CAT:  36.68% | Proportion of exacerbation-free patients | Worse GOLD group of COPD severity, as defined by 2013, 2017 or 2020 criteria (among those in the A/B cohort) | NR | Rate of exacerbation (not requiring hospitalisation)  GOLD A (remained in GOLD A using mMRC and CAT): 69.18%  GOLD B (shifted from mMRC GOLD A to CAT GOLD B): 55.71%  p-value for comparison with GOLD A (remained in GOLD A using mMRC and CAT): < 0.0001 |
| Proportion of severe exacerbation-free patients | Worse GOLD group of COPD severity, as defined by 2013, 2017 or 2020 criteria (among those in the A/B cohort) | NR | Rate of severe exacerbation (requiring hospitalisation)  GOLD A (remained in GOLD A using mMRC and CAT): 95.54%  GOLD B (shifted from mMRC GOLD A to CAT GOLD B): 87.70%  p-value for comparison with GOLD A (remained in GOLD A using mMRC and CAT): 0.0002 compared to mMRC, |
| Frequency of exacerbations | Worse GOLD group of COPD severity, as defined by 2013, 2017 or 2020 criteria (among those in the A/B cohort) | GOLD A (remained in GOLD A using mMRC and CAT)  Number of exacerbations, Mean (SD):  0.3 (0.7)  GOLD B (shifted from mMRC GOLD A to CAT GOLD B)  Number of exacerbations, Mean (SD):  0.1 (0.4) | p-value for comparison of frequency of exacerbations in GOLD A (remained in GOLD A using mMRC and CAT) vs GOLD B (shifted from mMRC GOLD A to CAT GOLD B): < 0.0001 |
| Halpin 2019 [32] | GOLD 2017 | GOLD A and GOLD B | Cohort 1: 11,409  Cohort 2: 699 | GOLD 2014 GOLD A  Cohort 1: 44.3%,  Cohort 2: 45.2%  GOLD 2016  Cohort 1: 41.4%,  Cohort 2: 47.9%  GOLD B:  Cohort 1: 25.7%,  Cohort 2: 28.5%  GOLD 2016  Cohort 1: 28.1%  Cohort 2: 28.3% | Exacerbation rates | Worse GOLD group of COPD severity, as defined by 2013, 2017 or 2020 criteria (among those in the A/B cohort) | GOLD A, Mean exacerbations/y (SD)  Cohort 1  GOLD A: 0.3 (0.5)  GOLD B: 0.4 (0.5)  Cohort 2  GOLD A: 0.3 (0.5)  GOLD B: 0.4 (0.5) [Requiring/not requiring hospitalisation unclear]  GOLD A, Mean exacerbations/y (SD) over 2 years  Cohort 1  GOLD A: 0.7 (0.9)  GOLD B: 0.9 (1.0)  Cohort 2  GOLD A: 0.6 (0.8)  GOLD B: 1.0 (1.2) | RR  Cohort 1  GOLD A: 1 (Ref)  GOLD B:  1.42 (1.34–1.49)  Cohort 2  GOLD A: 1 (Ref),  GOLD B:  1.60 (1.29–1.97) [adjusted for age and sex] |
| Jones 2014 [40] | GOLD 2013 | GOLD A and GOLD B | 1041 | GOLD A  mMRC: 37.8%  CAT: 9.3%  GOLD B  mMRC: 20.1%  CAT: 48.5% | Exacerbations | Worse GOLD group of COPD severity, as defined by 2013, 2017 or 2020 criteria (among those in the A/B cohort) | Exacerbation that required Emergency department or hospitalisation, Based on CAT  GOLD A:  1 (1%)  GOLD B:  24 (4.7%)  Based on mMRC:  GOLD A: 9 (2.3%)  GOLD B:  16 97.6%)  Exacerbation frequency in the last 12 months, 0 exacerbations, Based on CAT  GOLD A:  83 (85.5%)  GOLD B:  368 (72.9%)  Based on mMRC:  GOLD A: 311 (79.1%)  GOLD B: 140 (67.0%) 1  Exacerbation, Based on CAT  GOLD A:  14 (14.4%)  GOLD B:  137 (27.1%)  Based on mMRC  GOLD A:  82 (20.9%)  GOLD B:  69 (33.0%)  ≥ 2 Exacerbations: Based on CAT:  0 (0%)  GOLD B: 0 (0%)  Based on mMRC: 0 (0%)  GOLD B: 0(0%) | NR |
| Lawrence 2017 [47] | GOLD 2013 | GOLD B only | 370 | GOLD A:  9.2%  GOLD B: 28.9% | NR | Worse GOLD group of COPD severity, as defined by 2013, 2017 or 2020 criteria (among those in the A/B cohort) | NR  GOLD B Median (Range): 0.0 (0.0–1.0) | HR/OR/RR  (95% CI) not reported  p-value between Groups B and D: < 0.0001 |
| Donaldson 2013 [19] | NR | Indirect mapping GOLD AB combined | 1832 | Infrequent-exacerbators (GOLD A/B combined): 70% | Exacerbations | More frequent mild (self-managed) or moderate (outpatient-treated) exacerbations | GOLD A and B combined  No. of exacerbations per patient per year at year 2 (requiring hospitalisation)  iFE stayed as iFE: 0.07  FE changed to iFE: 0.14  No. of exacerbations per patient per year at year 2 (treated with OCS only)  iFE stayed as iFE: 0.04  FE changed to iFE: 0.29 | Exacerbation rate at 2 years  Proportion of patients who stayed in iFE group: 1068 (83%)  Proportion of patients who changed from FE to iFE: 210 (39%)  Change in no. of exacerbations per patient per year between year 1 and year 2 (treated with OCS only)  iFE stayed as iFE: 0.04  FE changed to iFE: 0.06  (p < 0.001) |
| Oishi 2018 [64] | GOLD 2017 | GOLD A only | 1168 | GOLD 2017  GOLD A: 49%  mMRC grade 0 and no exacerbations: 15.3%  mMRC grade 0 and a history of one exacerbation: 3.0%  mMRC grade 1 no exacerbation history: 23.4%  mMRC grade 1 and a history of one exacerbation: 7%  GOLD B: 38.6% | Exacerbations | Worse GOLD group of COPD severity, as defined by 2013, 2017 or 2020 criteria (among those in the A/B cohort) | No. of exacerbations  GOLD A:  0.21 (0.40)  Proportion of patients with exacerbations  mMRC 0: 35 (16.4%)  mMRC 1: 82 (23.1%) and (combined data for group B–D) | HR/OR/RR not reported  p-value for comparison among group A and B–D: < 0.001  p-value for comparison among group mMRC 0 and mMRC 1: 0.054 (Study reported data for combined group B–D) |
| Han 2018 [33] | More than one GOLD criteria used | GOLD A and GOLD B | 553 | GOLD A: 28.4%  GOLD B: 33.6% | Exacerbations | Worse GOLD group of COPD severity, as defined by 2013, 2017 or 2020 criteria (among those in the A/B cohort) | Severe exacerbations, Mean (SD)  GOLD A:  0.13 (0.47)  GOLD B:  0.20 (0.58)  Total Exacerbations, Mean (SD)  GOLD A:  0.32 (0.83)  GOLD B:  0.51 (1.22) | OR  Total exacerbations  GOLD A: 1 (Ref)  GOLD B:  1.68 (0.91–3.11)  p = 0.10  Severe exacerbations  GOLD A: 1 (Ref)  GOLD B:  1.59 (0.75–3.40)  p = 0.228 |
| GOLD A: 25.9%  GOLD B: 23.1% | Exacerbations | Worse GOLD group of COPD severity, as defined by 2013, 2017 or 2020 criteria (among those in the A/B cohort) | NR | OR  Total exacerbations  GOLD A: 1 (Ref)  GOLD B: 1.72 (0.83–3.55)  p = 0.142  Severe exacerbations  GOLD A: 1 (Ref)  GOLD B:  1.68 (0.65–4.30)  p = 0.282 |
| Hogman 2018 [34] | More than one GOLD criteria used | GOLD A and GOLD B | 571 | GOLD A: 32.9%a  Group C changing to group A based on GOLD 2017 classification: 33  Group A remaining in group A: 155  GOLD B: 244 42.7%a  Group D changing to group B based on GOLD 2017 classification: 96  Group B remaining in group B: 148 | Frequency of exacerbations | Worse GOLD group of COPD severity, as defined by 2013, 2017 or 2020 criteria (among those in the A/B cohort) | Group C changing to group A:  8 (24%)  Group A remaining in group A:  29 (19%)  Group D changing to group B:  25 (26%)  Group B remaining in group B:  35 (4%) | NR |
| Tashiro 2020 [76] | GOLD 2017 | Indirect mapping GOLD AB combined | 481 | Non-exacerbators/ combined GOLD A/B: 81.7%a | Exacerbations | More frequent mild (self-managed) or moderate (outpatient-treated) exacerbations | Infrequent exacerbations in COPD patients (Overall cohort): 61 (12.7%)a | OR for significant predictors (frequent exacerbators vs non-exacerbators/ GOLD A)  Long-term oxygen therapy: 37.09 (3.95–348),  p < 0.01  Percentage of blood eosinophil: 1.64 (1.12–2.64)  p = 0.02 [Adjusted for other predictors included in multivariate analysis model: BMI, COPD Assessment Test, serum albumin (g/dl) FEV1 (%) LAMA and macrolide] |
| Infrequent exacerbators/ combined GOLD A/B: 12.7%a | Exacerbations | More frequent mild (self-managed) or moderate (outpatient-treated) exacerbations | GOLD A/B combined- Critical exacerbationc in Infrequent exacerbators:  4 (6.6%) | OR for significant predictors (Frequent exacerbators vs Infrequent exacerbators/GOLD B)  Critical exacerbation: 6.07 (1.06–36.67), p = 0.04  Mechanical ventilation use: 5.49 (1.19–25.19)  p = 0.03 [Adjusted for other predictors included in the multivariate model]  Percentage of blood eosinophil FEV1 (%) Long-term oxygen therapy Macrolide BMI CO2 retention] |
| Ierodiakonou 2020 [38] | GOLD 2017 | GOLD A and GOLD B | 257 | GOLD A:  CAT: 5.4%  mMRC: 27.5%  GOLD B  CAT: 56.4%  mMRC: 34.3% | Predictor of exacerbations | Worse GOLD group of COPD severity, as defined by 2013, 2017 or 2020 criteria (among those in the A/B cohort) | NR | Adjusted OR for association of poor adherence to inhalers with probability of having ≥ 2 exacerbations in the past year: 4.68 (1.51–4.44) p-value: 0.007 [Adjusted for gender, age and smoking status] |
| Kobayashi 2018 [45] | More than one GOLD criteria used | GOLD A and GOLD B | 401 | GOLD A: 59.9%  GOLD B: 30.4% | Frequency of exacerbations | Worse GOLD group of COPD severity, as defined by 2013, 2017 or 2020 criteria (among those in the A/B cohort) | GOLD A, Frequency of severe exacerbation in 1 year follow-up  GOLD A: 4 (1.7%)  GOLD B:  17 (13.9%)  Frequency of exacerbation in 1 year follow-up  GOLD A:  15 (6.4%)  GOLD B:  23 (18.9%) | OR  All exacerbations  GOLD A: 1 (Ref)  GOLD B: 2.95 (1.60–5.45)  Exacerbations leading to hospital admission  GOLD A: 1 (Ref)  GOLD B: 8.19 (2.82–23.8)  p-value GOLD A/B vs GOLD C/D: < 0.001 |
| Exacerbations | Worse GOLD group of COPD severity, as defined by 2013, 2017 or 2020 criteria (among those in the A/B cohort) | Low risk group (GOLD A/B), Frequency of exacerbations during previous year: 0.072 (0.259) events per person per year | NR |
| Kobayashi 2018 [45] | More than one GOLD criteria used | GOLD A and GOLD B | 401 | GOLD A: 59.9%  GOLD B: 30.4% | Exacerbations | Worse GOLD group of COPD severity, as defined by 2013, 2017 or 2020 criteria (among those in the A/B cohort) | Frequency of exacerbations during previous year  GOLD A/C:  0.14 (0.17)  GOLD B/D:  0.25 (0.23) events per person per year | NR |
| Song 2018 [72] | More than one GOLD criteria used | GOLD A and GOLD B | 1880 | GOLD A: 17.8%  GOLD B: 37.5% | Exacerbations | Worse GOLD group of COPD severity, as defined by 2013, 2017 or 2020 criteria (among those in the A/B cohort) | Total moderate-to-severe exacerbation rate in the year prior to enrolment, Mean (SD)  GOLD A:  0.2 (0.7)  GOLD B:  0.07 (0.26) | OR  Risk of AECOPD  GOLD A: 1 (Ref)  GOLD B: 2.5 (1.4–4.4)  p = 0.001  IRR  Prospective total moderate-to-severe annual exacerbation rate:  GOLD A: 1 (Ref)  GOLD B:  3.1 (1.8–5.2)  p = < 0.001 [Adjusted for age, sex, body mass index, and pack-years] |
| GOLD A: 22.2%  GOLD B: 61.2% | Exacerbations | Worse GOLD group of COPD severity, as defined by 2013, 2017 or 2020 criteria (among those in the A/B cohort) | Total moderate-to-severe exacerbation rate in the year prior to enrolment, Mean (SD)  GOLD A [Migrated in GOLD A from GOLD C (2013)]: 0.5 (1)  GOLD B [Migrated in GOLD B from GOLD D (2013)]: 0.09 (0.29) | OR  Risk of AECOPD  GOLD A: 1 (Ref)  GOLD B:  2.4 (1.5–3.6)  p = < 0.001  IRR, Prospective total moderate-to-severe annual exacerbation rate  GOLD A: 1 (Ref)  GOLD B: 2.4 (1.6–3.5)  p = < 0.001 [Adjusted for age, sex, body mass index, and pack-years] |

AECOPD = Acute exacerbations of chronic obstructive pulmonary disease, CAT = COPD Assessment Test, COPD = chronic obstructive pulmonary disease,
FEV1 = forced expiratory volume in one second, GOLD = Global Initiative for Chronic Obstructive Lung Disease, HR = hazard ratio, iFE = infrequent exacerbation, mMRC = modified Medical Research Council, OR = odds ratio, RR = relative risk, Ref = reference.

**a**Calculated.

bAfter propensity score matching, there were 107 patient pairs, with and without regular inhaled treatment, who were followed up for mean times of 2.6 and 3.1 years, respectively.

cA critical exacerbation was defined as one with a fatal outcome.

**Supplementary Table S16** Exacerbation outcomes (indirect mapping)

| **Publication** | **GOLD classification** | **Study Population** | **Sample size, n** | **GOLD A and  GOLD B, %** | **Specific clinical outcome** | **Exposure for exacerbations**  **GOLD A/B** | **Data reported for exacerbations**  **GOLD A/B** | **Exacerbations OR (95% CI)**  **GOLD A/B** |
| --- | --- | --- | --- | --- | --- | --- | --- | --- |
| Donaldson 2013 [19] | NR | Indirect mapping GOLD AB combined | 1832 | Infrequent-exacerbators (GOLD A/B combined): 70% | Exacerbations | More frequent mild (self-managed) or moderate (outpatient-treated) exacerbations | GOLD A and B combined  No. of exacerbations per patient per year at year 2 (requiring hospitalisation)  iFE stayed as iFE: 0.07  FE changed to iFE: 0.14  No. of exacerbations per patient per year at year 2 (treated with OCS only)  iFE stayed as iFE: 0.04  FE changed to iFE: 0.29 | Exacerbation rate at  2 years  Proportion of patients who stayed in iFE group: 1068 (83%)  Proportion of patients who changed from FE to iFE: 210 (39%)  Change in no. of exacerbations per patient per year between year 1 and year 2 (treated with OCS only):  iFE stayed as iFE: 0.04  FE changed to iFE: 0.06 (p < 0.001) |
| Tashiro 2020 [76] | GOLD 2017 | Indirect mapping GOLD AB combined | 481 | Non-exacerbators/combined GOLD A/B: 81.7%a | Exacerbations | More frequent mild (self-managed) or moderate (outpatient-treated) exacerbations | Infrequent exacerbations in COPD patients (Overall cohort): 61 (12.7%)a | OR for significant predictors (Frequent exacerbators vs Non-exacerbators/GOLD A)  Long-term oxygen therapy: 37.09 (3.95–348), p < 0.01  Percentage of blood eosinophil:  1.64 (1.12–2.64),  p = 0.02 [Adjusted for other predictors included in multivariate analysis model: BMI COPD assessment test Serum albumin (g/dl) FEV1 (%) LAMA and Macrolide] |
|  |  |  | Infrequent exacerbators/combined GOLD A/B:12.7%a | Exacerbations | More frequent mild (self-managed) or moderate (outpatient-treated) exacerbations | GOLD A/B combined- Critical exacerbationb in Infrequent exacerbators:  4 (6.6%) | OR for significant predictors (Frequent exacerbators vs Infrequent exacerbators/GOLD B)  Critical exacerbation: 6.07 (1.06–36.67),  p = 0.04  Mechanical ventilation use: 5.49 (1.19–25.19), p = 0.03 [Adjusted for other predictors included in the multivariate model: Percentage of blood eosinophil FEV1 (%) Long-term oxygen therapy Macrolide BMI CO2 retention] |

CAT = COPD Assessment Test, FE = frequent exacerbation, GOLD = Global Initiative for Chronic Obstructive Lung Disease, FEV = forced expiratory volume, iFE = infrequent exacerbation, LAMA = long-acting muscarinic antagonist, MRC = modified Medical Research Council, OR = odds ratio.

aCalculated.

bA critical exacerbation was defined as one with a fatal outcome.

**Supplementary Table S17** Mortality outcomes

| **Publication** | **GOLD classification** | **Study Population** | **Sample size, n** | **GOLD A and GOLD B, %** | **Specific clinical outcome** | **Exposure for  GOLD A/B** | **Absolute Mortality, % GOLD A/B** | **Mortality HR/OR/RR  (95% CI)  GOLD A/B** | **Timepoint** |
| --- | --- | --- | --- | --- | --- | --- | --- | --- | --- |
| Gedebjerg 2018 [26] | GOLD 2017 | GOLD A and GOLD B | 33,765 | GOLD A: 17.7%  GOLD B: 28.4%. | Mortality | Poorer lung function as measured by FEV1, expressed as % predicted (composite of spirometry and symptoms or exacerbations, resulting in  8 subgroups  1A–4B | GOLD A Group A: 2.3  GOLD B Group B: 6.6 | HR  GOLD A:  1 (reference)  GOLD B:  2.58 (2.35–2.83) (Adjusted for age, gender, marital status, comorbidity, body-mass index, smoking status, and number of antihypertensive drugs, antithrombotic drugs, statins, and other lipid-lowering drugs) | All-cause mortality  1 year |
| Poorer lung function as measured by FEV1, expressed as % predicted (composite of spirometry and symptoms or exacerbations, resulting in  8 subgroups  1A–4B | GOLD A Subgroup 1A: 0.8  GOLD B Subgroup 1B: 5.0 | HR  GOLD 1A: 1 (reference)  GOLD 1B:  2.95 (1.87–4.66) | All-cause mortality  1 year |
| Poorer lung function as measured by FEV1, expressed as % predicted (composite of spirometry and symptoms or exacerbations, resulting in  8 subgroups  1A–4B | GOLD A: Subgroup 2A: 2.1  GOLD B Subgroup 2B: 5.0 | HR  GOLD 2A 1.45 (1.06–2.00)  GOLD 2B 3.02 (2.22–4.12) | All-cause mortality  1 year |
| Poorer lung function as measured by FEV1, expressed as % predicted (composite of spirometry and symptoms or exacerbations, resulting in  8 subgroups  1A–4B | GOLD A Subgroup 3A: 3.1  GOLD B Subgroup 3B: 7.4 | HR  GOLD 3A: 2.32 (1.67–3.22)  GOLD 3B: 4.49 (3.32–6.07) | All-cause mortality  1 year |
| Poorer lung function as measured by FEV1, expressed as % predicted (composite of spirometry and symptoms or exacerbations, resulting in  8 subgroups  1A–4B | GOLD A Subgroup 4A: 5.0  GOLD B Subgroup 4B: 7.6 | HR  GOLD 4A: 3.21 (2.07–4.96)  GOLD 4B 5.61 (4.14–7.61) | All-cause mortality  1 year |
| Poorer lung function as measured by FEV1, expressed as % predicted (composite of spirometry and symptoms or exacerbations, resulting in  8 subgroups  1A–4B | GOLD A: 10  GOLD B 23.8 | NR | All-cause mortality  3 years |
| Gedebjerg 2018 [26] | GOLD 2017 | GOLD A and GOLD B | 33,765 | GOLD A: 17.7%  GOLD B: 28.4%. | Mortality | Poorer lung function as measured by FEV1, expressed as % predicted (composite of spirometry and symptoms or exacerbations, resulting in  8 subgroups  1A–4B | GOLD A Subgroup 1A: 5.4  GOLD B Subgroup 1B: 17.1 | NR | All-cause mortality  3 years |
| Poorer lung function as measured by FEV1, expressed as % predicted (composite of spirometry and symptoms or exacerbations, resulting in  8 subgroups  1A–4B | GOLD A Subgroup 2A: 8.8  GOLD B Subgroup 2B: 17.2 | NR | All-cause mortality  3 years |
| Poorer lung function as measured by FEV1, expressed as % predicted (composite of spirometry and symptoms or exacerbations, resulting in  8 subgroups  1A–4B | GOLD A Subgroup 3A: 14  GOLD B Subgroup 3B: 24.9 | NR | All-cause mortality  3 years |
| Poorer lung function as measured by FEV1, expressed as % predicted | Subgroup 4A: 17.8  Subgroup 4B: 29.8 | NR | All-cause mortality  3 years |
| Poorer lung function as measured by FEV1, expressed as % predicted | GOLD A Group A: 0.  GOLD B Group B: 2.3 | HR  GOLD A 1 (reference)  GOLD B: 3.44 (2.66–4.45) | Respiratory cumulative mortality  1 year |
| Poorer lung function as measured by FEV1, expressed as % predicted | GOLD A Subgroup 1A: 0.5  GOLD B Subgroup 1B: 1.9 | HR  GOLD 1A: 1 (reference)  GOLD 1B: 2.51 (0.71–8.91) | Respiratory cumulative mortality  1 year |
| Gedebjerg 2018 [26] | GOLD 2017 | GOLD A and GOLD B | 33,765 | GOLD A: 17.7%  GOLD B: 28.4%. | Mortality | Poorer lung function as measured by FEV1, expressed as % predicted | GOLD A Subgroup 2A: 0.6  GOLD B Subgroup 2B: 0.9 | HR  GOLD 2A: 0.94 (0.39–2.27)  GOLD 2B:  1.82 (0.78–4.27) | Respiratory cumulative mortality  1 year |
| Poorer lung function as measured by FEV1, expressed as % predicted | GOLD A Subgroup 3A: 1.1  GOLD B Subgroup 3B: 2.5 | HR  GOLD 3A: 2.31 (0.96–5.57)  GOLD 3B: 4.81 (2.13–10.85) | Respiratory cumulative mortality  1 year |
| Poorer lung function as measured by FEV1, expressed as % predicted | GOLD A Subgroup 4A: 1.7  GOLD B: Subgroup 4B:3.6 | HR  GOLD 4A: 3.61 (1.21–10.74)  GOLD 4B: 8.00 (3.55–18.03) | Respiratory cumulative mortality  1 year |
| Poorer lung function as measured by FEV1, expressed as % predicted | GOLD A: 3.0  GOLD B: 9.7 | HR:  GOLD A: 1 (reference)  GOLD B: 3.44 (2.66–4.45) | Respiratory cumulative mortality  3 year |
| Poorer lung function as measured by FEV1, expressed as % predicted | GOLD A Subgroup 1A: 1.9  GOLD B Subgroup 1B: 5.2 | NR | Respiratory cumulative mortality  3 year |
| Poorer lung function as measured by FEV1, expressed as % predicted | GOLD A Subgroup 2A: 2.0  GOLD B Subgroup 2B: 5.2 | NR | Respiratory cumulative mortality  3 year |
| Gedebjerg 2018 [26] | GOLD 2017 | GOLD A and GOLD B | 33,765 | GOLD A: 17.7%  GOLD B: 28.4%. | Mortality | Poorer lung function as measured by FEV1, expressed as % predicted | GOLD A Subgroup 3A: 4.9  GOLD B Subgroup 3B: 9.3 | NR | Respiratory cumulative mortality  3 year |
| Poorer lung function as measured by FEV1, expressed as % predicted | GOLD A Subgroup 4A: 8.7  GOLD B: Subgroup 4B: 16.1 | NR | Respiratory cumulative mortality  3 year |
| Poorer lung function as measured by FEV1, expressed as % predicted | GOLD A: 0.4  GOLD B: 1.5 | HR  GOLD A: 1 (reference)  GOLD B: 2.52 (1.78–3.56) | CVD-related mortality  1 year |
| Poorer lung function as measured by FEV1, expressed as % predicted | GOLD A Subgroup 1A: 0.2  GOLD B Subgroup 1B: 0.9 | NR | CVD-related mortality  1 year |
| Poorer lung function as measured by FEV1, expressed as % predicted | GOLD A Subgroup 2A: 0.3  GOLD B Subgroup 2B: 2.0 | NR | CVD-related mortality  1 year |
| Poorer lung function as measured by FEV1, expressed as % predicted | GOLD A Subgroup 3A: 0.8  GOLD B Subgroup 3B: 1.4 | NR | CVD-related mortality  1 year |
| Gedebjerg 2018 [26] | GOLD 2017 | GOLD A and GOLD B | 33,765 | GOLD A: 17.7%  GOLD B: 28.4%. | Mortality | Poorer lung function as measured by FEV1, expressed as % predicted | GOLD A Subgroup 4A: 0.9  GOLD B Subgroup 4B: 1.2 | NR | CVD-related mortality  1 year |
| Poorer lung function as measured by FEV1, expressed as % predicted | Group A: 1.8  Group B: 3.9 | NR | CVD-related mortality  3 year |
| Poorer lung function as measured by FEV1, expressed as % predicted | GOLD A Subgroup 1A: 1.2  GOLD B Subgroup 1B: 2.2 | NR | CVD-related mortality  3 year |
| Poorer lung function as measured by FEV1, expressed as % predicted | GOLD A Subgroup 2A: 1.0  GOLD B Subgroup 2B: 4.6 | NR | CVD-related mortality  3 year |
| Poorer lung function as measured by FEV1, expressed as % predicted | GOLD A Subgroup 3A: 3.4  GOLD B Subgroup 3B: 3.7 | NR | CVD-related mortality  3 year |
| Poorer lung function as measured by FEV1, expressed as % predicted | GOLD A Subgroup 4A: 3.5  GOLDB: Subgroup 4B: 3.6 | NR | CVD-related mortality  3 year |
| Brat 2018 [4] | GOLD 2017 | GOLD B only | 725 | GOLD A: 8.3%  GOLD B: 53%. | NR | NR | GOLD B: 18.4 | GOLD B:  Significant predictors (respiratory parameters as predictors of mortality)  HR: Severe hypoxemia (PaO2  < 7.3 kPa): 3.532 (1.628–7.662),  p = 0.001  Severe hypercapnia (PaCO2 > 7 kPa): 10.185  (2.719–38.158),  p = 0.001 (PaCO2 5–7 as reference category)  Presence of desaturation: 2.001 (1.090–3.672),  p = 0.025 | All-cause mortality within GOLD-B patients, duration:  3 years |
| Chen 2015 [11] | GOLD 2013 | GOLD A and GOLD B | 354 | GOLD A: 22%  GOLD B: 23.4%. | Mortality | Worse GOLD group of COPD severity, as defined by 2013, 2017 or 2020 criteria (among those in the A/B cohort) | Group A: 14.1  Group B: 14.5 | GOLD A: 1 (Ref)  GOLD B: OR: 1.0 (0.4–2.5),  p = 0.95  Statistically significant predictors of mortality:  mMRC dyspnoea scale (p = 0.04)  risk of exacerbation according to history (p = 0.04)  BMI (p < 0.001)  Charlson Comorbidity Index  p = 0.001)  Eastern Co-operative Oncology Group (ECOG) performance status (p = 0.03) | All-cause mortality duration:  2.8 years |
| Worse GOLD group of COPD severity, as defined by 2013, 2017 or 2020 criteria (among those in the A/B cohort) | Group A: 1.3  Group B: 9.6 | GOLD A: 1 (Ref)  GOLD B:  OR: 3.5 (0.9–13.5), p = 0.07 | Respiratory mortality duration:  2.8 years |
| Faner 2018 [23] | GOLD 2017 | GOLD A and GOLD B | 2101 | GOLD A: 650 (NR) NR | Mortality | Worse GOLD group of COPD severity, as defined by 2013, 2017 or 2020 criteria (among those in the A/B cohort) | Group A: 7  Group B: 16 | GOLD A: NR  GOLD B Risk factors associated with mortality:  FEV1: p < 0.0001  mMRC: p < 0.0001  exacerbation risk:  p = 0.052 | All-cause mortality: 3 years |
| Loh 2018 [53] | GOLD 2017 | GOLD A and GOLD B | 112 | GOLD A: 31.3%  GOLD B: 29.5% | Mortality | Worse GOLD group of COPD severity, as defined by 2013, 2017 or 2020 criteria (among those in the A/B cohort) | NR | Adjusted HR for significant predictors  Age: 1.11  (1.02–1.20),  p = 0.014  BMI: 0.83  (0.70–0.98),  p = 0.036  CAT Score: 1.16 (1.00–1.34),  p = 0.049 | COPD-associated mortality, duration:  2.9 years |
| Menezes 2017 [57] | More than one GOLD criteria used | GOLD A and GOLD B | 524 | GOLD A: 71.8%a  GOLD B: 17.6%a | Mortality | Worse GOLD group of COPD severity, as defined by 2013, 2017 or 2020 criteria (among those in the A/B cohort) | Group A: 17.6 (Calculated from 66 deaths/376)  Group B: 17.4 (Calculated from 16 deaths/92) | GOLD A: Crude incidence mortality rates (per 1000 person-year): 38.04  GOLD B: Crude incidence mortality rates (per 1000 person-year): 32.46  (p-value for differences in mortality rates across GOLD 2013 A/B/C/D categories: < 0.001)  Risk factors explored for association with mortality rate: presence of symptoms and exacerbations, No clear association found. | All-cause mortality, duration:  9 years |
| Menezes 2017 [57] | More than one GOLD criteria used | GOLD A and GOLD B | 524 | GOLD A: 69.3%  GOLD 1A: 48.3%  GOLD 2A: 18.7%  GOLD 3A: 2.1%  GOLD 4A: < 1%  GOLD B: 25.6%  GOLD 1B: 11.8%  GOLD 2B: 11.1%  GOLD 3B: 2.1%  GOLD 4B: < 1% | Mortality | Worse GOLD group of COPD severity, as defined by 2013, 2017 or 2020 criteria (among those in the A/B cohort) | Group A: 19a  Group B: 19.4a | GOLD A Crude incidence mortality rates (per 1000 person-years): 41.47  GOLD B  Crude incidence mortality rates (per 1000 person-years): 37.77  p-value for across GOLD 2017 A/B/C/D categories: 0.093 | All-cause mortality, duration:  9 years |
| Poorer lung function as measured by FEV1, expressed as % predicted | Subgroup 1A: 15.8a  Subgroup 1B: 16.1a | GOLD A  Crude incidence mortality rates (per 1000 person-years): 34.62  GOLD B Crude incidence mortality rates (per 1000 person-years): 28.65  p-value for across GOLD 2017 sub-categories (1/2/3/4 A/B/C/D): < 0.001 | All-cause mortality, duration:  9 years |
| Poorer lung function as measured by FEV1, expressed as % predicted | Subgroup 2A: 22.4a  Subgroup 2B: 19a | GOLD A Crude incidence mortality rates (per 1000 person-years): 49.31  GOLD B  Crude incidence mortality rates (per 1000 person-years): 39.30  p-value for across GOLD 2017 sub-categories (1/2/3/4 A/B/C/D): < 0.001 | All-cause mortality, duration: 9 years |
| Poorer lung function as measured by FEV1, expressed as % predicted | Subgroup 3A: 54.5a  Subgroup 3B: 36.4a | GOLD A Crude incidence mortality rates (per 1000 person-years): 114.79  GOLD B Crude incidence mortality rates (per 1000 person-years): 83.18  p-value for across GOLD 2017 sub-categories (1/2/3/4 A/B/C/D): < 0.001 | All-cause mortality, duration: 9 years |
| Poorer lung function as measured by FEV1, expressed as % predicted | Subgroup 4A: 100a  Subgroup 4B: 33.3a | Crude incidence mortality rates (per 1000 person-years): 966.27  Crude incidence mortality rates (per 1000 person-years): 87.58  p-value for across GOLD 2017 sub-categories (1/2/3/4 A/B/C/D): < 0.001 | All-cause mortality, duration: 9 years |
| Plutinsky 2019 [66] | More than one GOLD criteria used | GOLD A and GOLD B | 720 | GOLD A: 4.9%  GOLD B: 20.8%. | Mortality | Worse GOLD group of COPD severity, as defined by 2013, 2017 or 2020 criteria (among those in the A/B cohort) | NR | GOLD A Survival rate:  0.886 (0.780–0.991)  GOLD B Survival rate:  0.939 (0.901–0.978)  p-value for log-rank test (across GOLD groups): 0.009 | All-cause mortality: 12 months |
|  | Worse GOLD group of COPD severity, as defined by 2013, 2017 or 2020 criteria (among those in the A/B cohort) | NR | GOLD A Survival rate: 0.853 (0.733–0.972)  GOLD B Survival rate: 0.873 (0.815–0.930)  p-value for log-rank test (across GOLD groups): 0.009 | All-cause mortality: 24 months |
|  | Worse GOLD group of COPD severity, as defined by 2013, 2017 or 2020 criteria (among those in the A/B cohort) | NR | GOLD A Survival rate:  0.853 (0.733–0.972)  GOLD B Survival rate:  0.804 (0.729–0.879)  p-value for log-rank test (across GOLD groups): 0.009 | All-cause mortality: 36 months |
|  | Worse GOLD group of COPD severity, as defined by 2013, 2017 or 2020 criteria (among those in the A/B cohort) | Group A: 14.3  Group B: 18.7 | GOLD A Survival rate:  0.853 (0.733–0.972)  GOLD B Survival rate:  0.686 (0.560–0.813)  p-value for log-rank test (across GOLD groups): 0.009 | All-cause mortality: 48 months |
| Plutinsky 2019 [66] | More than one GOLD criteria used | GOLD A and GOLD B | 720 | GOLD A: 8.5%  GOLD B: 52.8%. | Mortality | Worse GOLD group of COPD severity, as defined by 2013, 2017 or 2020 criteria (among those in the A/B cohort) | NR | GOLD A Survival rate:  0.917 (0.847–0.987)  GOLD B Survival rate:  0.915 (0.887–0.943)  p-value for log-rank test (across GOLD groups): 0.050 | All-cause mortality: 12 months |
| Worse GOLD group of COPD severity, as defined by 2013, 2017 or 2020 criteria (among those in the A/B cohort) | NR | GOLD A Survival rate:  0.863 (0.774–0.951)  GOLD B Survival rate:  0.809 (0.767–0.851)  p-value for log-rank test (across GOLD groups): 0.050 | All-cause mortality: 24 months |
| Worse GOLD group of COPD severity, as defined by 2013, 2017 or 2020 criteria (among those in the A/B cohort) | NR | GOLD A Survival rate:  0.837 (0.737–0.936)  GOLD B Survival rate:  0.729 (0.678–0.780)  p-value for log-rank test (across GOLD groups): 0.050 | All-cause mortality: 36 months |
| Worse GOLD group of COPD severity, as defined by 2013, 2017 or 2020 criteria (among those in the A/B cohort) | Group A: 14.8  Group B: 25.5 | GOLD A  Survival rate: 0.837 (0.737–0.936)  GOLD B  Survival rate: 0.639 (0.571–0.707)  p-value for log-rank test (across GOLD groups): 0.050 | All-cause mortality: 48 months |
| Criner 2019 [15] | GOLD 2017 | GOLD A and GOLD B | 4469 | GOLD A  mMRC: 37%  Based on SGRQ: 32.1%  GOLD B  mMRC: 36.3%.  SGRQ: 41.2%. | Mortality | Worse GOLD group of COPD severity, as defined by 2013, 2017 or 2020 criteria (among those in the A/B cohort) | GOLD A  Based on mMRC: 8.2  Based on SGRQ: 7.6  GOLD B  Based on mMRC: 23.8  Based on SGRQ: 22.5 | HR  GOLD A: 1 (Ref)  HR: GOLD A vs B based on mMRC: 3.4 (2.8–4.1)  GOLD A vs B based on SGRQ:  3.4 (2.7–4.1) [adjusted for demographics, cardiovascular comorbidities, cardiovascular risk factors, musculoskeletal disease, and asthma] | All-cause mortality, duration: 6.8 years |
| Lee 2019 [49] | GOLD 2017 | GOLD A and GOLD B | 149 | GOLD A: 23.5%  GOLD B: 51.7% | Mortality | Worse GOLD group of COPD severity, as defined by 2013, 2017 or 2020 criteria (among those in the A/B cohort) | GOLD A: 11.4  GOLD B: 19.5 | P-value for comparison of mortality rate among the GOLD groups A to D: 0.001  Log-rank p-value for survival among the GOLD groups  A to D: < 0.001 | Mortality rate, duration: 5.1 years |
| Garcia Castillo 2020 [24] | More than one GOLD criteria used | GOLD A and GOLD B | 8823 | GOLD A: 29.9%  GOLD B: 16.4% (GOLD 2015) | Mortality | Worse GOLD group of COPD severity, as defined by 2013, 2017 or 2020 criteria (among those in the A/B cohort) | GOLD A: 5.8  GOLD B: 13.8  NR | p-value for comparison of mortality rate among the GOLD groups A to D: 0.001  Log rank p-value for survival among the GOLD groups A to D: < 0.001  2015 GOLD classification was higher in GOLD B, followed by  GOLD A (table 2 and figure 2a) | All-cause mortality: 5 years |
| Garcia Castillo 2020 [24] | More than one GOLD criteria used | GOLD A and GOLD B | 8823 | GOLD A: 37.7%  GOLD B: 38.6% (GOLD 2019) | Mortality | Worse GOLD group of COPD severity, as defined by 2013, 2017 or 2020 criteria (among those in the A/B cohort) | GOLD A: 7.5  GOLD B: 23.2 | NR and HR/OR/RR not reported  p-value for comparison of cumulative survival among the GOLD groups A to D:  < 0.01 | All-cause mortality: 5 years |
|
| Poorer lung function as measured by FEV1, expressed as % predicted | Subgroup 1A: 3.4  Subgroup 1B: 9.8 | p-value for comparison of cumulative survival among the GOLD A–D subgroups within GOLD Stage 1 patients: < 0.01 | All-cause mortality: 5 years |
|
| Poorer lung function as measured by FEV1, expressed as % predicted | Subgroup 2A: 7.0  Subgroup 1B: 14.9 | p-value for comparison of cumulative survival among the GOLD A–D subgroups within GOLD Stage 1 patients: < 0.01 | All-cause mortality: 5 years |
| Poorer lung function as measured by FEV1, expressed as % predicted | Subgroup 1A: 13.0  Subgroup 1B: 23.7 | p-value for comparison of cumulative survival among the GOLD A–D subgroups within GOLD Stage 1 patients: < 0.01 | All-cause mortality: 5 years |
| Poorer lung function as measured by FEV1, expressed as % predicted | Subgroup 3A: 16.7  Subgroup 3B: 39.1 | p-value for comparison of cumulative survival among the GOLD A–D subgroups within GOLD Stage 3 patients: < 0.01 | All-cause mortality: 5 years |
|
| Lopez 2018 [54] | More than one GOLD criteria used | GOLD A and GOLD B | 819 | GOLD A: 42.86%  GOLD B: 14.04%. | Mortality | Worse GOLD group of COPD severity, as defined by 2013, 2017 or 2020 criteria (among those in the A/B cohort) | GOLD A: 18.9a  GOLD B: 32.5a | p-value for comparison of survival rate among the GOLD groups  A to D: < 0.001  HR/OR/RR not reported  p-value for comparison of survival rate among the GOLD groups  A to D: < 0.001 | All-cause mortality: 5 years |
|
| Lopez 2018 [54] | More than one GOLD criteria used | GOLD A and GOLD B | 819 | GOLD A: 53.36%  GOLD B: 26.74%. | Mortality | Poorer lung function as measured by FEV1, expressed as % predicted | Subgroup 1A: 11.3  Subgroup 1B: 25 | p-value for comparison of survival rate among the GOLD A 1–4 subgroups: < 0.001  HR/OR/RR not reported  p-value for comparison of survival rate among the GOLD B 1–4 subgroups: 0.095 | All-cause mortality: 5 years |
|
| Poorer lung function as measured by FEV1, expressed as % predicted | Subgroup 3A: 31  Subgroup 3B: 43.2 | p-value for comparison of survival rate among the GOLD A 1–4 subgroups: < 0.001  HR/OR/RR not reported  p-value for comparison of survival rate among the GOLD B 1–4 subgroups: 0.095 | All-cause mortality [Median follow-up: 60 months] |
| Respiratory cause mortality [Median follow-up: 60 months] |
| Han 2018 [33] | More than one GOLD criteria used | GOLD A and GOLD B | 553 | GOLD A: 28.4%  GOLD B: 33.6%. | Mortality | Worse GOLD group of COPD severity, as defined by 2013, 2017 or 2020 criteria (among those in the A/B cohort) | GOLD A: 26.1  GOLD B: 46.8 | OR:  GOLD A: 1 (Ref)  GOLD B:  2.49 (1.57–3.93)  p-value for comparison of all-cause mortality among the GOLD groups A to D:  < 0.001 | Cardiovascular cause mortality [Median:  62 months (IQR 59–65.2) |
| Cancer cause mortality [Median:  62 months (IQR 59–65.2)] |
| Worse GOLD group of COPD severity, as defined by 2013, 2017 or 2020 criteria (among those in the A/B cohort) | GOLD A: 6.4  GOLD B: 3.8 | p-value for comparison of cardiovascular cause mortality among the GOLD groups A to D: 0.052 | All-cause mortality [Median:  62 months (IQR 59–65.2)] |
| All-cause mortality [Median:  62 months (IQR 59–65.2)] |
| Poorer lung function as measured by FEV1, expressed as % predicted | GOLD 1A: 24.3  GOLD 1B: 27.7 | p-value for comparison of all-cause mortality among the GOLD groups 1A–4A: 0.41  HR/OR/RR not reported  p-value for comparison of all-cause mortality among the GOLD groups 1B–4B: 0.01 | All-cause mortality [Median:  62 months (IQR 59–65.2)] |
| All-cause mortality [Median:  62 months (IQR 59–65.2)] |
| Poorer lung function as measured by FEV1, expressed as % predicted | GOLD 3A: 41.7  GOLD 3B: 53.3 | p-value for comparison of all-cause mortality among the GOLD groups 1A–4A: 0.41  HR/OR/RR not reported  p-value for comparison of all-cause mortality among the GOLD groups 1B–4B: 0.01 | Respiratory cause mortality [Median:  62 months (IQR 59–65.2)] |
| Respiratory cause mortality [Median:  62 months (IQR 59–65.2)] |
| Han 2018 [33] | More than one GOLD criteria used | GOLD A and GOLD B | 553 | GOLD A: 28.4%  GOLD B: 33.6%. | Mortality | Poorer lung function as measured by FEV1, expressed as % predicted | GOLD 1A: 0  GOLD 1B: 12.8 | p-value for comparison of respiratory cause mortality among the GOLD groups  1A–4A: 0.002  HR/OR/RR not reported  p-value for comparison of respiratory cause mortality among the GOLD groups  1B–4B: 0.01 | Respiratory cause mortality [Median:  62 months (IQR 59–65.2)] |
| Respiratory cause mortality [Median:  62 months (IQR 59–65.2)] |
| Poorer lung function as measured by FEV1, expressed as % predicted | GOLD 3A: 16.7  GOLD 3B: 33.3 | p-value for comparison of respiratory cause mortality among the GOLD groups  1A–4A: 0.002  HR/OR/RR not reported  p-value for comparison of respiratory cause mortality among the GOLD groups  1B–4B: 0.01 | Cardiovascular cause mortality [Median:  62 months (IQR 59–65.2)] |
| Cardiovascular cause mortality [Median:  62 months (IQR 59–65.2)] |
| Poorer lung function as measured by FEV1, expressed as % predicted | GOLD 1A: 8.1  GOLD 1B: 2.1 | p-value for comparison of cardiovascular cause mortality among the GOLD groups 1A–4A: 0.26  HR/OR/RR Not reported  p-value for comparison of cardiovascular cause mortality among the GOLD groups 1B–4B: 0.13 | Cardiovascular cause mortality [Median:  62 months (IQR 59–65.2)] |
| Cardiovascular cause mortality [Median:  62 months (IQR 59–65.2)] |
| Poorer lung function as measured by FEV1, expressed as % predicted | GOLD 3A: 16.7  GOLD 3B: 0 | p-value for comparison of cardiovascular cause mortality among the GOLD groups 1A–4A: 0.26  HR/OR/RR not reported  p-value for comparison of cardiovascular cause mortality among the GOLD groups 1B–4B: 0.13 | Cancer cause mortality [Median:  62 months (IQR 59–65.2)] |
| Cancer cause mortality [Median:  62 months (IQR 59–65.2)] |
| Poorer lung function as measured by FEV1, expressed as % predicted | GOLD 1A: 7.2  GOLD 1B: 8.5 | p-value for comparison of cancer cause mortality among the GOLD groups  1A–4A: 0.58  HR/OR/RR not reported  p-value for comparison of cancer cause mortality among the GOLD groups  1B–4B: 0.49 | Cancer cause mortality [Median:  62 months (IQR 59–65.2)] |
| Cancer cause mortality [Median:  62 months (IQR 59–65.2)] |
| Poorer lung function as measured by FEV1, expressed as % predicted | GOLD 3A: 0  GOLD 3B: 13.3 | p-value for comparison of cancer cause mortality among the GOLD groups  1A–4A: 0.58  HR/OR/RR not reported  p-value for comparison of cancer cause mortality among the GOLD groups  1B–4B: 0.49 | NR |
| All-cause mortality [Median:  62 months (IQR 59–65.2)] |
| Han 2018 [33] | More than one GOLD criteria used | GOLD A and GOLD B | 553 | GOLD A: 28.4%  GOLD B: 33.6%. | Risk factors of mortality for overall popular-tion (GOLD A/B/C/D) | NR | NR | NR | Respiratory cause mortality [Median:  62 months (IQR 59–65.2)] |
| All-cause mortality (Median follow-up: 14.6 years) |
| Han 2018 [33] | More than one GOLD criteria used | GOLD A and GOLD B | 553 | GOLD A: 25.9%  GOLD B: 23.1%. | Mortality | Worse GOLD group of COPD severity, as defined by 2013, 2017 or 2020 criteria (among those in the A/B cohort) | NR | OR  GOLD A: 1 (Ref)  GOLD B: 8.43 (2.85–24.98),  p < 0.001 | All-cause mortality  Follow-up for overall population (GOLD A/B/C/D): 32.5 months (IQR 19.5–42.8) [Calculated in years: 2.1 years (IQR 1.6–3.6 years)]  Follow-up for BS-COPD: 31.5 months (IQR 20.2–44.7) [Calculated in years: 2.6 years (IQR 1.7–3.7)]  Follow-up for T-COPD: 28.7 months (IQR 19.1–42.6) [Calculated in years: 2.4 years (IQR 1.6–3.5)] |
| All-cause mortality:  12 months |
| Golpe 2015 [27] | GOLD 2013 | GOLD A and GOLD B | 612 | GOLD A: 25.9%  Biomass group:  25.3%  Tobacco group: 26.2% 17.0%  GOLD B:  Biomass group: 30.3%  Tobacco group: 12.9% | Mortality | NR | Overall population (GOLD A/B/C/D)  Total deaths: 70 (11.4 %)  COPD:  25 (4.1 %)  Cardiovascular disease:  10 (1.6 %)  Cerebrovas-cular disease:  2 (0.3 %)  Lung cancer: 11 (1.8 %)  Solid neoplasm other than lung cancer:  8 (1.3 %)  Hematologic neoplasm:  1 (0.1 %)  Other:  5 (0.8 %)  Unknown:  8 (1.3 %)  Overall population (GOLD A/B/C/D):  Total deaths: 70 (11.4 %)  COPD:  25 (4.1 %)  Cardiovascular disease:  10 (1.6 %)  Cerebrovas-cular disease:  2 (0.3 %)  Lung cancer: 11 (1.8 %)  Solid neoplasm other than lung cancer:  8 (1.3 %)  Hematologic neoplasm:  1 (0.1 %)  Other:  5 (0.8 %)  Unknown: 8 (1.3 %) | Overall population (GOLD A/B/C/D), HR for significant predictors in multivariate analysis  Age: 1.03  (1.00–1.06),  p-value: 0.038  BODEx: 1.41  (1.26–1.58),  p-value: < 0.001  Charlson Comorbidity Index: 1.19 (1.01–1.41),  p-value: 0.039  COTE index:  1.17 (1.02–1.33),  p-value: 0.022 | All-cause mortality:  12 months |
| All-cause mortality:  96 months |
| Kobayashi 2018 [45] | More than one GOLD criteria used | GOLD A and GOLD B | 401 | GOLD A: 59.9%  GOLD B: 30.4%. | Mortality | Worse GOLD group of COPD severity, as defined by 2013, 2017 or 2020 criteria (among those in the A/B cohort) | GOLD A: 1.3%  GOLD B: 4.9% | OR  GOLD A: 1 (Ref)  GOLD B:  3.85 (0.98–15.1),  p-value for comparison of GOLD A/B combined against GOLD C/D: 0.987 | All-cause mortality:  96 months |
| All-cause mortality: 96 months |
| Le 2019 [48] | GOLD 2017 | GOLD A and GOLD B | 921 | GOLD A: 24.7%  GOLD B: 52.2%. | Mortality | Worse GOLD group of COPD severity, as defined by 2013, 2017 or 2020 criteria (among those in the A/B cohort) | Group A: 15.1%a  Group B: 33.4%a | Adjusted OR  Group A: 1 (Ref)  Group B:  2.1 (1.3–3.4) [adjusted for gender, age, smoking, body mass index, comorbidities (diabetes, angina/heart attack, high blood pressure)] | All-cause mortality:  96 months |
| Respiratory mortality:  91 months |
| Poorer lung function as measured by FEV1, expressed as % predicted | Subgroup 3A: 19.2%a  Subgroup 3B: 39.3%a | Adjusted OR  Subgroup 3A:  0.8 (0.3–2.6) [adjusted for gender, age, smoking, body mass index, comorbidities (diabetes, angina/heart attack, high blood pressure)]  Subgroup 3B:  2.5 (1.4–4.4) [adjusted for gender, age, smoking, body mass index, comorbidities (diabetes, angina/heart attack, high blood pressure)] | Respiratory mortality: 91 months |
| Respiratory mortality: 91 months |
| Le 2019 [48] | GOLD 2017 | GOLD A and GOLD B | 921 | GOLD A: 24.7%  GOLD B: 52.2%. | Mortality | Worse GOLD group of COPD severity, as defined by 2013, 2017 or 2020 criteria (among those in the A/B cohort) | Group A: 2.7%a  Group B:  13%a | Adjusted OR  Group A: 1 (Ref)  Group B:  4.3 (1.8–10.3) adjusted for gender, age, smoking, body mass index, comorbidities (diabetes, angina/heart attack, high blood pressure)] | Respiratory mortality: 91 months |
| All-cause mortality:  12 months |
| Le 2019 [48] | GOLD 2017 | GOLD A and GOLD B | 921 | GOLD A: 24.7%  GOLD B: 52.2%. | Mortality | Poorer lung function as measured by FEV1, expressed as % predicted | Subgroup 3A: 0%a  Subgroup 3B: 16%a | NR (OR not reported for groups with three or fewer outcomes due to uncertain estimates)  Adjusted OR,  Subgroup 3B:  5.4 (1.8–16.3) [adjusted for gender, age, smoking, body mass index, comorbidities (diabetes, angina/heart attack, high blood pressure)] | All-cause mortality:  12 months |
| All-cause mortality:  12 months |

BMI = body mass index, CAT = COPD Assessment Test, GOLD = Global Initiative for Chronic Obstructive Lung Disease, FEV = forced expiratory volume, HR = hazard ratio, IQR = interquartile range, mMRC = modified Medical Research Council, OR = odds ratio, RR = relative risk, SGRQ = St. George’s Respiratory Questionnaire.

aCalculated.

**Supplementary Table S18** Symptom outcomes

| **Publication** | **GOLD classification** | **Study Population** | **Sample size, n** | **GOLD A and GOLD B, %** | **Study design** | **Exposure for Symptoms**  **GOLD A/B** | **Specific clinical outcome** | **Tool used to measure symptoms** | **Data reported for Symptoms**  **GOLD A/B** | **Symptoms scale HR/OR/RR (95% CI) GOLD A/B** |
| --- | --- | --- | --- | --- | --- | --- | --- | --- | --- | --- |
| Cho 2019 [13] | GOLD 2017 | GOLD A only | 340 | GOLD A: 100%  GOLD B: 0% | Prospective cohort study | Worse GOLD group of COPD severity, as defined by 2013, 2017 or 2020 criteria (among those in the A/B cohort) | Symptom scale | mMRC | NR | GOLD A, Mean change from baseline at 12 months:  No regular treatment:  0.4 (0.3–0.6), p-value: NR  Regular treatment:  0.1 (–0.1–0.2), p: NR  Mean between-group difference:  –0.4 (–0.6 to  –0.1),  p = 0.004  GOLD B: NA (Study only included GOLD A patients) |
| Worse GOLD group of COPD severity, as defined by 2013, 2017 or 2020 criteria (among those in the A/B cohort) | Symptom scale | CAT | NR | GOLD A: There were no significant between-group differences in the CAT score during the follow-up period of  48 months (Mean values not reported) and NA (Study included only GOLD A patients) |
| Choi 2018 [14] | GOLD 2017 | GOLD B only | 2010 | GOLD A: 21.5%  GOLD B: 62.7% | Prospective cohort study | Worse GOLD group of COPD severity, as defined by 2013, 2017 or 2020 criteria (among those in the A/B cohort) | Symptom scores for GOLD B patients who remained in GOLD B category after 1 year | mMRC | GOLD B:  1.6 (0.7) | GOLD A: NR  GOLD B:  mMRC (Exp  B: 1.617, 95% CI  1.159–2.259,  p = 0.005) was significantly associated with progression from GOLD B to GOLD D at 1 year after adjusting for sex, BMI, the presence of chronic bronchitis, the SGRQ-A, SGRQ total and CAT scores, a history of gastroesophageal reflux disease, and exacerbation frequency at baseline |
| CAT | GOLD B: 17.9 (6.4) | NR |
| Crisafulli 2017 [16] | GOLD 2013 | GOLD A and GOLD B | 202 | Overall GOLD A: 70 (35%)  With SAD: 34 (23.0%)  Without SAD: 36 (67.3%)a  Overall GOLD B: 43 (21%)  With SAD: 38 (25.4%)  Without SAD: 5 (9.7%)a | Prospective cohort study | NR | NR | CAT | NR | Multivariate analysis predicting the probability to have a CAT score ≥ 10 showed that the presence of SAD (OR 11.96 95% CI 4.53–31.58  p < 0.001) and the use of domiciliary medication ICS + LABA + LAMA  (OR 5.31 95% CI 1.88–15.02  p = 0.002) had an independent predictive role |
| Faner 2018 [23] | GOLD 2017 | GOLD A and GOLD B | 2101 | NR | Prospective cohort study | Worse GOLD group of COPD severity, as defined by 2013, 2017 or 2020 criteria (among those in the A/B cohort) | Proportion of patients with change in mMRC | mMRC | Worsening of mMRC  GOLD A: 22%  GOLD B: 16% | NR |
| Sun 2017 [74] | GOLD 2017 | GOLD A and GOLD B | 1532 | GOLD A: 36.4%  GOLD B: 26.4% | Cross-sectional study | Worse GOLD group of COPD severity, as defined by 2013, 2017 or 2020 criteria (among those in the A/B cohort) | mMRC dyspnoea score | mMRC | GOLD A:  1.0 (1.0)  GOLD B:  2.0 (1.0) | NR |
| Jung 2015 [41] | GOLD 2013 | GOLD A and GOLD B | 118 | GOLD A: 22.9%  GOLD B: 38.1% | Cross-sectional study | NR | NR | mMRC | NR | OR for significant predictors: FEV1 (%): 0.01  (–0.02–0.01), p < 0.001  RSI: 0.03 (0.003–0.06), p = 0.028 |
| Kupryś-Lipińska 2014 [46] | GOLD 2013 | GOLD A and GOLD B | 2967 (Number of question-naires analysed) | GOLD A: 52.67%  GOLD B: 10.72% | Cross-sectional study | NR | NR | mMRC | NR | Men compared to women  (p < 0.00001), and past smokers compared to current smokers  (p < 0.00001) had more severe dyspnoea |
| Casanova 2014 [7] | GOLD 2013 | GOLD A and GOLD B | 828 | GOLD A: 17.8%  GOLD B: 37.9% | Prospective cohort study | Worse GOLD group of COPD severity, as defined by 2013, 2017 or 2020 criteria (among those in the A/B cohort) | Predictor of CAT score | CAT | Longitudinal 1 changes in groups A to D were associated with 1 change in the CAT score | GOLD A: Longitudinal 1 changes in groups A to D were associated with 1 change in the CAT score  GOLD B: NR |
| Von Siemens 2019 [79] | GOLD 2017 | GOLD A and GOLD B | 2255 | GOLD A: 38.6%a  GOLD B: 25.1%a | Cross-sectional study | Worse GOLD group of COPD severity, as defined by 2013, 2017 or 2020 criteria (among those in the A/B cohort) | Predictors of CAT score | CAT | GOLD A: 13.9 (6.2)  GOLD B: 20.3 (6.2) | Coefficient for association with PHQ-9 sum score  Non-standardised coefficient: 0.329  Standardised coefficient: 0.509  (0.301, 0.356), p < 0.001 |
| Agarwal 2018 [1] | GOLD 2017 | GOLD A and GOLD B | 150 | GOLD A: 4.7%a and GOLD B: 40.7%a | Cross-sectional study | Worse GOLD group of COPD severity, as defined by 2013, 2017 or 2020 criteria (among those in the A/B cohort) | Predictor of mMRC score in GOLD B patients | mMRC | NR | GOLD A: NR and GOLD B: mMRC Grade 4 was associated with prevalence of depression  Higher prevalence of depression amongst patients with mMRC grade 4 dyspnoea  (p = 0.015). |
| Yazar 2020 [80] | GOLD 2017 | GOLD A and GOLD B | 251 | GOLD A: 31.9%  GOLD B: 25.1% | Cross-sectional study | Worse GOLD group of COPD severity, as defined by 2013, 2017 or 2020 criteria (among those in the A/B cohort) | CAT score | CAT | GOLD A:  5.2 (2.5)  GOLD B: 13.4 (5.4) | NR |
| mMRC dyspnoea score | mMRC | GOLD A:  0.6 (0.6)  GOLD B:  1.9 (1) | NR |
| Lawrence 2017 [47] | GOLD 2013 | GOLD A and GOLD B | 370 | GOLD A: 9.2%  GOLD B: 28.9% | Prospective cohort study | Worse GOLD group of COPD severity, as defined by 2013, 2017 or 2020 criteria (among those in the A/B cohort) | CAT symptom score | CAT | Median (Range)  GOLD A:  6.0 (2.0–9.0)  GOLD B: 16.0  (4.0–39.0) | HR/OR/RR (95% CI) not reported  p-value between group A and B:  < 0.0001 |
| CAT symptom score | CAT | Median (Range) Patients who remained in GOLD B 15.5  (9.0–35.0) | p-value between group B and D: 0.018 |
| CAT symptom score | CAT | Patients who remained in GOLD B, Median (Range): 14.0  (4.0–28.0) | p-value between group B and D: 0.006 |
| Kim 2015 [44] | GOLD 2013 | GOLD A and GOLD B | 175 | GOLD A: 9.2%  GOLD B: 28.9% | Prospective cohort study | Worse GOLD group of COPD severity, as defined by 2013, 2017 or 2020 criteria (among those in the A/B cohort) | Annual rate of decline in postbronchodilator FEV1 (mL/yr) | FEV1 | NR | GOLD A: Adjusted rate: –34.4 (7.9)  GOLD B: Adjusted rate: –26.2 (9.4)  p-value among different GOLD group: 0.467  [both rates adjusted by age, sex, height, weight, smoking status, and the medication possession ratio of respiratory medications (inhaled corticosteroid/ long acting b‑agonist and long-acting muscarinic antagonist)] |
| Annual rate of percentage decline in postbronchodilator FEV1 | FEV1 | NR | GOLD A Adjusted rate: –0.34 (0.26)  GOLD B Adjusted rate: –0.12 (0.31)  [Both rates Adjusted by age, sex, height, weight, smoking status, and the medication possession ratio of respiratory medications (inhaled corticosteroid/ long acting b‑agonist and long-acting muscarinic antagonist], p‑value among different GOLD group: 0.941 |
| Oishi 2018 [64] | GOLD 2017 | GOLD A only | 1168 | GOLD 2017  GOLD A: 49%  mMRC grade 0 and no exacer-bations: 15.3%  mMRC grade 0 and a history of one exacer-bation: 3.0%  mMRC grade 1 and no exacer-bation history: 23.4%  mMRC grade 1 and a history of one exacer-bation: 7%  GOLD B: 38.6% | Cross-sectional study | Worse GOLD group of COPD severity, as defined by 2013, 2017 or 2020 criteria (among those in the A/B cohort) | Predictors of mMRC | mMRC | GOLD A: 0.62 (0.48)  mMRC grade 0 and no exacer-bations:  179 (15.3%)  mMRC grade 0 and a history of one exacer-bation:  35 (3.0%)  mMRC grade 1 and no exacerbation history:  273 (23.4%)  mMRC grade 1 and a history of one exacer-bation:  82 (7%)  (Study reported data for combined group B–D) | The difference in exacer-bations between mMRC grades 0 and 1 in group A patients was not statistically significant  (p = 0.054) but demonstrated a trend toward more exacer-bations in the mMRC grade 1 group. There were significant differences in FVC, FEV1, FEV1/FVC, and % FEV1 between mMRC grades 0 and 1. Significant differences in % FEV1 were found between the categories of mMRC grade 0 in group A and mMRC grade 1 in group A, group A, and groups B–D. Regarding the proportion of patients with exacerbations, a significant difference between group A and groups B–D was found, and a difference between mMRC grades 0 and 1 in group A was found |
| Moya-Álvarez 2020 [60] | GOLD 2017 | GOLD A and GOLD B | 169 | Based on CAT: 36.1%  Based on mMRC: 63.9%  GOLD B: Based on CAT: 38.5%  Based on mMRC: 10.7% | Cross-sectional study | Worse GOLD group of COPD severity, as defined by 2013, 2017 or 2020 criteria (among those in the A/B cohort) | Agreement between CAT and mMRC for classification of COPD patients into GOLD groups | CAT and mMRC | Using CAT ≥ 10: 61 (36.1%)  Gols B:  CAT ≥ 10: 65 (38.5%)  Using mMRC cut-offs  mMRC ≥ 1:  GOLD A: 34  GOLD B: 92  mMRC ≥ 2:  GOLD A: 108  GOLD B: 18  mMRC ≥ 3: GOLD A: 120  GOLD B: 6  mMRC ≥ 4:  GOLD A: 124  GOLD B: 2  (Categories not mutually exclusive, hence % not calculated) | Kappa coefficient of different mMRC cut-offs with CAT ≥ 10 as reference  mMRC ≥ 1: 0.623  mMRC ≥ 2: 0.492  mMRC ≥ 3: 0.321  mMRC ≥ 4: 0.242 (95% CI not reported)  The correlation between the mMRC dyspnoea scale and the CAT questionnaire score was statistically significant  (p < 0.001), with a value of the Spearman correlation coefficient of 0.661 (moderate-high correlation) |
| Ierodiakonou 2020 [38] | GOLD 2017 | GOLD A and GOLD B | 257 | GOLD A  Based on CAT: 5.4%  Based on mMRC: 27.5%  GOLD B  Based on CAT: 56.4%  Based on mMRC: 34.3% | Cross-sectional study | Worse GOLD group of COPD severity, as defined by 2013, 2017 or 2020 criteria (among those in the A/B cohort) | Predictor of CAT score | CAT | GOLD B CAT ≥10: 224 (91.1%) | Adjusted OR for association of poor adherence to inhalers with probability of having CAT  ≥ 10: 4.86 (1.61–14.69)  p-value: 0.005 [Adjusted for gender, age and smoking status] |
| Predictor of mMRC score | mMRC | GOLD B mMRC ≥ 2: 154 (60.6%) | Adjusted OR for association of poor adherence to inhalers with probability of having mMRC ≥ 2: 2.93  (1.51–5.71)  p = 0.002 [Adjusted for gender, age and smoking status] |
| Hussey 2020 [37] | GOLD 2017 | GOLD A and GOLD B | Real-world population: 569  RCT population: 72  Real-world population meeting RCT eligibility: 129 | NR | Prospective cohort study | Higher symptom burden as measured by a symptom score (MRC/mMRC Dyspnoea Scale/CAT/SGRQ) | Reduction in CAT score by  ≥ 3 points, stratified by baseline CAT groups | CAT | NR | Adjusted OR for association with reduction in CAT score  Overall population (GOLD A/B/C/D)  Baseline CAT ≥ 20 (poor baseline QoL) vs Baseline CAT < 10 (good QoL): 18.5 (CI 7.49–26.38) |
| Worse GOLD group of COPD severity, as defined by 2013, 2017 or 2020 criteria (among those in the A/B cohort) | Reduction in CAT score by  ≥ 3 points. stratified by GOLD groups | NR | NR | OR for association with reduction in CAT score  GOLD A:  1 (Ref)  GOLD B: 6.6 (3.47–12.50) |
| NR | Predictors of reduction in CAT score by  ≥ 3 points, for overall population (GOLD A/B/C/D) | NR | Overall Population (GOLD A/B/C/D)  Proportion of patients with CAT score reduction of ≥ 3 points  Real-world population: 'n' not reported (43%)  RCT population: 64 (89%)  Real-world population meeting RCT eligibility: 'n' not reported (49%) | Overall population (GOLD A/B/C/D), OR for significant predictors of reduction in CAT score by ≥ 3 points  mMRC dyspnoea symptoms: 0.7 (0.42–0.99)  Smoking status: 1.5 (1.02–2.27)  [OR for Baseline CAT score and GOLD A–D groups extracted in rows above] and overall population (GOLD A/B/C/D)  OR for significant predictors of reduction in CAT score by ≥ 3 points  mMRC dyspnoea symptoms: 0.7 (0.42–0.99)  Smoking status: 1.5 (1.02–2.27) [OR for  Baseline CAT score and GOLD A–D groups extracted in rows above] |
| Kobayashi 2018 [45] | More than one GOLD criteria used | GOLD A and GOLD B | 401 | GOLD A: 59.9%  GOLD B: 30.4% | Prospective cohort study | Worse GOLD group of COPD severity, as defined by 2013, 2017 or 2020 criteria (among those in the A/B cohort) | % FEV1 | FEV1 | Low-risk group (GOLD A/B): 64.2 (20.7) | NR |
| mMRC dyspnoea score | mMRC | Low-risk group (GOLD A/B): 1.0 (1.0) | NR |
| CAT symptom score | CAT | Low-risk group (GOLD A/B): 6.3 (5.7) | NR |
| % FEV1 | FEV1 | Less symptomatic patients (GOLD A/C): 68.1 (17.7)  More symptomatic patients (GOLD B/D): 54.2 (23.2) | NR |
| mMRC dyspnoea score | mMRC | Less symptomatic patients (GOLD A/C): 0.5 (0.5)  More symptomatic patients (GOLD B/D): 2 (0.9) | NR |
| CAT symptom score | CAT | Less symptomatic patients (GOLD A/C): 3.7 (2.6)  More symptomatic patients (GOLD B/D): 11.5 (6.5) | NR |
| Song 2018 [72] | More than one GOLD criteria used | GOLD A and GOLD B | 1880 | GOLD A: 17.8%  GOLD B: 37.5% | Prospective cohort study | Worse GOLD group of COPD severity, as defined by 2013, 2017 or 2020 criteria (among those in the A/B cohort) | CAT symptom score | CAT | Mean change from baseline  GOLD A:  1.7 (4.7)  GOLD B: –1.6 (6.8) | p-value for change from baseline compared across GOLD A–D: < 0.001 |
| GOLD A: 22.2%  GOLD B: 61.2% | Worse GOLD group of COPD severity, as defined by 2013, 2017 or 2020 criteria (among those in the A/B cohort) | CAT symptom score | CAT | Mean change from baseline  GOLD A:  2.3 (5.4)  GOLD B:  –1.2 (7.0) | p-value for change from baseline compared across GOLD A–D: < 0.001 |
| Ding 2018 [18] | GOLD 2017 | GOLD A and GOLD B | 1775 | GOLD A: 14.8%  GOLD B: 46.6% | Cross-sectional study | NR | Predictors of CAT score | CAT | NR | Overall population (GOLD A/B/C/D)  Adjusted coefficient for association with FPI-SF total score: Regression coefficient:  –0.0403 (r2 value: 0.4335), p-value: 0.00  [Adjusted for patient age, sex, BMI, employment status, currently prescribed treatment, smoking status, and Charlson Comorbidity Index] |
| Predictors of FEV1 % predicted | FEV1 | NR | Overall population (GOLD A/B/C/D)  Adjusted coefficient for association with FPI-SF total score:  Regression coefficient: 0.0104 (r2 value: 0.3299),  p-value: 0.00 [Adjusted for patient age, sex, BMI, employment status, currently prescribed treatment, smoking status, and Charlson Comorbidity Index] |
| Mehta 2014 [56] | GOLD 2013 | GOLD A and GOLD B | 59 | GOLD A: 16.9%a  GOLD B: 18.6%a | Cross-sectional study | Worse GOLD group of COPD severity, as defined by 2013, 2017 or 2020 criteria (among those in the A/B cohort) | CAT symptom score | CAT | GOLD A:  5.6 (2.4)  GOLD B: 18.9 (6.8) | HR/OR/RR (95% CI) not reported  Overall population (GOLD A/B/C/D): Patients with depression and anxiety disorders were likely to have higher CAT score  (p = 0.02 and p = 0.004, respectively) |
| mMRC symptom score | mMRC | GOLD A: 0 (Range 0–2)  GOLD B: 3 (Range 1–4) | Overall population (GOLD A/B/C/D)  Patients with anxiety disorders were likely to have higher mMRC (p = 0.01) |

BMI = body mass index, CAT = COPD Assessment Test, CI = confidence interval, COPD = chronic obstructive pulmonary disease, FEV1 = forced expiratory volume in one second, FVC = forced vital capacity, GOLD = Global Initiative for Chronic Obstructive Lung Disease, HR= hazard ratio, LABA = long-acting beta agonist, LAMA = long-acting muscarinic antagonist, mMRC = modified Medical Research Council, OR = odds ratio, QoL = quality of life, RR = relative risk, Ref = reference, SAD = small airway disease, SGRQ = St George's Respiratory Questionnaire.

aCalculated.

**Supplementary Table S19** Symptom outcomes (indirect mapping)

| **Publication** | **GOLD classification** | **Study Population** | **Sample size, n** | **GOLD A and GOLD B, %** | **Study design** | **Exposure for Symptoms**  **GOLD A/B** | **Specific clinical outcome** | **Tool used to measure symptoms** | **Data reported for Symptoms**  **GOLD A/B** | **Symptoms scale HR/OR/RR  (95% CI)  GOLD A/B** |
| --- | --- | --- | --- | --- | --- | --- | --- | --- | --- | --- |
| Miravitlles 2015 [59] | NR | Indirect mapping GOLD AB combined | 3125 | Non-exacerbators GOLD A/B combined: 1894 (60.6%) | Cross-sectional study | More frequent mild (self-managed) or moderate (outpatient-treated) exacerbations | Symptom scale | CAT | Non-exacerbators, GOLD A/B combined  Unadjusted CAT score: 17.9 (8.1) | HR/OR/RR Not reported Non-exacerbators **GOLD A/B combined**  Adjusted CAT score,  Mean (95% CI): 18.6 (18.1–19)  [Adjusted for severity of airflow obstruction, sex and age] CAT scores were not significantly different among ACOS patients and exacerbators without chronic bronchitis and for non-exacerbators and exacerbators without chronic bronchitis, but were significantly different for other comparisons  (p < 0.001 for all). |
| Chai 2019 [8] | NR | Indirect mapping GOLD AB combined | 189 | Non-exacerbators (GOLD A/B combined): 28.6% | Cross-sectional study | More frequent mild (self-managed) or moderate (outpatient-treated) exacerbations | CAT symptom score | CAT | Non-exacerbators (GOLD A/B combined): 18.0 (8.0) | Non-exacerbators (GOLD A/B combined)  HR/OR/RR not reported  95% CI:  15.8–20.2  p-value between clinical phenotypes (Non-AE, AE NON-CB, AE CB, ACOS):  < 0.001 |
| CAT domain score | CAT | Non-exacerbators (GOLD A/B combined):  2.5 (1.2) |
| CAT domain score | CAT | Non-exacerbators (GOLD A/B combined):  2.6 (1.8) |
| CAT domain score | CAT | Non-exacerbators (GOLD A/B combined):  1.4 (1.7) |
| CAT domain score | CAT | Non-exacerbators (GOLD A/B combined):  3.4 (1.7) |
| CAT domain score | CAT | Non-exacerbators (GOLD A/B combined):  2.5 (1.8) |
| CAT domain score | CAT | Non-exacerbators (GOLD A/B combined):  1.7 (1.9) |
| CAT domain score | CAT | Non-exacerbators (GOLD A/B combined):  1.6 (1.6) |
| CAT domain score | CAT | Non-exacerbators (GOLD A/B combined):  2.4 (1.1) |
| Chai 2020 [9] | NR | Indirect mapping GOLD AB combined | 185 | Non-exacerbators (GOLD A/B combined): 58.4% | Cross-sectional study | More frequent mild (self-managed) or moderate (outpatient-treated) exacerbations | CAT symptom score | CAT | Non-exacerbators (GOLD A/B combined):  5.5 (4.7) | Non-exacerbators  HR/OR/RR not reported  95% CI: 4.6–6.4  p-value between clinical phenotypes (non-AE, ACO and AE): < 0.001 |
| CAT domain score | CAT | Non-exacerbators (GOLD A/B combined):  1.9 (1.3) |
| CAT domain score | CAT | Non-exacerbators (GOLD A/B combined):  1.3 (1.2) |
| CAT domain score | CAT | Non-exacerbators (GOLD A/B combined):  0.4 (0.7) |
| CAT domain score | CAT | Non-exacerbators (GOLD A/B combined):  0.9 (1.1) |
| CAT domain score | CAT | Non-exacerbators (GOLD A/B combined):  0.3 (0.7) |
| CAT domain score | CAT | Non-exacerbators (GOLD A/B combined):  0.2 (0.6) |
| CAT domain score | CAT | Non-exacerbators (GOLD A/B combined):  0.2 (0.6) |
| CAT domain score | CAT | Non-exacerbators (GOLD A/B combined):  0.3 (0.6) |
| mMRC dyspnoea score | mMRC | Non-exacerbators (GOLD A/B combined)  mMRC 0–1:  90 (83.3%) |
| mMRC dyspnoea score | mMRC | Non-exacerbators (GOLD A/B combined)  mMRC 2–4:  18 (16.7%) |
| Donaldson 2013 [19] | NR | Indirect mapping GOLD AB combined | 1832 | Infrequent-exacerbators (GOLD A/B combined): 70% | Prospective cohort study | More frequent mild (self-managed) or moderate (outpatient-treated) exacerbations | mMRC dyspnoea score | mMRC | iFE stayed as iFE: 1.5 (1.0)  FE changed to iFE: 1.8 (1.1) | p-value for comparison between those who stayed as iFE and those who changed to FE: 0.004  p-value for comparison between those who stayed as FE and changed to iFE: < 0.001 |

ACOS = asthma-COPD overlap syndrome, AE = adverse event, CAT = COPD Assessment Test, CI = confidence interval, COPD = chronic obstructive pulmonary disease, GOLD = Global Initiative for Chronic Obstructive Lung Disease, HR = hazard ratio, iFE = infrequent exacerbation, mMRC = modified Medical Research Council, OR = odds ratio, RR = relative risk, Ref = reference, SGRQ = St George's Respiratory Questionnaire.

**Supplementary Table S20** Healthcare resource utilization outcomes

| **Publication** | **GOLD classification** | **Study Population** | **Sample size, n** | **GOLD A and  GOLD B, %** | **Exposure for Economic outcomes**  **GOLD A/B** | **Time-point of assessment**  **GOLD A/B** | **HCRU data (Mean/median/rate)**  **GOLD A/B** |
| --- | --- | --- | --- | --- | --- | --- | --- |
| Casanova 2014 [7] | GOLD 2013 | GOLD A and GOLD B | 828 | GOLD A: 147 (17.8%)  GOLD B:  314 (37.9%) | Worse GOLD group of COPD severity, as defined by 2013, 2017 or 2020 criteria (among those in the A/B cohort) | Proportion of patients taking medications, Baseline; Hospitalisations, 12 months | Hospitalisation  GOLD A: Rate 0  GOLD B: Rate 0.6  (Percentage of patients experiencing hospitalisation in a year) |
| Chalmers 2018 [10] | GOLD 2017 | GOLD A and GOLD B | Pre-matching N = 4009  Post-matching N = 3478 | GOLD A  Pre-matching  ICS group:  1044 (59.8%)  Non-ICS group:  1479 (65.3%)  Post matching  ICS group:  1044 (60%)  Non-ICS group:  1068 (61.4%)  GOLD B  Pre-matching  ICS group:  701 (40.2%)  Non-ICS group:  785 (34.7%)  Post matching  ICS group:  695 (40.0%)  Non-ICS group:  671 (38.6%) | Worse GOLD group of COPD severity, as defined by 2013, 2017 or 2020 criteria (among those in the A/B cohort) | Proportion of patients taking medications,  3 months; Number of prescriptions, Baseline | Healthcare resource use  GOLD A/B combined  Physician visits (all-cause interaction)  ICS: 55,927 events (51% of all physician visits)  NON-ICS: 52,947 events  Physician visits (respiratory related planned visits)  ICS: 16,391 events (51% of all physician planned visits)  NON-ICS: 15,409 events  Physician visits (respiratory related unplanned visits)  ICS: 2,166 events (50.9% of all physician visits)  NON-ICS: 2085 events  Specialist visits: GOLD A/B combined Outpatient visits (all cause interaction)  ICS: 13,497 events (50.9% of all physician visits)  NON-ICS: 12,989 events  Outpatient visits (respiratory related visits):  ICS: 247 events  NON-ICS: 234 events.  Hospitalisation  GOLD A/B combined  Hospital visits (all cause interaction)  ICS: 3378 events  NON-ICS: 3200 events  GOLD A/B combined Outpatient visits (respiratory related visits)  ICS: 1751 events  NON-ICS: 1815 events |
| Dua 2019 [20] | GOLD 2017 | GOLD A and GOLD B | 413 | GOLD A: ‘n' not reported (48.9%)  GOLD B: ‘n' not reported (36.9%) | Worse GOLD group of COPD severity, as defined by 2013, 2017 or 2020 criteria (among those in the A/B cohort) | Hospitalisations, Baseline | Proportion of patients in GOLD A group based on combined assessment of mMRC scores and any-cause hospitalisation in past 1 year (not specifically hospitalisation due to severe exacerbation): 'n' not reported (52.78%); (Conference abstract, details unavailable)  Proportion of patients in GOLD B group based on combined assessment of mMRC scores and any-cause hospitalisation in past 1 year (not specifically hospitalisation due to severe exacerbation): 'n' not reported (41.64%)  (Conference abstract, details unavailable) |
| Grewe 2020 [29] | GOLD 2013 | GOLD A and GOLD B | 305 | GOLD A: NR  GOLD B: NR | Worse GOLD group of COPD severity, as defined by 2013, 2017 or 2020 criteria (among those in the A/B cohort) | Physician visits, 2.03 years (SD Not Reported); Maximum follow up: 7 years (Visit from 2011 on); Proportion of patients taking medications, 2.03 years (SD Not Reported); Maximum follow up: 7 years (Visit from 2011 on) | Physician visits, rate  GOLD A: 19%  GOLD B: 24.8% |
| Gunen 2015 [30] | GOLD 2013 | GOLD A and GOLD B | 1610 | GOLD A:  661 (41.1%)  GOLD B:  335 (20.8%) | Worse GOLD group of COPD severity, as defined by 2013, 2017 or 2020 criteria (among those in the A/B cohort) | Proportion of patients taking medications, Baseline; Hospitalisations within past 12 months, Baseline | Hospitalisation  GOLD A: 33 (10.3%)  GOLD B: 80 (25.1%) |
| Le 2019 [48] | GOLD 2017 | GOLD A and GOLD B | 921 | GOLD A:  225 (24.7%)  GOLD B:  476 (52.2%) | Worse GOLD group of COPD severity, as defined by 2013, 2017 or 2020 criteria (among those in the A/B cohort) | All-cause and Respiratory hospitalisations, 8 years | GOLD A  All-cause hospitalisations:  143 (63.6%)  Respiratory hospitalisations: 16 (7.1%) [Calculated]  GOLD B  All-cause hospitalisations:  401 (84.2%)  Respiratory hospitalisations: 132 (27.7%) [Calculated] |
| Poorer lung function as measured by FEV1, expressed as % predicted | All-cause and Respiratory hospitalisations, 8 years | Subgroup 2A  All-cause hospitalisations:  114 (60.6%)  Respiratory hospitalisations: 10 (5.3%) [Calculated]  Subgroup 2B  All-cause hospitalisations:  201 (82.4%)  Respiratory hospitalisations: 33 (13.5%) [Calculated] |
| Subgroup 3A  All-cause hospitalisations:  20 (76.9%)  Respiratory hospitalisations:  4 (15.4%) [Calculated]  Subgroup 3B  All-cause hospitalisations:  138 (84.7%)  Respiratory hospitalisations: 56 (34.4%) [Calculated] |
| Subgroup 4A  All-cause hospitalisations:  9 (81.8%)  Respiratory hospitalisations:  2 (18.2%) [Calculated]  Subgroup 4B  All-cause hospitalisations:  62 (89.9%)  Respiratory hospitalisations: 43 (62.3%) [Calculated] |
| Lee 2019 [49] | GOLD 2017 | GOLD A and GOLD B | 149 | GOLD A: 35 (23.5%)  GOLD B: 77 (51.7%) | Worse GOLD group of COPD severity, as defined by 2013, 2017 or 2020 criteria (among those in the A/B cohort) | Respiratory hospitalisations, Median follow-up: 61 months (Calculated in years: 5.1 years) | Hospitalisation rate  GOLD A: 6 (17.1%)  GOLD B: 25 (32.5%) |
| Merinopoulou 2016 [58] | GOLD 2013 | GOLD A and GOLD B | 44,201 (On the basis of available mMRC scores and history of exacerbations, 83.5% of the overall COPD cohort were classified into the GOLD 2013 severity categories) | GOLD A:  12,493 (28.3%)  GOLD B:  7752 (17.5%) | Worse GOLD group of COPD severity, as defined by 2013, 2017 or 2020 criteria (among those in the A/B cohort) | General Physician visits, 2011  COPD-related Hospitalisations, 2011  Non-COPD Hospitalisations, 2011  Proportion of patients taking medications  Baseline In 2011, total person-year at risk:  GOLD A: 11,893.16  GOLD B: 7195.80 | Annual Incident rate  Physician visit GOLD A:  Rate of visit (95% CI):  4.82 (4.74–4.93)  Physician visit GOLD B:  Rate of visit (95% CI):  5.91 (5.78–6.07)  Specialist visit: NR;  Hospitalisation GOLD A  Incidence rate of COPD-related hospitalisations  (95% CI): 0.22 (0.20–0.25)  Incidence rate of non-COPD hospitalisations (95% CI):  0.39 (0.38–0.40)  Hospitalisations GOLD B: Incidence rate of COPD-related hospitalisations  (95% CI): 0.48 (0.46–0.51)  Incidence rate of Non-COPD hospitalisations (95% CI):  0.45 (0.43–0.46): |
| General Physician visits, 2012  COPD-related Hospitalisations  2012, non-COPD Hospitalisations 2012  In 2012, total person-year at risk  GOLD A: 10,877.59  GOLD B: 6224.29 | Incident rate  Physician visit  GOLD A: Rate of visit  (95% CI): 4.82 (4.73–4.93)  GOLD B: Rate of visit  (95% CI): 5.66 (5.52–5.83)  Specialist visits: NR  Hospitalisation  GOLD A  Incidence rate of COPD-related hospitalisations  (95% CI): 0.29 (0.25–0.33)  Incidence rate of non-COPD hospitalisations (95% CI): 0.44 (0.43–0.45)  GOLD B:  Incidence rate of COPD-related hospitalisations  (95% CI): 0.53 (0.50–0.56)  Incidence rate of non-COPD hospitalisations (95% CI): 0.43 (0.42–0.45) |
| General Physician visits, 2013  COPD-related hospitalisations, 2013  non-COPD hospitalisations, 2013  In 2013, total person-year at risk  GOLD A: 8957.15  GOLD B: 4888.70 | Incident rate  Physician visit  GOLD A: Rate of visit  (95% CI): 4.72 (4.62–4.84)  GOLD B: Rate of visit  (95% CI): 5.71 (5.54–5.89)  Specialist visits: NR  Hospitalisation GOLD A  Incidence rate of COPD-related hospitalisations  (95% CI): 0.35 (0.31–0.40)  Incidence rate of non-COPD hospitalisations (95% CI):  0.39 (0.37–0.40)  GOLD B  Incidence rate of COPD-related hospitalisations  (95% CI): 0.57 (0.54–0.61)  Incidence rate of non-COPD hospitalisations (95% CI):  0.42 (0.41–0.44)  Emergency department visit: NR  Length of stay: NR |
| Ngo 2018 [61] | GOLD 2017 | GOLD A and GOLD B | 57 | GOLD A: NR  GOLD B: NR | Worse GOLD group of COPD severity, as defined by 2013, 2017 or 2020 criteria (among those in the A/B cohort) | Duration of hospitalisations, Baseline (no follow-up as cross-sectional survey); Proportion of patients on therapy, Baseline (no follow-up as cross-sectional survey) | Length of stay  GOLD A mean duration of hospitalisation (days): 5.3 (1.5)  GOLD B mean duration of hospitalisation (days): 8.4 (4.7) |

CI = confidence interval, COPD = chronic obstructive pulmonary disease, GOLD Global Initiative for Chronic Obstructive Lung Disease, HCRU = healthcare resource utilisation, ICS = inhaled corticosteroid, mMRC = modified medical research council, NR = not reported.

**Supplementary Table S21** Cost outcomes

| **Publication** | **GOLD classification** | **Study Population** | **Sample size, n** | **GOLD A and  GOLD B, %** | **Exposure for Economic outcomes**  **GOLD A/B** | **Time-point of assessment**  **GOLD A/B** | **Direct disaggreg-ated costs**  **GOLD A/B** | **Total direct costs GOLD A/B** | **Indirect disaggregated costs**  **GOLD A/B** | **Total indirect costs**  **GOLD A/B** |
| --- | --- | --- | --- | --- | --- | --- | --- | --- | --- | --- |
| Gayle 2018 [25] | GOLD 2017 | GOLD A and GOLD B | 19,268 | GOLD A: 7792 (48%)  GOLD B: 5839 (36%) | Worse GOLD group of COPD severity, as defined by 2013, 2017 or 2020 criteria (among those in the A/B cohort) | Proportion of patients taking medications, Baseline | NR | GOLD group A  Actual cost: £465  GOLD cost: £275  GOLD group B  Actual cost: £568  GOLD cost: £392 | NR | NR |
| Kamusheva 2017 [43] | GOLD 2013 | GOLD A and GOLD B | 426 | GOLD A: 30 (7.06%)  GOLD B: 149 (35.06%) | Worse GOLD group of COPD severity, as defined by 2013, 2017 or 2020 criteria (among those in the A/B cohort) | Proportion of prescriptions, Baseline (no follow-up as cross-sectional survey) | Specialist visit cost  GOLD A: €15.89  GOLD B: €19.03  Hospitalisation costs, GOLD B: €215.94  GP visits costs, GOLD B: €6.95 | Data reported for overall population | Productivity losses  GOLD A: €575.11  GOLD B: €692.51 | NR |
| Løkke 2020 [52] | GOLD 2017 | GOLD A and GOLD B | 82,633 | GOLD A: NR  GOLD B: NR | Worse GOLD group of COPD severity, as defined by 2013, 2017 or 2020 criteria (among those in the A/B cohort) | NR | NR | GOLD A:  €8687  GOLD B: €12,884  Overall population annual health care costs, including direct costs, costs for elderly care, and costs for retirement home, overall population (GOLD A/B/C/D): €31,441  Average costs per moderate exacerbation: €876  Average costs per severe exacerbation: €6933 | NR | NR |
| Ngo 2018 [61] | GOLD 2017 | GOLD A and GOLD B | 57 | GOLD A: NR  GOLD B: NR | Worse GOLD group of COPD severity, as defined by 2013, 2017 or 2020 criteria (among those in the A/B cohort) | Duration of hospitalisation, Baseline (no follow-up as cross-sectional survey)  Proportion of patients on therapy, Baseline (no follow-up as cross-sectional survey) | Hospitalisation cost in Million VND, mean (SD)  GOLD A  Bed-day:  0.5 (0.2)  Blood tests:  1.1 (0.7)  Imaging diagnosis:  0.4 (0.3)  Functional tests:  0.3 (0.5)  Procedures: 1.2 (1.3)  Medication:  2.7 (1.6)  Equipment and supplies:  0.1 (0.1)  GOLD B:  Bed-day: 1.5 (0.5)  Blood tests:  1.7 (1.2)  Imaging diagnosis:  0.7 (0.7)  Functional tests:  0.1 (0.2)  Procedures: 1.8 (2)  Medication:  8.1 (5.7)  Equipment and supplies:  0.2 (0.2) | GOLD group A  Total cost:  6.4 (0.4)  Hospitalisation cost per day:  1.3 (0.3)  GOLD group B:  Total cost:  14.1 (8.6)  Hospitalisation cost per day:  2.8 (4.5) | NR | NR |
| Stafyla 2018 [73] | GOLD 2013 | GOLD A and GOLD B | 245 | GOLD A: 57 (23.3%)  GOLD B: 38 (15.5%) | Worse GOLD group of COPD severity, as defined by 2013, 2017 or 2020 criteria (among those in the A/B cohort) | NR | Direct medical cost  GOLD A:  Pharmaceutical treatment: 444.58 (410.77)  Medical visits: 39.73 (74.03)  Laboratory/ functional/ imaging tests: 14.52 (25.63)  Other treatments  LTOT:  18.95 (143.05)  Vaccination: 14.22 (24.75)  Direct medical cost, GOLD B  Pharmaceutical treatment: 551.25 (406.61)  Medical visits: 26.58 (53.55)  Laboratory/ functional/ imaging tests: 25.53 (50.14)  Other treatments  LTOT:  125.53 (339.69)  Vaccination: 12.36 (22.71)  Direct non-medical cost (Transportation cost)  GOLD A:  18.01 (24.78)  GOLD B:  26.95 (35.03)  Social insurance funds’ expenses per patient  GOLD A: 412.55 (414.35)  GOLD B: 593.64 (560.72)  Out-of-pocket payments per patient  GOLD A: 137.46 (124.82)  GOLD B: 174.56 (131.00) | GOLD group A total direct cost: 550.01 (535.59)  GOLD group B total direct cost: 768.20 (644.63) | NR | NR |

COPD = chronic obstructive pulmonary disease, GOLD = Global Initiative for Chronic Obstructive Lung Disease, LTOT = Long-term oxygen therapy, NR = not reported, SD = standard deviation.

**Supplementary Table S22** Health-related quality of life outcomes

| **Publication** | **GOLD classification** | **Study Population** | **Sample size, n** | **GOLD A and  GOLD B, %** | **Exposure for HRQoL outcomes**  **GOLD A/B** | **Time-point of assessment (e.g., Patients were assessed at baseline,  1-year post-treatment)**  **GOLD A/B** | **Description of HRQoL tools/scales used in study**  **GOLD A/B** | **Mean QoL score**  **GOLD A/B** | **Median QoL score**  **GOLD A/B** | **Group difference OR, IRR, RR, HR (95% CI)**  **GOLD A/B** |
| --- | --- | --- | --- | --- | --- | --- | --- | --- | --- | --- |
| Choi 2018 [14] | GOLD 2017 | GOLD B only | 2010 | GOLD A 433: (21.5%)  GOLD B: 1261 (62.7%) | Worse GOLD group of COPD severity, as defined by 2013, 2017 or 2020 criteria (among those in the A/B cohort) | 12 months | SGRQ Symptom sub-score (SGRQ-S) | GOLD B: 45.9 (18.4) | NR | GOLD A: NR  GOLD B  SGRQ-S scores (OR 1.024, 95% CI 1.010–1.039, p = 0.001) was significantly associated with progression from GOLD B to GOLD D at 1 year after adjusting for sex, BMI, the presence of chronic bronchitis, the SGRQ-A, SGRQ total and CAT scores, a history of GERD, and exacerbation frequency at baseline |
| SGRQ Activity  sub-score (SGRQ-A) | GOLD B: 51.6 (20.8) | NR |
| SGRQ Impact  sub-score (SGRQ-I) | GOLD B: 28.2 (18.9) | NR |
| SGRQ  Total score | GOLD B: 38.3 (17.0) | NR |
| Cho 2019 [13] | GOLD 2017 | GOLD A only | 340 | GOLD A: 100%  GOLD B: 0% | Worse GOLD group of COPD severity, as defined by 2013, 2017 or 2020 criteria (among those in the A/B cohort) |  | SGRQ-C | NR | NR | GOLD A, Mean change from baseline: No regular treatment:  6.6 (4.4–8.7),  p < 0.001  Regular treatment: 1.6  (–1.3 to –4.5),  p = 0.285  Significant difference in favour of regular treatment  Mean between-group difference: –5.0 (–8.6 to –1.4),  p = 0.007 and NA (Study only included GOLD A patients) |
| Gupta 2018 [31] | GOLD 2013 | GOLD A and GOLD B | 109 | GOLD A: 43.1%  GOLD B: 27.5% | Worse GOLD group of COPD severity, as defined by 2013, 2017 or 2020 criteria (among those in the A/B cohort) |  | SGRQ | NR | NR | HR/OR/RR (95% CI) not reported  With increasing stages of COPD and increasing severity of pulmonary hypertension, a significant increase in all sub-scale as well as total scores of SGRQ was observed  (p < 0.001) |
| Lawrence 2017 [47] | GOLD 2013 | GOLD B only | 370 | GLOLD A 34 (9.2%)  GOLD B 107 (28.9%) | Worse GOLD group of COPD severity, as defined by 2013, 2017 or 2020 criteria (among those in the A/B cohort) | 12 months | SGRQ Overall score | Patients who remained in GOLD B: 41.1 (15.5) | NR | HR/OR/RR (95% CI) not reported  p-value between group B and D: 0.001 |
| SGRQ Symptom sub-score | Patients who remained in GOLD B: 54.6 (19.9) | NR | HR/OR/RR (95% CI) not reported  p-value between group B and D: 0.24 |
| SGRQ Impact sub-score | NR | Patients who remained in GOLD B: 26.3 (2.1–71.6) | HR/OR/RR (95% CI) not reported  p-value between group B and D: 0.05 |
| SGRQ Activities sub-score | NR | Patients who remained in GOLD B: 59.3 (0.0–100.0) | HR/OR/RR (95% CI) not reported  p-value between group B and D: 0.003 |
| Baseline | CAT  Overall score | NR | Patients who remained in GOLD B: 14.0 (4.0–28.0) | HR/OR/RR (95% CI) not reported  p-value between group B and D: 0.006 |
| SGRQ Overall score | NR | Patients who remained in GOLD B: 40.1 (14.6–80.0) | HR/OR/RR (95% CI) not reported  p-value between group B and D: 0.019 |
| SGRQ Symptom sub-score | NR | Patients who remained in GOLD B: 55.1 (22.0–91.0) | HR/OR/RR (95% CI) not reported  p-value between group B and D: 0.10 |
| SGRQ Impact sub-score | NR | Patients who remained in GOLD B: 26.0 (2.5–71.6) | HR/OR/RR (95% CI) not reported  p-value between group B and D: 0.20 |
| SGRQ Activities sub-score | NR | Patients who remained in GOLD B: 59.3 (7.6–100.0) | HR/OR/RR (95% CI) not reported  p-value between group B and D: 0.003 |
| GOLD A and GOLD B | 370 | GOLD A:  34 (9.2%)  GOLD B:107 (28.9%) | Worse GOLD group of COPD severity, as defined by 2013, 2017 or 2020 criteria (among those in the A/B cohort) | Baseline | SGRQ Overall score | NR | GOLD A: 19.3 (Range 1.0–40.0)  GOLD B: 40.9 (Range 5.7–82.4) | HR/OR/RR (95% CI) not reported  p-value between group A and B: < 0.0001 |
| SGRQ Symptom sub-score | GOLD A: 29.5 (16.5)  GOLD B: 55.3 (17.8) | NR |
| SGRQ Impact sub-score | NR | GOLD A: 12.0 (Range 3.0–24.0)  GOLD B: 25.0 (Range 0.0–75.5) |
| SGRQ Activities sub-score | GOLD A: 34.8 (18.5)  GOLD B: 58.9 (22.6) | NR |
| Candemir 2018 [6] | GOLD 2017 | GOLD A and GOLD B | 427 | GOLD A:  73 (17%)  GOLD B: 103 (24%) | Worse GOLD group of COPD severity, as defined by 2013, 2017 or 2020 criteria (among those in the A/B cohort) | Baseline | SGRQ Overall score | GOLD A: 41 (16)  GOLD B: 64 (14) | NR | HR/OR/RR (95% CI) not reported  p-values for between group comparisons:  Groups A–B:  p < 0.001 A–C: p = 0.031 A–D: p < 0.001 B–C: p < 0.001 B–D: p = 0.002 |
| Baseline | SGRQ mMRC dyspnoea score | GOLD A: 0.9 (0.2)  GOLD B: 2.4 (0.6) |  | HR/OR/RR (95% CI) not reported  p-value for between group comparisons  < 0.001  Correlation coefficient (r) of mMRC with FEV1: –0.473, p < 0.001 |
| Hogman 2018 [34] | GOLD 2014 and GOLD 2017 used in the study, data relevant for GOLD 2017 groups extracteda | GOLD A and GOLD B | 571 | GOLD A: 188 (32.9%) (Calculated)  Group C changing to group A:  33  Group A remaining in group A: 155  GOLD B: 244 (42.7%) (Calculated)  Group D changing to group B: 96  Group B remaining in group B: 148 | Worse GOLD group of COPD severity, as defined by 2013, 2017 or 2020 criteria (among those in the A/B cohort) | Baseline | CCQ Overall score | GOLD A (Group C changing to group A):  0.92 (0.55)  GOLD A (Group A remaining in group A):  0.80 (0.50)  GOLD B (Group D changing to group B):  2.4 (1.0)  GOLD B (Group D changing to group B):  1.8 (1.1) | NR | HR/OR/RR (95% CI) not reported  p-values for comparison with reference group C changing to group A: 0.66  Comparison with reference group D changing to group B: < 0.001 |
| GLOLD A: 155 (27.1%) (Calculated)  GOLD B: 148 (26%) (Calculated) | Worse GOLD group of COPD severity, as defined by 2013, 2017 or 2020 criteria (among those in the A/B cohort) | Baseline | CCQ  Overall score | GOLD A: 0.8 (0.5)  GOLD B: 1.9 (0.8) | NR | HR/OR/RR (95% CI) not reported  p-values for between group comparisons: Groups A–B:  < 0.001 |
| Horner 2020 [35] | GOLD 2017 | GOLD A and GOLD B | 850 | NR | Worse GOLD group of COPD severity, as defined by 2013, 2017 or 2020 criteria (among those in the A/B cohort) | Baseline (Cross-sectional survey, no follow up assessment) | SGRQ-C Overall score | GOLD A/B combined: 37.9  (SD not reported) | NR | Significant predictors for higher total SGRQ-c score: More severe airflow limitation, frequent exacerbations, and pre-existing diabetes mellitus and cardiac disease  All p-values: < 0.001 |
| SGRQ-C Symptom sub-score | GOLD A/B combined: 51.9  (SD not reported) | NR |
| SGRQ-C Activities sub-score | GOLD A/B combined: 49.9  (SD not reported) | NR |
| SGRQ-C Impact  sub-score | GOLD A/B combined: 25.6  (SD not reported) | NR |
| Mehta 2014 [56] | GOLD 2013 | GOLD A and GOLD B | 59 | GOLD A:  10 (16.9%) (Calculated)  GOLD B:  11 (18.6%) (Calculated) | Worse GOLD group of COPD severity, as defined by 2013, 2017 or 2020 criteria (among those in the A/B cohort) | Baseline (Cross-sectional survey, no follow up assessment) | SGRQ Overall score | GOLD A: 31.7 (18.1)  GOLD B: 47.9 (20.5) | NR | Overall population (GOLD A/B/C/D)  Patients with depression and anxiety disorders were likely to have poorer quality of life represented by higher SGRQ score (p < 0.001 and p = 0.02, respectively) |
| SGRQ Symptom sub-score | GOLD A: 41.2 (22.5)  GOLD B: 58.6 (20.8) | NR |
| SGRQ Activity  sub-score | GOLD A: 36.9 (22.3)  GOLD B: 53.6 (24.2) | NR |
| SGRQ  Effect  sub-score | GOLD A: 26.1 (21.4)  GOLD B: 41.7 (20.8) | NR |
| Plutinsky 2019 [66] | GOLD pre-2011, 2011–2016 and 2017 used, economic outcomes for GOLD "2011–2016" extracted here | GOLD A and GOLD B | 720 | GOLD A:  35 (4.9%)  GOLD B: 150 (20.8%) | Worse GOLD group of COPD severity, as defined by 2013, 2017 or 2020 criteria (among those in the A/B cohort) | 48 months | SGRQ Total score | GOLD A: 22.0 (11.2)  GOLD B: 38.7 (16.1) | NR | p-value for comparison across all GOLD groups (A–D):  < 0.001 |
| SGRQ Impact  sub-score (SGRQ-I) | GOLD A: 14.0 (9.8)  GOLD B: 30.3 (16.8) | NR | p-value for comparison across all GOLD groups (A–D):  < 0.001 |
| SGRQ Activity  sub-score (SGRQ-A) | GOLD A: 31.3 (19.4)  GOLD B: 53.2 (20.9) | NR | p-value for comparison across all GOLD groups (A–D):  < 0.001 |
| SGRQ Symptom sub-score (SGRQ-S) | GOLD A: 26.2 (12.9)  GOLD B: 40.9 (20.7) | NR | p-value for comparison across all GOLD groups (A–D):  < 0.001 |
| GOLD pre-2011, 2011–2016 and 2017 used in the study, economic outcomes for GOLD 2017 extracted here | GOLD A:  61 (8.5%)  GOLD B: 380 (52.8%) | Worse GOLD group of COPD severity, as defined by 2013, 2017 or 2020 criteria (among those in the A/B cohort) | 48 months | SGRQ  Total score | GOLD A: 22.8 (10.8)  GOLD B: 44.5 (15.0) | NR | p-value for comparison across all GOLD groups (A–D):  < 0.001 |
| SGRQ Impact  sub-score (SGRQ-I) | GOLD A: 15.3 (9.5)  GOLD B: 35.7 (16.7) | NR | p-value for comparison across all GOLD groups (A–D):  < 0.001 |
| SGRQ Activity  sub-score (SGRQ-A) | GOLD A: 34.4 (18.8)  GOLD B: 61.7 (19.0) | NR | p-value for comparison across all GOLD groups (A–D):  < 0.001 |
| SGRQ Symptom sub-score (SGRQ-S) | GOLD A: 25.5 (14.9)  GOLD B: 41.0 (20.4) | NR | p-value for comparison across all GOLD groups (A–D):  < 0.001 |
| Song 2018 [72] | GOLD 2007, 2013, and 2017 classifications used in the study, economic outcomes for GOLD 2013 extracted here | GOLD A and GOLD B | 1880 | GOLD A: 335 (17.8%)  GOLD B: 701 (37.5%) | Worse GOLD group of COPD severity, as defined by 2013, 2017 or 2020 criteria (among those in the A/B cohort) | 12 months | CAT  Overall score | Score difference from baseline  GOLD A: 1.7 (4.7)  GOLD B:  –1.6 (6.8) | NR | HR/OR/RR (95% CI) not reported  p-value for change from baseline compared across GOLD  A–D: < 0.001 |
| SGRQ Overall score | Score difference from baseline:  GOLD A: 0.6 (9.5)  GOLD B:  –2.8 (14.9) | NR | HR/OR/RR (95% CI) not reported  p-value for change from baseline compared across GOLD  A–D: 0.017 |
| GOLD A: 418 (22.2%)  GOLD B: 1150 (61.2%) | Worse GOLD group of COPD severity, as defined by 2013, 2017 or 2020 criteria (among those in the A/B cohort) | 12 months | SGRQ Overall score | Score difference from baseline:  GOLD A: 1.0 (11.1)  GOLD B:  –1.8 (16.1) | NR | HR/OR/RR (95% CI) not reported  p-value for change from baseline compared across GOLD  A–D: 0.023 |
| Sun 2017 [74] | GOLD 2017 | GOLD A and GOLD B | 1532 | GOLD A: 557 (36.4%)  GOLD B: 405 (26.4%) | Worse GOLD group of COPD severity, as defined by 2013, 2017 or 2020 criteria (among those in the A/B cohort) | Baseline (Cross-sectional survey-No follow up assessment) | SF-36 - PCS (Physical Component Summary) | GOLD A: 68 (19.3)  GOLD B: 51 (19.2) | NR | NR |
| SF-36 - MCS (Medical Component Summary) | GOLD A: 73.8 (23.3)  GOLD B: 56 (25.1) | NR | NR |
| Von Siemens 2019 [79] | GOLD 2017 | GOLD A and GOLD B | 2255 | GOLD A: 871 (38.6%) (Calculated)  GOLD B: 567 (25.1%) (Calculated) | Worse GOLD group of COPD severity, as defined by 2013, 2017 or 2020 criteria (among those in the A/B cohort) | Baseline | EQ-5D Overall score | GOLD A: 67.0 (16.8)  GOLD B: 50.3 (16.1) | NR | NR |
| Zhou 2020 [83] | GOLD 2017 | GOLD A and GOLD B | 1241 | GOLD A: 123 (9.9%)  GOLD B: 579 (46.7%) | Poorer lung function as measured by FEV1, expressed as % predicted | Baseline (Cross-sectional survey-No follow up assessment) | CCQ  Overall score | GOLD 1A: 1.06 (0.38) | NR | NR |
| GOLD 2A: 1.33 (0.22) | NR | NR |
| GOLD 3A: 1.36 (0.44) | NR | NR |
| GOLD 4A: 1.51 (0.35) | NR | NR |
| GOLD 1B: 1.99 (0.46) | NR | NR |
| GOLD 2B: 2.01 (0.43) | NR | NR |
| GOLD 3B: 2.18 (0.64) | NR | NR |
| GOLD 4B: 2.46 (0.47) | NR | NR |
| CCQ Domain score (Symptom) | GOLD 1A: 1.39 (0.55) | NR | NR |
| GOLD 2A: 1.31 (0.47) | NR | NR |
| GOLD 3A: 1.79 (0.49) | NR | NR |
| GOLD 4A: 1.68 (0.65) | NR | NR |
| GOLD 1B: 2.38 (0.55) | NR | NR |
| GOLD 2B: 2.37 (0.65) | NR | NR |
| GOLD 3B: 2.49 (0.79) | NR | NR |
| GOLD 4B: 2.75 (0.76) | NR | NR |
| CCQ Domain score (Functional) | GOLD 1A: 0.76 (0.52) | NR | NR |
| GOLD 2A: 0.95 (0.49) | NR | NR |
| GOLD 3A: 1.31 (0.46) | NR | NR |
| GOLD 4A: 1.37 (0.52) | NR | NR |
| GOLD 1B: 1.67 (0.64) | NR | NR |
| GOLD 2B: 1.69 (0.49) | NR | NR |
| GOLD 3B: 1.92 (0.72) | NR | NR |
| GOLD 4B: 2.28 (0.55) | NR | NR |
| CCQ Domain score (Mental) | GOLD 1A: 1.02 (0.92) | NR | NR |
| GOLD 2A: 1.38 (1.25) | NR | NR |
| GOLD 3A: 1.20 (0.92) | NR | NR |
| GOLD 4A: 1.53 (1.11) | NR | NR |
| GOLD 1B: 1.82 (1.11) | NR | NR |
| GOLD 2B: 1.91 (1.01) | NR | NR |
| GOLD 3B: 1.99 (1.15) | NR | NR |
| GOLD 4B: 2.06 (1.03) | NR | NR |

BMI = body mass index, CAT = COPD assessment test, CCQ = clinical COPD questionnaire, CI = confidence interval, COPD = chronic obstructive pulmonary disease, FEV1 = forced expiratory volume in one second, GERD = gastroesophageal reflux disease, GOLD = Global Initiative for Chronic Obstructive Lung Disease, HR = hazard ratio, HRQoL = health-related quality of life, IRR = incident rate ratio, mMRC = modified medical research council, NR = not reported, OR = odds ratio, QoL = quality of life, RR: relative risk, SD = standard deviation, SF-36 = 36-item short form health survey, SGRQ = St. George's respiratory questionnaire.

**a**For GOLD 2017, subjects in Group C changing to group A, subjects in Group A remaining in group A, subjects in Group D changing to group B, and subjects in Group B remaining in group B.

**Supplementary Table S23** Health-related quality of life outcomes (indirect mapping)

| **Publication** | **GOLD classification** | **Study Population** | **Sample size, n** | **GOLD A and GOLD B, %** | **Exposure for HRQoL outcomes GOLD A/B** | **Time-point of assessment  (e.g., Patients were assessed at baseline,  1-year post-treatment) GOLD A/B** | **Description of HRQoL tools/scales used in study GOLD A/B** | **Mean QoL score GOLD A/B** | **Median QoL score GOLD A/B** | **Group difference OR, IRR, RR, HR (95% CI) GOLD A/B** |
| --- | --- | --- | --- | --- | --- | --- | --- | --- | --- | --- |
| Chai 2019 [8] | NR | Indirect mapping GOLD AB combined | 189 | GOLD A non-exacerbators GOLD A/B combined: 54 (28.6%)  GOLD B non-exacerbators GOLD A/B combined: 54 (28.6%) | More frequent mild (self-managed) or moderate (outpatient-treated) exacerbations | Baseline (Cross-sectional survey-No follow up assessment) | CAT  Overall score | Non-exacerbators (GOLD A/B combined): 18.0 (8.0) | NR | Non-exacerbators (GOLD A/B combined):  HR/OR/RR not reported  95% CI: 15.8–20.2  p-value between clinical phenotypes (Non-AE, AE NON-CB, AE CB, ACOS): < 0.001 |
| CAT - Cough (CAT questionnaire Item 1) | Non-exacerbators (GOLD A/B combined): 2.5 (1.2) | NR | Non-exacerbators (GOLD A/B combined):  HR/OR/RR not reported  95% CI: 2.1–2.8  p-value between clinical phenotypes (Non-AE, AE NON-CB, AE CB, ACOS): < 0.001 |
| CAT  Phlegm (CAT questionnaire Item 2) | Non-exacerbators (GOLD A/B combined): 2.6 (1.8) | NR | Non-exacerbators (GOLD A/B combined):  HR/OR/RR not reported  95% CI: 2.1–3.0  p-value between clinical phenotypes (Non-AE, AE NON-CB, AE CB, ACOS): < 0.001 |
| CAT  Chest tightness (CAT questionnaire Item 3) | Non-exacerbators (GOLD A/B combined): 1.4 (1.7) | NR | Non-exacerbators (GOLD A/B combined):  HR/OR/RR mot reported  95% CI: 0.9–1.8  p-value between clinical phenotypes (Non-AE, AE NON-CB, AE CB, ACOS): < 0.001 |
| CAT Breathlessness (CAT questionnaire Item 4) | Non-exacerbators (GOLD A/B combined): 3.4 (1.7) | NR | Non-exacerbators (GOLD A/B combined)  HR/OR/RR not reported  95% CI: 3.0–3.9  p-value between clinical phenotypes (Non-AE, AE NON-CB, AE CB, ACOS): 0.020 |
| CAT  Activity limitation (CAT questionnaire Item 5) | Non-exacerbators (GOLD A/B combined): 2.5 (1.8) | NR | Non-exacerbators (GOLD A/B combined):  HR/OR/RR not reported  95% CI: 2.0–3.0  p-value between clinical phenotypes (Non-AE, AE NON-CB, AE CB, ACOS): 0.038 |
| CAT Confidence in leaving home (CAT questionnaire Item 6) | Non-exacerbators (GOLD A/B combined): 1.7 (1.9) | NR | Non-exacerbators (GOLD A/B combined)  HR/OR/RR not reported  95% CI: 1.2–2.2  p-value between clinical phenotypes (Non-AE, AE NON-CB, AE CB, ACOS): 0.022 |
| CAT  Sleep (CAT questionnaire Item 7) | Non-exacerbators (GOLD A/B combined): 1.6 (1.6) | NR | Non-exacerbators (GOLD A/B combined):  HR/OR/RR not reported  95% CI: 1.2–2.1  p-value between clinical phenotypes (Non-AE, AE NON-CB, AE CB, ACOS): 0.127 |
| CAT  Energy (CAT questionnaire Item 8) | Non-exacerbators (GOLD A/B combined): 2.4 (1.1) | NR | Non-exacerbators (GOLD A/B combined):  HR/OR/RR not reported  95% CI: 2.1–2.7  p-value between clinical phenotypes (Non-AE, AE NON-CB, AE CB, ACOS): 0.004 |
| SGRQ-c Overall score | Non-exacerbators (GOLD A/B combined): 42.6 (20.1) | NR | Non-exacerbators (GOLD A/B combined):  HR/OR/RR Not reported  95% CI :37.1–48.1  p-value between clinical phenotypes (Non-AE, AE NON-CB, AE CB, ACOS): < 0.001 |
| SGRQ-c Symptom sub-score | Non-exacerbators (GOLD A/B combined): 36.8 (19.9) | NR | Non-exacerbators (GOLD A/B combined):  HR/OR/RR not reported  95% CI: 31.4–42.3  p-value between clinical phenotypes (Non-AE, AE NON-CB, AE CB, ACOS): < 0.001 |
| SGRQ-c Activities sub-score | Non-exacerbators (GOLD A/B combined): 48.9 (32.5) | NR | Non-exacerbators (GOLD A/B combined):  HR/OR/RR not reported  95% CI: 40.1–57.8  p-value between clinical phenotypes (Non-AE, AE NON-CB, AE CB, ACOS): 0.001 |
| SGRQ-c Impact sub-score | Non-exacerbators (GOLD A/B combined): 40.9 (20.1) | NR | Non-exacerbators (GOLD A/B combined):  HR/OR/RR not reported  95% CI: 35.4–46.3  p-value between clinical phenotypes (Non-AE, AE NON-CB, AE CB, ACOS): 0.001 |
| Chai 2020 [9] | NR | Indirect mapping GOLD AB combined | 185 | GOLD A non-exacerbators (GOLD A/B combined): 108 (58.4%)  GOLD B non-exacerbators (GOLD A/B combined): 108 (58.4%) | More frequent mild (self-managed) or moderate (outpatient-treated) exacerbations | Baseline (Cross-sectional survey-No follow up assessment) | CAT  Overall score | Non-exacerbators (GOLD A/B combined): 5.5 (4.7) | NR | Non-exacerbators (GOLD A/B combined):  HR/OR/RR not reported  95% CI: 4.6–6.4  p-value between clinical phenotypes (Non-AE, ACO and AE): < 0.001 |
| CAT  Cough (CAT questionnaire Item 1) | Non-exacerbators (GOLD A/B combined): 1.9 (1.3) | NR |
| CAT  Mucus (CAT questionnaire Item 2) | Non-exacerbators (GOLD A/B combined): 1.3 (1.2) | NR |
| CAT  Chest tightness (CAT questionnaire Item 3) | Non-exacerbators (GOLD A/B combined): 0.4 (0.7) | NR |
| CAT  Walk uphill (CAT questionnaire Item 4) | Non-exacerbators (GOLD A/B combined): 0.9 (1.1) | NR |
| CAT  Home activity (CAT questionnaire Item 5) | Non-exacerbators (GOLD A/B combined): 0.3 (0.7) | NR |
| CAT  Leaving home (CAT questionnaire Item 6) | Non-exacerbators (GOLD A/B combined): 0.2 (0.6) | NR |
| CAT  Sleep (CAT questionnaire Item 7) | Non-exacerbators (GOLD A/B combined): 0.2 (0.6) | NR |
| CAT  Energy (CAT questionnaire Item 8) | Non-exacerbators (GOLD A/B combined): 0.3 (0.6) | NR |
| SGRQ-c Overall score | Non-exacerbators (GOLD A/B combined): 16.4 (14.8) | NR | Non-exacerbators (GOLD A/B combined):  HR/OR/RR not reported  95% CI: 13.5–19.2  p-value between clinical phenotypes (Non-AE, ACO and AE): < 0.001 |
| SGRQ-c Symptom sub-score | Non-exacerbators (GOLD A/B combined): 18.3 (14.3) | NR |
| SGRQ-c Activities sub-score | Non-exacerbators (GOLD A/B combined): 27.1 (23.2) | NR |
| SGRQ-c Impact sub-score | Non-exacerbators (GOLD A/B combined): 9.3 (14.3) | NR |
| Donaldson 2013 [19] | NR | Indirect mapping GOLD AB combined | 1832 | GOLD A infrequent-exacerbators (GOLD A/B combined): 1289 (70%)  GOLD B infrequent-exacerbators (GOLD A/B combined): 1289 (70%) | More frequent mild (self-managed) or moderate (outpatient-treated) exacerbations | 24 months | SGRQ  Overall score | iFE stayed as iFE:  41 (18)  FE changed to iFE:  50 (16) | NR | p-value for comparison between those who stayed as iFE and those who changed to FE: < 0.001  p-value for comparison between those who stayed as FE and changed to iFE:  < 0.001 |
| 12 months | SGRQ  Overall score | Infrequent exacerbators: 43 (21)  Mean (SD) change from baseline:  iFE stayed as iFE: –2.0 (10.6) p-value: 0.879;  FE changed to iFE:  –0.1 (10.2) | NR | NR |
| Miravitlles 2015 [59] | NR | Indirect mapping GOLD AB combined | 3125 | GOLD A non-exacerbators GOLD A/B combined: 1894 (60.6%)  GOLD B non-exacerbators GOLD A/B combined: 1894 (60.6%) | More frequent mild (self-managed) or moderate (outpatient-treated) exacerbations | Baseline (Cross-sectional survey – no follow up assessment) | EQ - 5D Index Overall score | Non-exacerbators (GOLD A/B combined): 0.69 (0.29) | NR | NR |
| EQ - 5D VAS Overall score | Non-exacerbators (GOLD A/B combined): 60.4 (17.7) | NR | NR |
| EQ - 5D Index Overall score | NR | NR | HR/OR/RR not reported  Non-exacerbators (GOLD A/B combined)  Adjusted EQ-5D Index score  Mean (95% CI): 0.68 (0.66–0.69) [Adjusted for severity of airflow obstruction, sex and age]; EQ-5D index score was significantly different for all comparisons with non-exacerbator phenotype. |
| EQ - 5D VAS Overall score | NR | NR | HR/OR/RR not reported  Non-exacerbators (GOLD A/B combined)  Adjusted EQ-5D VAS score  Mean (95% CI): 58.1 (56.8–59.3) [Adjusted for severity of airflow obstruction, sex and age]; EQ-5D VAS score was significantly different for all comparisons with non-exacerbator phenotype. |

ACOS = asthma-COPD overlap syndrome, AE = adverse event, CAT = COPD assessment test, CI = confidence interval, CCQ = clinical COPD questionnaire, COPD = chronic obstructive pulmonary disease, FEV1 = forced expiratory volume in one second, GOLD = Global Initiative for Chronic Obstructive Lung Disease, HR = hazard ratio, HRQoL = health-related quality of life, iFE = infrequent exacerbations, IRR = incident rate ratio, OR = odds ratio, QoL = quality of life, RR = relative risk, SD = standard deviation, SGRQ = St. George's respiratory questionnaire, VAS = visual analogue scale.

**Data file 1: Mixed Methods Appraisal Tool Quality Assessment**

## Supplementary references

[1] A. Agarwal, S. Batra, R. Prasad, A. Verma, A.Q. Jilani, S. Kant, A study on the prevalence of depression and the severity of depression in patients of chronic obstructive pulmonary disease in a semi-urban Indian population, Monaldi Arch Chest Dis 88(1) (2018) 902. <https://doi.org/10.4081/monaldi.2018.902>.

[2] S.P. Bhatt, J.M. Wells, G.L. Kinney, G.R. Washko, Jr., M. Budoff, Y.I. Kim, W.C. Bailey, H. Nath, J.E. Hokanson, E.K. Silverman, J. Crapo, M.T. Dransfield, COPDGene Investigators, β-Blockers are associated with a reduction in COPD exacerbations, Thorax 71(1) (2016) 8–14. <https://doi.org/10.1136/thoraxjnl-2015-207251>.

[3] A. Bikov, A. Horváth, G. Tomisa, L. Bártfai, Z. Bártfai, Changes in the burden of comorbidities in patients with COPD and asthma-COPD overlap according to the GOLD 2017 recommendations, Lung 196(5) (2018) 591–599. <https://doi.org/10.1007/s00408-018-0141-7>.

[4] K. Brat, M. Plutinsky, K. Hejduk, M. Svoboda, P. Popelkova, J. Zatloukal, E. Volakova, M. Fecaninova, L. Heribanova, V. Koblizek, Respiratory parameters predict poor outcome in COPD patients, category GOLD 2017 B, Int J Chron Obstruct Pulmon Dis 13 (2018) 1037–1052. <https://doi.org/10.2147/copd.S147262>.

[5] G. Brusselle, D. Price, K. Gruffydd-Jones, M. Miravitlles, D.L. Keininger, R. Stewart, M. Baldwin, R.C. Jones, The inevitable drift to triple therapy in COPD: an analysis of prescribing pathways in the UK, Int J Chron Obstruct Pulmon Dis 10 (2015) 2207–2217. <https://doi.org/10.2147/copd.S91694>.

[6] I. Candemir, P. Ergun, D. Kaymaz, F. Tasdemir, N. Egesel, The comparison of clinical variables in two classifications: GOLD 2017 combined assessment and spirometric stage of chronic obstructive pulmonary disease, Tuberc Respir Dis (Seoul) 81(4) (2018) 281–288. <https://doi.org/10.4046/trd.2017.0114>.

[7] C. Casanova, J.M. Marin, C. Martinez-Gonzalez, P. de Lucas-Ramos, I. Mir-Viladrich, B. Cosio, G. Peces-Barba, M. Calle-Rubio, I. Solanes-García, R. Agüero, A. de Diego-Damia, N. Feu-Collado, I. Alfageme, R. Irigaray, E. Balcells, A. Llunell, J.B. Galdiz, M. Marín, J.J. Soler-Cataluña, J.L. Lopez-Campos, J.B. Soriano, J.P. de-Torres, New GOLD classification: longitudinal data on group assignment, Respir Res 15(1) (2014) 3. <https://doi.org/10.1186/1465-9921-15-3>.

[8] C.S. Chai, C.K. Liam, Y.K. Pang, D.L. Ng, S.B. Tan, T.S. Wong, J.E. Sia, Clinical phenotypes of COPD and health-related quality of life: a cross-sectional study, Int J Chron Obstruct Pulmon Dis 14 (2019) 565–573. <https://doi.org/10.2147/copd.S196109>.

[9] C.S. Chai, S.B. Mos, D.L. Ng, G.M. Goh, A.T. Su, M.A.B. Ibrahim, A.N.B. Musa, S.B. Tan, Y.K. Pang, C.K. Liam, Clinical phenotypes and heath-related quality of life of COPD patients in a rural setting in Malaysia - a cross-sectional study, BMC Pulm Med 20(1) (2020) 254. <https://doi.org/10.1186/s12890-020-01295-4>.

[10] J.D. Chalmers, C. Poole, S. Webster, A. Tebboth, S. Dickinson, A. Gayle, Assessing the healthcare resource use associated with inappropriate prescribing of inhaled corticosteroids for people with chronic obstructive pulmonary disease (COPD) in GOLD groups A or B: an observational study using the Clinical Practice Research Datalink (CPRD), Respir Res 19(1) (2018) 63. <https://doi.org/10.1186/s12931-018-0767-2>.

[11] C.Z. Chen, C.Y. Ou, C.H. Yu, S.C. Yang, H.Y. Chang, T.R. Hsiue, Comparison of global initiative for chronic obstructive pulmonary disease 2013 classification and body mass index, airflow obstruction, dyspnea, and exacerbations index in predicting mortality and exacerbations in elderly adults with chronic obstructive pulmonary disease, J Am Geriatr Soc 63(2) (2015) 244–250. <https://doi.org/10.1111/jgs.13258>.

[12] Y. Cheng, X. Tu, L. Pan, S. Lu, M. Xing, L. Li, X. Chen, Clinical characteristics of chronic bronchitic, emphysematous and ACOS phenotypes in COPD patients with frequent exacerbations, Int J Chron Obstruct Pulmon Dis 12 (2017) 2069–2074. <https://doi.org/10.2147/copd.S140231>.

[13] J. Cho, C.H. Lee, Y.I. Hwang, J.H. Lee, T.H. Kim, J.H. Lee, Y.M. Oh, K.H. Yoo, K.S. Jung, S.D. Lee, on behalf of the KOLD and KOCOSS Investigators, Outcome of regular inhaled treatment in GOLD A chronic obstructive pulmonary disease patients, Respiration 98(4) (2019) 312–320. <https://doi.org/10.1159/000495756>.

[14] H.S. Choi, J.O. Na, J.D. Lee, K.C. Shin, C.K. Rhee, Y.I. Hwang, S.Y. Lim, K.H. Yoo, K.S. Jung, Y.B. Park, Which GOLD B patients progress to GOLD D with the new classification?, Int J Chron Obstruct Pulmon Dis 13 (2018) 3233–3241. <https://doi.org/10.2147/copd.S177944>.

[15] R.N. Criner, W.W. Labaki, E.A. Regan, J.M. Bon, X. Soler, S.P. Bhatt, S. Murray, J.E. Hokanson, E.K. Silverman, J.D. Crapo, J.L. Curtis, F.J. Martinez, B.J. Make, M.K. Han, C.H. Martinez, COPDGene® Investigators, Mortality and exacerbations by Global Initiative for Chronic Obstructive Lung Disease Groups ABCD: 2011 versus 2017 in the COPDGene® cohort, Chronic Obstr Pulm Dis 6(1) (2019) 64–73. <https://doi.org/10.15326/jcopdf.6.1.2018.0130>.

[16] E. Crisafulli, R. Pisi, M. Aiello, M. Vigna, P. Tzani, A. Torres, G. Bertorelli, A. Chetta, Prevalence of small-airway dysfunction among COPD patients with different GOLD stages and its role in the impact of disease, Respiration 93(1) (2017) 32–41. <https://doi.org/10.1159/000452479>.

[17] B. Ding, M. Small, U. Holmgren, A cross-sectional survey of current treatment and symptom burden of patients with COPD consulting for routine care according to GOLD 2014 classifications, Int J Chron Obstruct Pulmon Dis 12 (2017) 1527–1537. <https://doi.org/10.2147/copd.S133793>.

[18] B. Ding, D. Judge, M. Small, N. Bent-Ennakhil, S. Siddiqui, Functional performance in patients with COPD: association with treatment regimen, GOLD group, lung function, and symptom burden in a cross-sectional study, Int J Chron Obstruct Pulmon Dis 13 (2018) 2785–2796. <https://doi.org/10.2147/copd.S170391>.

[19] G.C. Donaldson, H. Müllerova, N. Locantore, J.R. Hurst, P.M. Calverley, J. Vestbo, A. Anzueto, J.A. Wedzicha, Factors associated with change in exacerbation frequency in COPD, Respir Res 14(1) (2013) 79. <https://doi.org/10.1186/1465-9921-14-79>.

[20] R. Dua, Combined assessment based on symptom score and hospitilisation alone in stable patients of chronic obstructive pulmonary disease: An exploratory study, Lung India 36 (2019) Suppl. 3 S92-S182. <https://doi.org/10.4103/lungindia.lungindia_163_18>.

[21] A. Duarte-de-Araújo, P. Teixeira, V. Hespanhol, J. Correia-de-Sousa, Characterisation of morbidity in a COPD hospital cohort, Pulmonology 25(4) (2019) 200–207. <https://doi.org/10.1016/j.pulmoe.2019.02.010>.

[22] A.L. Echazarreta, S.J. Arias, R. Del Olmo, E.R. Giugno, F.D. Colodenco, S.C. Arce, J.C. Bossio, G. Armando, J.B. Soriano, Grupo de estudio EPOC.AR, Prevalence of COPD in 6 urban clusters in Argentina: the EPOC.AR study, Arch Bronconeumol (Engl Ed) 54(5) (2018) 260–269. <https://doi.org/10.1016/j.arbres.2017.09.018>.

[23] R. Faner, G. Noell, J.R. Badia, A. López-Giraldo, P. Bakke, E.K. Silverman, R. Tal-Singer, A. Agustí, Distribution, temporal stability and association with all-cause mortality of the 2017 GOLD groups in the ECLIPSE cohort, Respir Med 141 (2018) 14–19. <https://doi.org/10.1016/j.rmed.2018.06.015>.

[24] E. García Castillo, T. Alonso Pérez, J. Ancochea, M.T. Pastor Sanz, P. Almagro, P. Martínez-Camblor, M. Miravitlles, M. Rodríguez-Carballeira, A. Navarro, B. Lamprecht, A.S. Ramírez-García Luna, B. Kaiser, I. Alfageme, C. Casanova, C. Esteban, J.J. Soler-Cataluña, J.P. de-Torres, B.R. Celli, J.M. Marín, G. Ter Riet, P. Sobradillo, P. Lange, J. Garcia-Aymerich, J.M. Anto, A.M. Turner, M.K. Han, A. Langhammer, S.A.A. Vikjord, A. Sternberg, L. Leivseth, P. Bakke, A. Johannessen, T. Oga, B.G. Cosío, A. Echazarreta, N. Roche, P.R. Burgel, D.D. Sin, M.A. Puhan, J.L. López-Campos, L. Carrasco, J.B. Soriano, Mortality prediction in chronic obstructive pulmonary disease comparing the GOLD 2015 and GOLD 2019 staging: a pooled analysis of individual patient data, ERJ Open Res 6(4) (2020) 00253-02020. <https://doi.org/10.1183/23120541.00253-2020>.

[25] A. Gayle, S. Dickinson, K. Morris, C. Poole, A.G. Mathioudakis, J. Vestbo, What is the impact of GOLD 2017 recommendations in primary care? - a descriptive study of patient classifications, treatment burden and costs, Int J Chron Obstruct Pulmon Dis 13 (2018) 3485–3492. <https://doi.org/10.2147/copd.S173664>.

[26] A. Gedebjerg, S.K. Szépligeti, L.H. Wackerhausen, E. Horváth-Puhó, R. Dahl, J.G. Hansen, H.T. Sørensen, M. Nørgaard, P. Lange, R.W. Thomsen, Prediction of mortality in patients with chronic obstructive pulmonary disease with the new Global Initiative for Chronic Obstructive Lung Disease 2017 classification: a cohort study, Lancet Respir Med 6(3) (2018) 204–212. <https://doi.org/10.1016/s2213-2600(18)30002-x>.

[27] R. Golpe, N. Mengual-Macenlle, P. Sanjuán-López, E. Cano-Jiménez, O. Castro-Añón, L.A. Pérez-de-Llano, Prognostic indices and mortality prediction in COPD caused by biomass smoke exposure, Lung 193(4) (2015) 497–503. <https://doi.org/10.1007/s00408-015-9731-9>.

[28] J. Graf, R.A. Jörres, T. Lucke, D. Nowak, C.F. Vogelmeier, J.H. Ficker, Medical treatment of COPD, Dtsch Arztebl Int 155(37) (2018) 599–605. <https://doi.org/10.3238/arztebl.2018.0599>.

[29] F.A. Grewe, N.A. Sievi, M. Bradicich, M. Roeder, T. Brack, M.H. Brutsche, M. Frey, S. Irani, J.D. Leuppi, R. Thurnheer, C.F. Clarenbach, M. Kohler, Compliance of pharmacotherapy with GOLD guidelines: a longitudinal study in patients with COPD, Int J Chron Obstruct Pulmon Dis 15 (2020) 627–635. <https://doi.org/10.2147/copd.S240444>.

[30] H. Gunen, M. Yilmaz, O. Aktas, P. Ergun, M.G. Ortakoylu, A. Demir, P. Cetinkaya, A. Gurgun, M. Otlu, A. Cilli, U. Yilmaz, N. Kokturk, I. Candemir, H.I. Yakar, I. Ar, A. Konya, Categorization of COPD patients in Turkey via GOLD 2013 strategy document: ALPHABET study, Int J Chron Obstruct Pulmon Dis 10 (2015) 2485–2494. <https://doi.org/10.2147/copd.S87464>.

[31] K.K. Gupta, B. Roy, S.C. Chaudhary, A. Mishra, M.L. Patel, J. Singh, V. Kumar, Prevalence of pulmonary artery hypertension in patients of chronic obstructive pulmonary disease and its correlation with stages of chronic obstructive pulmonary disease, exercising capacity, and quality of life, J Family Med Prim Care 7(1) (2018) 53–57. <https://doi.org/10.4103/jfmpc.jfmpc_18_17>.

[32] D.M.G. Halpin, H.J.I. de Jong, V. Carter, D. Skinner, D. Price, Distribution, temporal stability and appropriateness of therapy of patients with COPD in the UK in relation to GOLD 2019, EClinicalMedicine 14 (2019) 32–41. <https://doi.org/10.1016/j.eclinm.2019.07.003>.

[33] M.Z. Han, T.R. Hsiue, S.H. Tsai, T.H. Huang, X.M. Liao, C.Z. Chen, Validation of the GOLD 2017 and new 16 subgroups (1A-4D) classifications in predicting exacerbation and mortality in COPD patients, Int J Chron Obstruct Pulmon Dis 13 (2018) 3425–3433. <https://doi.org/10.2147/copd.S179048>.

[34] M. Högman, J. Sulku, B. Ställberg, C. Janson, K. Bröms, H. Hedenström, K. Lisspers, A. Malinovschi, 2017 Global Initiative for Chronic Obstructive Lung Disease reclassifies half of COPD subjects to lower risk group, Int J Chron Obstruct Pulmon Dis 13 (2018) 165–173. <https://doi.org/10.2147/copd.S151016>.

[35] A. Horner, O.C. Burghuber, S. Hartl, M. Studnicka, M. Merkle, H. Olschewski, B. Kaiser, E.M. Wallner, B. Lamprecht, Quality of life and limitations in daily life of stable COPD outpatients in a real-world setting in Austria - results from the CLARA project, Int J Chron Obstruct Pulmon Dis 15 (2020) 1655–1663. <https://doi.org/10.2147/copd.S252033>.

[36] M.J. Hsieh, S.Y. Huang, T.M. Yang, C.W. Tao, S.L. Cheng, C.H. Lee, P.H. Kuo, Y.K. Wu, N.H. Chen, W.H. Hsu, J.Y. Hsu, M.S. Lin, C.C. Wang, Y.F. Wei, Y.H. Tsai, The impact of 2011 and 2017 Global Initiative for Chronic Obstructive Pulmonary Disease (GOLD) guidelines on allocation and pharmacological management of patients with COPD in Taiwan: Taiwan Obstructive Lung Disease (TOLD) study, Int J Chron Obstruct Pulmon Dis 13 (2018) 2949–2959. <https://doi.org/10.2147/copd.S176065>.

[37] A. Hussey, K. Wing, M. Ferrone, C. Licskai, COPD integrated disease management, from controlled trial to real-world primary care; a cohort study, Eur Respir J 56(suppl 64) (2020) 3256. <https://doi.org/10.1183/13993003.congress-2020.3256>.

[38] D. Ierodiakonou, D. Sifaki-Pistolla, M. Kampouraki, I. Poulorinakis, P. Papadokostakis, I. Gialamas, P. Athanasiou, V. Bempi, I. Lampraki, I. Tsiligianni, Adherence to inhalers and comorbidities in COPD patients. A cross-sectional primary care study from Greece, BMC Pulm Med 20(1) (2020) 253. <https://doi.org/10.1186/s12890-020-01296-3>.

[39] Y. Ivanov, I. Nikolaev, I. Nemeth, Real-life evaluation of COPD treatment in a Bulgarian population: a 1-year prospective, observational, noninterventional study, Int J Chron Obstruct Pulmon Dis 13 (2018) 653–663. <https://doi.org/10.2147/copd.S153969>.

[40] P.W. Jones, G. Nadeau, M. Small, L. Adamek, Characteristics of a COPD population categorised using the GOLD framework by health status and exacerbations, Respir Med 108(1) (2014) 129–135. <https://doi.org/10.1016/j.rmed.2013.08.015>.

[41] Y.H. Jung, D.Y. Lee, D.W. Kim, S.S. Park, E.Y. Heo, H.S. Chung, D.K. Kim, Clinical significance of laryngopharyngeal reflux in patients with chronic obstructive pulmonary disease, Int J Chron Obstruct Pulmon Dis 10 (2015) 1343–1351. <https://doi.org/10.2147/copd.S84337>.

[42] K. Kahnert, P. Alter, D. Young, T. Lucke, J. Heinrich, R.M. Huber, J. Behr, M. Wacker, F. Biertz, H. Watz, R. Bals, T. Welte, H. Wirtz, F. Herth, J. Vestbo, E.F. Wouters, C.F. Vogelmeier, R.A. Jörres, The revised GOLD 2017 COPD categorization in relation to comorbidities, Respir Med 134 (2018) 79–85. <https://doi.org/10.1016/j.rmed.2017.12.003>.

[43] M. Kamusheva, M. Dimitrova, J.F. van Boven, M.J. Postma, T. van der Molen, J.W. Kocks, K. Mitov, M. Doneva, D. Petrova, O. Georgiev, V. Petkova, G. Petrova, Clinical characteristics, treatment patterns, and socio-economic burden of COPD in Bulgaria, J Med Econ 20(5) (2017) 503–509. <https://doi.org/10.1080/13696998.2017.1279620>.

[44] J. Kim, H.I. Yoon, Y.M. Oh, S.Y. Lim, J.H. Lee, T.H. Kim, S.Y. Lee, J.H. Lee, S.D. Lee, C.H. Lee, Lung function decline rates according to GOLD group in patients with chronic obstructive pulmonary disease, Int J Chron Obstruct Pulmon Dis 10 (2015) 1819–1827. <https://doi.org/10.2147/copd.S87766>.

[45] S. Kobayashi, M. Hanagama, M. Ishida, H. Sato, M. Ono, S. Yamanda, M. Yamada, H. Aizawa, M. Yanai, Clinical characteristics and outcomes in Japanese patients with COPD according to the 2017 GOLD classification: the Ishinomaki COPD Network Registry, Int J Chron Obstruct Pulmon Dis 13 (2018) 3947–3955. <https://doi.org/10.2147/copd.S182905>.

[46] I. Kupryś-Lipińska, P. Kuna, Impact of chronic obstructive pulmonary disease (COPD) on patient's life and his family, Pneumonol Alergol Pol 82(2) (2014) 82–95. <https://doi.org/10.5603/PiAP.2014.0014>.

[47] P.J. Lawrence, U. Kolsum, V. Gupta, G. Donaldson, R. Singh, B. Barker, L. George, A. Webb, A.J. Brookes, C. Brightling, J. Wedzicha, D. Singh, Characteristics and longitudinal progression of chronic obstructive pulmonary disease in GOLD B patients, BMC Pulm Med 17(1) (2017) 42. <https://doi.org/10.1186/s12890-017-0384-8>.

[48] L.A.K. Le, A. Johannessen, J.A. Hardie, O.E. Johansen, A. Gulsvik, B.E. Vikse, P. Bakke, Prevalence and prognostic ability of the GOLD 2017 classification compared to the GOLD 2011 classification in a Norwegian COPD cohort, Int J Chron Obstruct Pulmon Dis 14 (2019) 1639–1655. <https://doi.org/10.2147/copd.S194019>.

[49] S.J. Lee, S.S. Yun, S. Ju, J.W. You, Y.J. Cho, Y.Y. Jeong, J.Y. Kim, H.C. Kim, J.D. Lee, Validity of the GOLD 2017 classification in the prediction of mortality and respiratory hospitalization in patients with chronic obstructive pulmonary disease, Int J Chron Obstruct Pulmon Dis 14 (2019) 911–919. <https://doi.org/10.2147/copd.S191362>.

[50] L. Leivseth, B.M. Brumpton, T.I. Nilsen, X.M. Mai, R. Johnsen, A. Langhammer, GOLD classifications and mortality in chronic obstructive pulmonary disease: the HUNT Study, Norway, Thorax 68(10) (2013) 914–921. <https://doi.org/10.1136/thoraxjnl-2013-203270>.

[51] Y. Li, J. Lim, S. Stemkowski, S. Kaila, A. Renda, A. Shaikh, Initiation of triple therapy maintenance treatment among patients with COPD, Am J Manag Care 26(4) (2020) e106–e112. <https://doi.org/10.37765/ajmc.2020.42837>.

[52] A. Løkke, P. Lange, J. Lykkegaard, R. Ibsen, M. Andersson, S. de Fine Licht, O. Hilberg, Economic burden of COPD by disease severity - A nationwide cohort study in Denmark, Value in Health 23 (2020) Suppl. 2 S720. <https://doi.org/10.1016/j.jval.2020.08.1903>.

[53] L.C. Loh, C.K. Ong, H.J. Koo, S.M. Lee, J.S. Lee, Y.M. Oh, J.B. Seo, S.D. Lee, A novel CT-emphysema index/FEV(1) approach of phenotyping COPD to predict mortality, Int J Chron Obstruct Pulmon Dis 13 (2018) 2543–2550. <https://doi.org/10.2147/copd.S165898>.

[54] C. Cabrera López, C. Casanova Macario, J.M. Marín Trigo, J.P. de-Torres, R. Sicilia Torres, J.M. González, F. Polverino, M. Divo, V. Pinto Plata, J.J. Zulueta, B. Celli, Comparison of the 2017 and 2015 Global Initiative for Chronic Obstructive Lung Disease reports. Impact on grouping and outcomes, Am J Respir Crit Care Med 197(4) (2018) 463–469. <https://doi.org/10.1164/rccm.201707-1363OC>.

[55] R. Marçôa, D.M. Rodrigues, M. Dias, I. Ladeira, A.P. Vaz, R. Lima, M. Guimarães, Classification of Chronic Obstructive Pulmonary Disease (COPD) according to the new Global Initiative for Chronic Obstructive Lung Disease (GOLD) 2017: comparison with GOLD 2011, COPD 15(1) (2018) 21–26. <https://doi.org/10.1080/15412555.2017.1394285>.

[56] J.R. Mehta, I.J. Ratnani, J.D. Dave, B.N. Panchal, A.K. Patel, A.U. Vala, Association of psychiatric co-morbidities and quality of life with severity of chronic obstructive pulmonary disease, East Asian Arch Psychiatry 24(4) (2014) 148–155. <https://doi.org/>.

[57] A.M. Menezes, F.C. Wehrmeister, R. Perez-Padilla, K.P. Viana, C. Soares, H. Müllerova, G. Valdivia, J.R. Jardim, M. Montes de Oca, The PLATINO study: description of the distribution, stability, and mortality according to the Global Initiative for Chronic Obstructive Lung Disease classification from 2007 to 2017, Int J Chron Obstruct Pulmon Dis 12 (2017) 1491–1501. <https://doi.org/10.2147/copd.S136023>.

[58] E. Merinopoulou, M. Raluy-Callado, S. Ramagopalan, S. MacLachlan, J.M. Khalid, COPD exacerbations by disease severity in England, Int J Chron Obstruct Pulmon Dis 11 (2016) 697–709. <https://doi.org/10.2147/copd.S100250>.

[59] M. Miravitlles, M. Barrecheguren, M. Román-Rodríguez, Frequency and characteristics of different clinical phenotypes of chronic obstructive pulmonary disease, Int J Tuberc Lung Dis 19(8) (2015) 992–998. <https://doi.org/10.5588/ijtld.15.0021>.

[60] V. Moya-Álvarez, J.L. Quevedo-Marín, Z. Ji, C. Navarro-Jiménez, R. Jiménez-García, A. López-de-Andrés, A. Pérez-Trullén, J. de Miguel-Díez, Variation in assignment of the COPD patients into a GOLD group according to symptoms severity, Int J Chron Obstruct Pulmon Dis 15 (2020) 1987–1995. <https://doi.org/10.2147/copd.S253445>.

[61] C.Q. Ngo, T. Thi Bui, G.V. Vu, H.T. Chu, P.T. Phan, H. Ngoc Pham, G.T. Vu, L.H. Nguyen, G.H. Ha, B.X. Tran, C.A. Latkin, C.S.H. Ho, R.C.M. Ho, Direct hospitalization cost of patients with acute exacerbation of chronic obstructive pulmonary disease in Vietnam, Int J Environ Res Public Health 16(1) (2018) 88. <https://doi.org/10.3390/ijerph16010088>.

[62] D. Nurwidhiyasari, S.F. Rachmi, A. Indracahyani, T. Nuraini, Relationship between severity and quality of life in chronic obstructive pulmonary disease patients at hospitals' outpatient units in Jakarta, Enfermería Clínica 29(Suppl 2) (2019) 159–165. <https://doi.org/10.1016/j.enfcli.2019.04.024>.

[63] S. Ocheltree, E. Male, H. Zhao, C. Martinez, C. Cooper, E. Bleecker, R. Boucher, J. Curtis, N. Hansel, I. Barjaktarevic, R. Barr, R. Kanner, R. Wise, M. Kesimer, R. Paine 3rd, N. Putcha, S. Rennard, D. Tashkin, P. Woodruff, M. Han, F. Martinez, G. Criner, V. Kim, Differences in GOLD 2017 treatment group assignments between the COPD Assessment Test and Modified Medical Research Council Dyspnea Scale and their association with exacerbations: an analysis of the SPIROMICS cohort, Am J Respir Crit Care Med 199 (2019) A1113. <https://doi.org/10.1164/ajrccm-conference.2019.199.1_MeetingAbstracts.A1113>.

[64] K. Oishi, T. Hirano, K. Hamada, S. Uehara, R. Suetake, Y. Yamaji, K. Ito, M. Asami-Noyama, N. Edakuni, K. Matsunaga, Characteristics of 2017 GOLD COPD group A: a multicenter cross-sectional CAP study in Japan, Int J Chron Obstruct Pulmon Dis 13 (2018) 3901–3907. <https://doi.org/10.2147/copd.S181938>.

[65] G.A. Palmiotti, D. Lacedonia, V. Liotino, P. Schino, F. Satriano, P.L. Di Napoli, E. Sabato, V. Mastrosimone, A. Scoditti, M. Carone, E. Costantino, E. Resta, E. Attolini, M.P. Foschino Barbaro, Adherence to GOLD guidelines in real-life COPD management in the Puglia region of Italy, Int J Chron Obstruct Pulmon Dis 13 (2018) 2455–2462. <https://doi.org/10.2147/copd.S157779>.

[66] M. Plutinsky, K. Brat, M. Svoboda, J. Zatloukal, P. Popelkova, V. Koblizek, Prognostic accuracy of three COPD classification systems in relation to long-term mortality of COPD patients: a prospective multicenter study, Lung 197(2) (2019) 173–179. <https://doi.org/10.1007/s00408-019-00196-6>.

[67] D. Price, D. West, G. Brusselle, K. Gruffydd-Jones, R. Jones, M. Miravitlles, A. Rossi, C. Hutton, V.L. Ashton, R. Stewart, K. Bichel, Management of COPD in the UK primary-care setting: an analysis of real-life prescribing patterns, Int J Chron Obstruct Pulmon Dis 9 (2014) 889–904. <https://doi.org/10.2147/copd.S62750>.

[68] D. Price, M. Miravitlles, I. Pavord, M. Thomas, J. Wedzicha, J. Haughney, K. Bichel, D. West, First maintenance therapy for COPD in the UK between 2009 and 2012: a retrospective database analysis, NPJ Prim Care Respir Med 26 (2016) 16061. <https://doi.org/10.1038/npjpcrm.2016.61>.

[69] D. Radovanovic, M. Contoli, F.D. Marco, G. Sotgiu, G. Pelaia, F. Braido, A.G. Corsico, C. Micheletto, P. Rogliani, N. Scichilone, L. Saderi, P. Santus, P. Solidoro, Clinical and functional characteristics of COPD patients across GOLD classifications: results of a multicenter observational study, COPD 16(3-4) (2019) 215–226. <https://doi.org/10.1080/15412555.2019.1659760>.

[70] R.M. Rajnoveanu, A.G. Rajnoveanu, A.B. Ardelean, D.A. Todea, C.M. Pop, S.A. Antoniu, N.S. Motoc, A.F. Chis, A.P. Fildan, M.A. Man, Pulmonologists adherence to the chronic obstructive pulmonary disease GOLD guidelines: a goal to improve, Medicina (Kaunas) 56(9) (2020) 422. <https://doi.org/10.3390/medicina56090422>.

[71] M. Raluy-Callado, D. Lambrelli, S. MacLachlan, J.M. Khalid, Epidemiology, severity, and treatment of chronic obstructive pulmonary disease in the United Kingdom by GOLD 2013, Int J Chron Obstruct Pulmon Dis 10 (2015) 925–937. <https://doi.org/10.2147/copd.S82064>.

[72] J.H. Song, C.H. Lee, S.J. Um, Y.B. Park, K.H. Yoo, K.S. Jung, S.D. Lee, Y.M. Oh, J.H. Lee, E.K. Kim, D.K. Kim, KOLD KOCOSS and SNU airway registry investigators, Clinical impacts of the classification by 2017 GOLD guideline comparing previous ones on outcomes of COPD in real-world cohorts, Int J Chron Obstruct Pulmon Dis 13 (2018) 3473–3484. <https://doi.org/10.2147/copd.S177238>.

[73] E. Stafyla, M. Geitona, T. Kerenidi, A. Economou, Z. Daniil, K.I. Gourgoulianis, The annual direct costs of stable COPD in Greece, Int J Chron Obstruct Pulmon Dis 13 (2018) 309–315. <https://doi.org/10.2147/copd.S148051>.

[74] L. Sun, Y. Chen, R. Wu, M. Lu, W. Yao, Changes in definition lead to changes in the clinical characteristics across COPD categories according to GOLD 2017: a national cross-sectional survey in China, Int J Chron Obstruct Pulmon Dis 12 (2017) 3095–3102. <https://doi.org/10.2147/copd.S142801>.

[75] J. Sundh, J. Åberg, M. Hasselgren, S. Montgomery, B. Ställberg, K. Lisspers, C. Janson, Factors influencing pharmacological treatment in COPD: a comparison of 2005 and 2014, Eur Clin Respir J 4(1) (2017) 1409060. <https://doi.org/10.1080/20018525.2017.1409060>.

[76] H. Tashiro, Y. Kurihara, K. Takahashi, H. Sadamatsu, T. Haraguchi, R. Tajiri, A. Takamori, S. Kimura, N. Sueoka-Aragane, Clinical features of Japanese patients with exacerbations of chronic obstructive pulmonary disease, BMC Pulm Med 20(1) (2020) 318. <https://doi.org/10.1186/s12890-020-01362-w>.

[77] M. Thomsen, T.S. Ingebrigtsen, J.L. Marott, M. Dahl, P. Lange, J. Vestbo, B.G. Nordestgaard, Inflammatory biomarkers and exacerbations in chronic obstructive pulmonary disease, JAMA 309(22) (2013) 2353–2361. <https://doi.org/10.1001/jama.2013.5732>.

[78] J. Vestbo, C.F. Vogelmeier, M. Small, J. Siddall, R. Fogel, K. Kostikas, Inhaled corticosteroid use by exacerbations and eosinophils: a real-world COPD population, Int J Chron Obstruct Pulmon Dis 14 (2019) 853–861. <https://doi.org/10.2147/copd.S189585>.

[79] S.M. von Siemens, R.A. Jörres, J. Behr, P. Alter, J. Lutter, T. Lucke, S. Söhler, T. Welte, H. Watz, C.F. Vogelmeier, F. Trudzinski, W. Rief, B. Herbig, K. Kahnert, COSYCONET study group, Effect of COPD severity and comorbidities on the result of the PHQ-9 tool for the diagnosis of depression: results from the COSYCONET cohort study, Respir Res 20(1) (2019) 30. <https://doi.org/10.1186/s12931-019-0997-y>.

[80] E.E. Yazar, B. Yiğitbaş, E.Y. Niksarlıoğlu, M. Bayraktaroğlu, S. Kul, Is group C really needed as a separate group from D in COPD? A single-center cross-sectional study, Pulmonology (2020) Online ahead of print. <https://doi.org/10.1016/j.pulmoe.2020.06.012>.

[81] S. Yeung, P. Chan, L. Lai, K. Chow, M. Luk, D. Chao, Prevalence of different severities of chronic obstructive pulmonary disease in an out-patient clinic in Hong Kong, HK Pract 38 (2016) 3–12. <https://doi.org/>.

[82] Y. Zeng, S. Cai, Y. Chen, J. Duan, Y. Zhao, X. Li, L. Ma, Q. Liu, Y. Zhu, M. Chen, M. Zhou, P. Chen, Current status of the treatment of COPD in China: a multicenter prospective observational study, Int J Chron Obstruct Pulmon Dis 15 (2020) 3227–3237. <https://doi.org/10.2147/copd.S274024>.

[83] Z. Zhou, A. Zhou, Y. Peng, J. Duan, Y. Zeng, Y. Zhao, W. Cheng, P. Chen, Determinants of clinical COPD questionnaire in patients with COPD: a cross-sectional observational study, Respiration 99(7) (2020) 606–616. <https://doi.org/10.1159/000507097>.
